# Supplementary material for: Yttrium complexes incorporating the chelating diamides {ArN(CH2)xNAr}2−(Ar = C6H3-2,6-iPr2, x = 2, 3) and their unusual reaction with phenylsilane
Source: Royal Society of Chemistry journal article supplement (doi:10.1039/b400149d), 2004-01-01
Supplement: b400149d.doc [file b400149d.doc]

# Yttrium Complexes Incorporating the Chelating Diamides {ArN(CH2)xNAr}2- (Ar = C6H3-2,6-iPr2, x = 2, 3) and their Unusual Reaction with Phenylsilane

Anthony G. Avent, F. Geoffrey N. Cloke,* Benjamin R. Elvidge and Peter B. Hitchcock

Department of Chemistry, School of Life Sciences, University Of Sussex, Falmer, Brighton, BN1 9QJ, UK. Fax: +44 1273 677196; Tel: +44 1273 678735

E-mail:f.g.cloke@sussex.ac.uk

# Electronic Supplementary Information

## Contents

Molecular structure of [Y{ArN(CH2)3NAr}(OC6H2-2,6-tBu-4-Me)(THF)]

2.0 – 0.6 ppm region of the variable temperature 1H NMR spectra of **6** in *d*8-toluene

Selected bond lengths (Å) and angles (°) in **7**, **8**, **9**

Selected bond lengths (Å) and angles (°) in **10**, **11**, **14**

Selected bond lengths (Å) and angles (°) in **15**, **16**

Table of crystallographic data for **7**, **8**, **9**

Table of crystallographic data for **10**, **11**, **14**

Table of crystallographic data for **15**, **16**

Synthesis of YI3, Potassium Menthoxide, K2{ArN(CH2)2NAr} **4**, [{Y{ArN(CH2)2NAr}I(THF)2}2] **10**, [Y{ArN(CH2)2NAr}{CH(SiMe3)2}(THF)] **11**, [Y{ArN(CH2)2NAr}(CH2C6H5)(THF)2] **12**, [Y{ArN(CH2)2NAr}{N(SiMe3)2}(THF)] **13**

Crystal Data and Structure Refinements


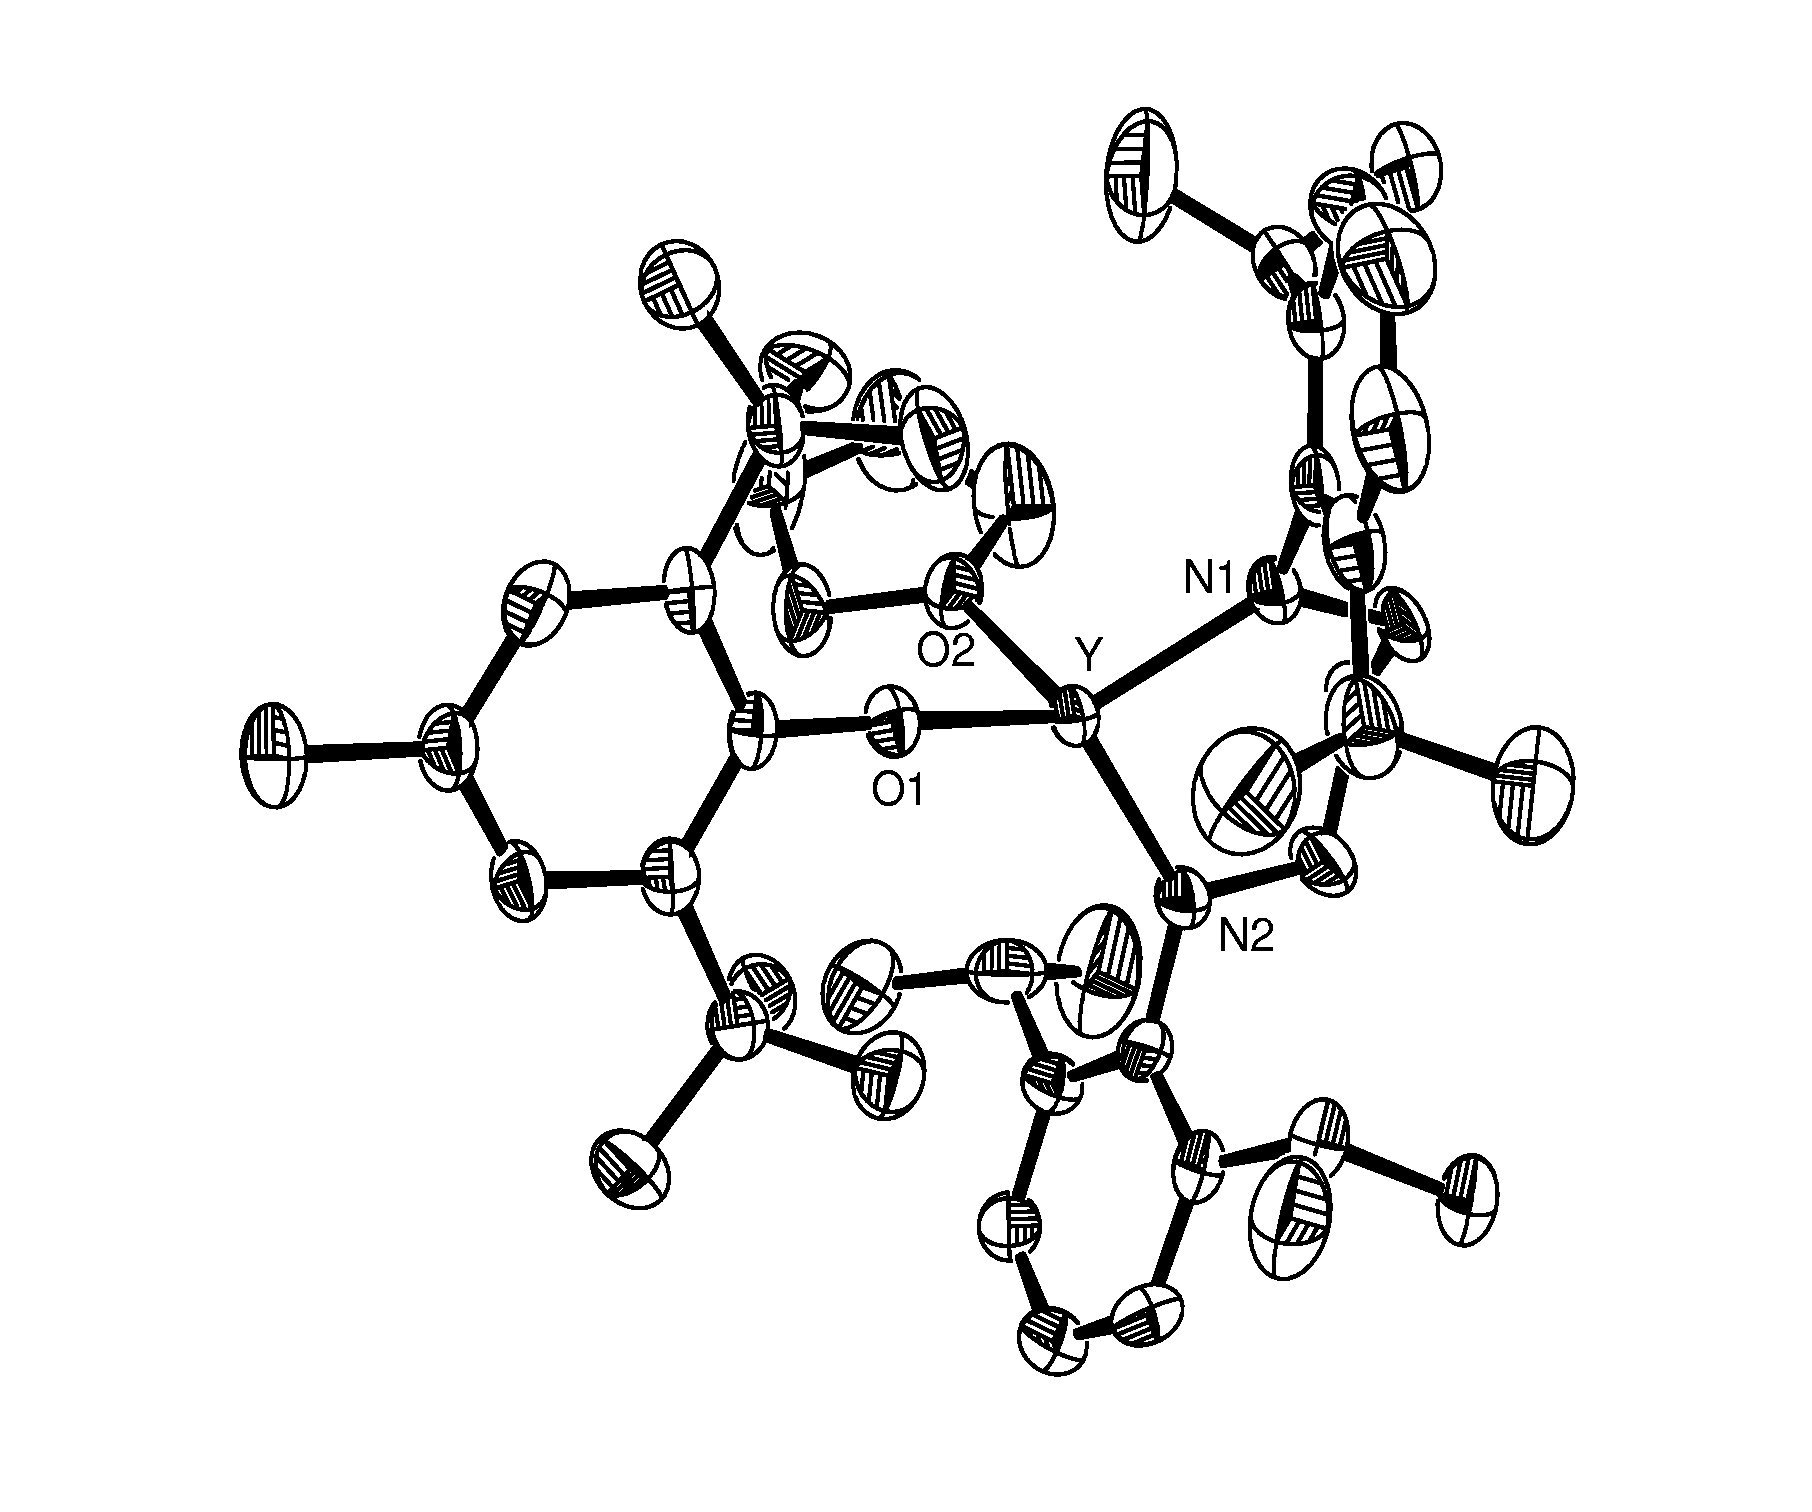


ORTEP representation of the molecular structure of [Y{ArN(CH2)3NAr}(OC6H2-2,6-tBu-4-Me)(THF)]. Thermal ellipsoids are drawn at the 50% probability level. Hydrogen atoms are omitted for clarity.

Selected bond lengths (Å) and angles (°) in

[Y{ArN(CH2)3NAr}(OC6H2-2,6-tBu-4-Me)(THF)]

| Y-O(1) | 2.092(3) | N(1)-Y-N(2) | 95.87(14) |
| --- | --- | --- | --- |
| Y-N(1) | 2.160(4) | O(1)-Y-N(1) | 120.08(14) |
| Y-N(2) | 2.186(4) | O(1)-Y-N(2) | 130.28(14) |
| Y-O(2) | 2.324(3) | N(1)-Y-O(2) | 109.42(13) |
|  |  | N(2)-Y-O(2) | 103.99(14) |

2.0 – 0.6 ppm region of the variable temperature 1H NMR spectra of **6** in *d*8-toluene, in five degree increments from 0 °C (top left) to –45 °C (bottom right)

Selected bond lengths (Å) and angles (°) in **7**

| Y-N(1) | 2.215(4) | N(2)-Y-N(1) | 92.92(14) |
| --- | --- | --- | --- |
| Y-N(2) | 2.191(3) | Y-C(28)-C(29) | 121.2(3) |
| Y-O(1) | 2.447(3) | N(1)-Y-O(1) | 157.50(14) |
| Y-O(2) | 2.396(3) | N(1)-Y-O(2) | 89.37(13) |
| Y-C(28) | 2.458(4) | N(2)-Y-O(1) | 91.53(12) |
|  |  | N(2)-Y-O(2) | 143.22(13) |
|  |  | O(1)-Y-O(2) | 74.12(12) |
|  |  | N(1)-Y-C(28) | 100.47(14) |
|  |  | N(2)-Y-C(28) | 109.90(16) |
|  |  | O(1)-Y-C(28) | 98.70(15) |
|  |  | O(2)-Y-C(28) | 105.72(16) |

Selected bond lengths (Å) and angles (°) in **8**

| Y-N(1) | 2.188(4) | N(1)-Y-N(2) | 95.43(14) |
| --- | --- | --- | --- |
| Y-N(2) | 2.194(3) | N(1)-Y-N(3) | 127.00(16) |
| Y-N(3) | 2.272(3) | N(2)-Y-N(3) | 126.24(13) |
| Y-O | 2.320(3) | N(1)-Y-O | 104.09(15) |
|  |  | N(2)-Y-O | 104.87(13) |
|  |  | N(3)-Y-O | 95.74(15) |

Selected bond lengths (Å) and angles (°) in **9**

| Y-N(1) | 2.213(4) | N(1)-Y-N(2) | 92.80(16) |
| --- | --- | --- | --- |
| Y-N(2) | 2.265(4) | N(1)-Y-N(3) | 117.20(16) |
| Y-N(3) | 2.246(4) | N(1)-Y-N(4) | 121.81(15) |
| Y-N(4) | 2.246(4) | N(2)-Y-N(3) | 113.77(15) |
| K-C(55) | 3.014(11) | N(2)-Y-N(4) | 117.06(17) |
| K-C(46) | 3.090(7) | N(3)-Y-N(4) | 95.80(16) |
| K-C(47) | 3.102(7) |  |  |
| K-C(17) | 3.163(6) |  |  |
| K-C(18) | 3.078(8) |  |  |
| K-C(19) | 3.150(8) |  |  |
| K-C(20) | 3.272(7) |  |  |

Selected bond lengths (Å) and angles (°) in **10**

| Y(1b)-N(1b) | 2.212(10) | N(1b)-Y(1b)-N(1b) | 78.7(4) |
| --- | --- | --- | --- |
| Y(1b)-N(2b) | 2.198(11) | I(1b)-Y(1b)-I(1b_2) | 76.67(4) |
| Y(1b)-O(1b) | 2.417(9) | Y(1b)-I(1b)-Y(1b_2) | 103.33(4) |
| Y(1b)-O(2b) | 2.394(8) | O(1b)-Y(1b)-N(2b) | 167.8(3) |
| Y(1b)-I(1b) | 3.122(2) | I(1b)-Y(1b)-O(2b) | 150.6(2) |
| Y(1b)-I(1b_2) | 3.232(2) | I(1b_2)-Y(1b)-N(2b) | 101.6(3) |
|  |  | O(1b)-Y(1b)-O(2b) | 78.3(3) |
|  |  | O(1b)-Y(1b)-N(1b) | 89.3(4) |
|  |  | O(1b)-Y(1b)-I(1b) | 86.4(2) |

Selected bond lengths (Å) and angles (°) in **11**

| Y-N(1) | 2.149(3) | N(1)-Y-N(2) | 80.32(12) |
| --- | --- | --- | --- |
| Y-N(2) | 2.180(3) | N(1)-Y-C(27) | 117.26(13) |
| Y-C(27) | 2.434(4) | N(2)-Y-C(27) | 127.08(13) |
| Y-O | 2.327(3) | N(1)-Y-O | 104.78(11) |
|  |  | N(2)-Y-O | 108.31(11) |
|  |  | O(1)-Y-C(27) | 113.29(12) |

Selected bond lengths (Å) and angles (°) in **14**

| Y(1)-N(1) | 2.184(7) | N(1)-Y(1)-N(2) | 81.4(2) |
| --- | --- | --- | --- |
| Y(1)-N(2) | 2.189(7) | N(1)-Y(1)-H(1x) | 109.2(15) |
| Y(2)-N(4) | 2.218(6) | N(2)-Y(1)-H(1x) | 116.1(15) |
| Y(2)---N(3) | 2.589(7) | N(1)-Y(1)-H(3x) | 116.0(17) |
| Y(3)-N(5) | 2.196(7) | N(2)-Y(1)-H(3x) | 104.4(18) |
| Y(3)---N(6) | 2.615(7) | H(1x)-Y(1)-H(3x) | 122(2) |
| Y(2)-O | 2.375(5) | N(1)-Y(1)-H(4x) | 116.2(18) |
| Y(1)-H(1x) | 2.18(6) | N(2)-Y(1)-H(4x) | 162.3(18) |
| Y(3)-H(1x) | 1.98(6) | H(1x)-Y(1)-H(4x) | 62(2) |
| Y(2)-H(2x) | 2.14(5) | H(4x)-Y(1)-H(4x) | 67(3) |
| Y(3)-H(2x) | 2.06(5) | N(1)-Y(1)-H(5x) | 164(3) |
| Y(1)-H(3x) | 2.15(7) | N(2)-Y(1)-H(5x) | 114(3) |
| Y(2)-H(3x) | 1.98(6) | H(1x)-Y(1)-H(5x) | 69(3) |
| Y(1)-H(4x) | 2.30(8) | H(3x)-Y(1)-H(5x) | 58(3) |
| Y(2)-H(4x) | 2.39(8) | H(4x)-Y(1)-H(5x) | 49(3) |
| Y(3)-H(4x) | 2.07(7) |  |  |
| Y(1)-H(5x) | 2.13(10) |  |  |
| Y(2)-H(5x) | 1.94(10) |  |  |
| Y(3)-H(5x) | 2.38(10) |  |  |

Selected bond lengths (Å) and angles (°) in **15**

| Y-N(1) | 2.173(4) | N(1)-Y-N(2) | 82.53(15) |
| --- | --- | --- | --- |
| Y-N(2) | 2.168(4) | N(1)-Y-O(1) | 126.86(16) |
| Y-O(1) | 2.066(4) | N(1)-Y-O(2) | 107.70(16) |
| Y-O(2) | 2.319(4) | N(2)-Y-O(1) | 128.75(14) |
|  |  | N(2)-Y-O(2) | 111.21(15) |
|  |  | O(1)-Y-O(2) | 98.99(15) |

Selected bond lengths (Å) and angles (°) in **16**

| Si-N(1) | 1.7098(13) | N(1)-Si-N(2) | 93.59(6) |
| --- | --- | --- | --- |
| Si-N(2) | 1.7196(13) | C(3)-N(1)-C(1) | 119.44(12) |
| Si-H(1) | 1.382(0.015) | C(1)-N(1)-Si | 112.56(10) |
| Si-C(27) | 1.8557(16) | Si-N(1)-C(3) | 127.22(10) |
|  |  | N(1)-Si-H(1) | 110.7( 0.6) |
|  |  | N(2)-Si-H(1) | 117.7( 0.6) |
|  |  | C(27)-Si-H(1) | 103.7( 0.6) |

**Table 4** Crystallographic data for **7**, **8**, **9**

|  | 7 | 8 | 9 |
| --- | --- | --- | --- |
| Formula | YC42H63N2O2 | YC37H66N3OSi2 | YC61H88N4K |
| M | 716.85 | 714.02 | 1005.36 |
| Crystal Size (mm) | 0.3 x 0.3 x 0.2 | 0.3 x 0.3 x 0.2 | 0.20 x 0.15 x 0.05 |
| Crystal System | Monoclinic | Monoclinic | Monoclinic |
| Space Group | P21 (No.4) | P21 (No.4) | P21/c (No.14) |
| *a* (Å) | 9.1530(2) | 11.0609(4) | 12.2379(2) |
| *b* (Å) | 19.1733(4) | 17.1207(6) | 13.0294(2) |
| *c* (Å) | 11.5265(3) | 11.3288(4) | 36.6872(6) |
| *α* (°) | 90 | 90 | 90 |
| *β* (°) | 99.595(1) | 106.524(2) | 98.851(1) |
| *γ* (°) | 90 | 90 | 90 |
| U (Å3) | 1994.52(8) | 2056.74(13) | 5780.2(2) |
| Z | 2 | 2 | 4 |
| *D*c (g cm-3) | 1.19 | 1.15 | 1.16 |
| *μ* (mm-1) | 1.5 | 1.51 | 1.12 |
| *F* (000) | 768 | 768 | 2160 |
| ** Range (°) | 3.74 to 25.02 | 3.75 to 23.52 | 3.72 to 22.61 |
| Data Collected (hkl) | -10 to 10, -22 to 22, -12 to 13 | -12 to 11, -19 to 19, -10 to 12 | -10 to 13, -14 to 13, -39 to 38 |
| Reflections Collected | 13142 | 10087 | 24408 |
| Independent Reflections | 6240 | 5629 | 7471 |
| Rint | 0.049 | 0.042 | 0.075 |
| Final R1, *w*R2 [I > 2σ(I)] | 0.042, 0.092 | 0.042, 0.096 | 0.068, 0.131 |
| R1, *w*R2 (all data) | 0.052, 0.097 | 0.050, 0.101 | 0.110, 0.148 |
| Goodness of fit on *F*2 | 1.041 | 1.03 | 1.062 |
| Δ*ρ*max,min (e Å -3) | 0.32, -0.27 | 0.31, -0.33 | 0.58, -0.44 |

Table of crystallographic data for **10**, **11**, **14**

|  | 10 | 11 | 14 |
| --- | --- | --- | --- |
| Formula | Y2C68H108I2N4O4.2.5(C7H8) | YC37H65N2OSi2.0.5(C5H12) | Y3C87H141N6O |
| M | 1707.54 | 735.07 | 1553.79 |
| Crystal Size (mm) | 0.20 x 0.15 x 0.05 | 0.10 x 0.10 x 0.05 | 0.10 x 0.10 x 0.05 |
| Crystal System | Triclinic | Monoclinic | Monoclinic |
| Space Group | P-1 (No.2) | P21/n (No.14) | P21/c (No.14) |
| *a* (Å) | 12.2250(4) | 12.5573(2) | 25.4497(7) |
| *b* (Å) | 14.2440(4) | 17.9434(3) | 14.2389(3) |
| *c* (Å) | 25.3516(9) | 19.4501(3) | 25.1449(5) |
| *α* (°) | 78.418(1) | 90 | 90 |
| *β* (°) | 80.205(1) | 99.444(1) | 105.140(1) |
| *γ* (°) | 85.201(2) | 90 | 90 |
| U (Å3) | 4256.0(2) | 4323.1(1) | 8795.6(4) |
| Z | 2 | 4 | 4 |
| *D*c (g cm-3) | 1.33 | 1.13 | 1.17 |
| *μ* (mm-1) | 2.13 | 1.43 | 2.01 |
| *F* (000) | 1770 | 1588 | 3320 |
| ** Range (°) | 3.76 to 23.05 | 3.78 to 25.02 | 3.74 to 24.13 |
| Data Collected (hkl) | -13 to 12, -15 to 15, -27 to 27 | -14 to 14, -21 to 20, -23 to 21 | -29 to 26, -13 to 16, -28 to 25 |
| Reflections Collected | 34631 | 44698 | 41296 |
| Independent Reflections | 11404 | 7568 | 13369 |
| Rint | 0.073 | 0.115 | 0.186 |
| Final R1, *w*R2 [I > 2σ(I)] | 0.103, 0.208 | 0.058, 0.109 | 0.084, 0.140 |
| R1, *w*R2 (all data) | 0.129, 0.217 | 0.092, 0.121 | 0.173, 0.172 |
| Goodness of fit on *F*2 | 1.266 | 1.061 | 1.055 |
| Δ*ρ*max,min (e Å -3) | 1.21, -1.10 | 0.98, -0.45 | 0.81, -0.55 |

Table of crystallographic data for **15**, **16**

|  | 15 | 16 |
| --- | --- | --- |
| Formula | YC45H69N2O2 | SiC32H44N2 |
| M | 758.93 | 484.78 |
| Crystal Size (mm) | 0.20 x 0.15 x 0.02 | 0.35 x 0.35 x 0.30 |
| Crystal System | Monoclinic | Monoclinic |
| Space Group | P21/n (No.14) | P21/n (No.14) |
| *a* (Å) | 10.2131(3) | 16.7778(3) |
| *b* (Å) | 23.5543(6) | 9.6378(1) |
| *c* (Å) | 18.5374(7) | 19.7477(3) |
| *α* (°) | 90 | 90 |
| *β* (°) | 101.190(1) | 109.171(1) |
| *γ* (°) | 90 | 90 |
| U (Å3) | 4374.6(2) | 3016.14(8) |
| Z | 4 | 4 |
| *D*c (g cm-3) | 1.15 | 1.07 |
| *μ* (mm-1) | 1.37 | 0.1 |
| *F* (000) | 1632 | 1056 |
| ** Range (°) | 3.76 to 22.98 | 3.75 to 25.02 |
| Data Collected (hkl) | -10 to 11, -25 to 23, -17 to 18 | -19 to 19, -11 to 11, -23 to 20 |
| Reflections Collected | 19710 | 27657 |
| Independent Reflections | 5660 | 5266 |
| Rint | 0.1 | 0.061 |
| Final R1, *w*R2 [I > 2σ(I)] | 0.061, 0.122 | 0.041, 0.098 |
| R1, *w*R2 (all data) | 0.102, 0.142 | 0.054, 0.106 |
| Goodness of fit on *F*2 | 1.044 | 1.037 |
| Δ*ρ*max,min (e Å -3) | 0.69, -0.31 | 0.20, -0.26 |

## Synthesis of YI3

YI3 was prepared in a similar fashion to the literature method of F. T. Edelmann, in 'Synthetic Methods of Organometallic and Inorganic Chemistry', ed. G. Brauer and W. A. Herrmann, Georg Thieme Verlag, Stuttgart, 1997.

A thick-walled ampoule with two constrictions was charged with Y chips (1.00g, 11.25mmol) and excess HgI2 (25.0g, 55.0mmol) and dried *in vacuo* (10-6 mbar) for 2h. The ampoule was then flame-sealed under vacuum at the upper constriction and heated to 315 ˚C for 48h. The excess HgI2 and evolved Hg were removed by sublimation within the tube over a further 48h. The tube was opened in the glove box and the contents deposited in a tantalum boat, which was placed in a quartz tube equipped with a high vacuum tap and heated to 390 ˚C at 10-6 mbar for 4h to remove trace HgI2 and Hg. YI3 was collected as an off-white powder (5.28g, 11.25mmol, 100%).

## Potassium Menthoxide

A 3L round-bottomed flask with reflux sidearm was charged with potassium (40.1g, 1mol), menthol (128.3g, 0.821mol) and heptane (1.5L). The mixture was degassed under argon, a stillhead fitted, and heated to reflux for 24h. The resultant white suspension was cooled to room temperature and filtered to give a clear, very pale yellow solution. A 2mL aliquot was quenched with deionised water and titrated against hydrochloric acid using a phenolphthalein indicator to determine the molarity of the solution. The molarity was adjusted to approximately 0.5M and the solution stored at –20 °C.

### K2{ArN(CH2)2NAr} 4

nBuLi (5.84mL, 14.62mmol, 2.5M solution in hexane) was added dropwise over 15 minutes with stirring to a solution of **2** (2.78g, 7.31mmol) in 80mL hexanes at –78 °C, then stirred for a further 2h at room temperature. Potassium menthoxide (32.7mL, 14.62mmol, 0.447M solution in heptane) was added dropwise over 15 minutes with stirring to the resultant off-white suspension at –45 °C, which deposited a bright yellow precipitate. The resultant bright yellow suspension was stirred overnight at room temperature, poured onto a glass frit in the glove box, washed with hexanes (3  40mL), dried on the frit for 2.5h and collected as a bright yellow powder (2.593g, 5.680mmol, 78%).

Characterising data for **4**: 1H NMR (*d*6-benzene with 5 drops *d*8-THF):  7.08 (d, 1H *m*-C6*H*3(C3H7)2), 6.96 (d, 3H, *m*-C6*H*3(C3H7)2), 6.13, (t, 2H, *p*-C6*H*3(C3H7)2), 3.90 (s, 4H, C*H*(CH3)2), 3.51 (s (br) N(C*H*)2N), 1.31 (d, 24H, CH(C*H*3)2); 13C{1H} NMR (*d*6-benzene with 5 drops *d*8-THF):  123.8, 123.4 (*C*6H3(C3H7)2), 56.2 (N(*C*H2)2N), 28.8, 27.9 (*C*H(CH3)2), 24.9, 23.7 (CH(*C*H3)2); 7Li NMR (*d*6-benzene): no resonances observed; 7Li NMR (*d*6-benzene with 5 drops *d*8-THF):  2.18 (sharp and of low intensity); Elemental analysis: calculated: C: 68.36%, H: 8.38%, N: 6.13%; found: C: 68.81%, H: 8.67%, N: 6.20%.

### [{Y{ArN(CH2)2NAr}I(THF)2}2] 10

YI3 (0.720g, 1.533mmol) and **4** (0.700g, 1.533mmol) were slurried in THF (75mL, 0 °C). The resultant white suspension was stirred overnight at room temperature. The solvent was removed under reduced pressure and the residue dried *in vacuo* for 1h. Toluene (60mL) was added, and the resultant yellow/grey suspension filtered to yield a clear, yellow solution. The solution was cooled to -42 °C to yield the product as colourless crystals (0.748g, 0.876mmol, 57%).

Characterising data for **10**: 1H NMR (*d*6-benzene):  7.00 – 7.20 (m, residual protons from *d*6-benzene, C6*H*3(C3H7)2, Toluene), 4.17 (sept, 4H, C*H*(CH3)2), 3.93 (s, 4H, N(C*H*2)2N), 3.60 (s, 8H, THF), 3.43 (m, 0.7H, C*H*(CH3)2, N*H* **2**), 3.07 (m, 0.55H, N(C*H*2)2N **2**), 2.17 (s, Toluene), 1.41 (d, 24H, CH(C*H*3)2), 1.12 (m, THF, CH(C*H*3)2); 13C{1H} NMR (*d*6-benzene):  142.7, 124.0, (*C*6H3(C3H7)2), (THF), 52.4 (N(*C*H2)2N **2**), 24.8 (THF), 24.2 (CH(*C*H3)2 **2**); 1H NMR (*d*6-benzene with 3 drops *d*8-THF):  7.10 – 7.30 (m, residual protons from *d*6-benzene, C6*H*3(C3H7)2), 4.19 (sept, 4H, C*H*(CH3)2), 3.92 (s, 4H, N(C*H*2)2N), 3.55 (m, 8H, THF), 3.43 (m, 0.45H, C*H*(CH3)2, N*H* **2**), 3.07 (m, 0.3H, N(C*H*2)2N **2**), 2.10 (s, Toluene), 1.40, (m, 32H, THF, CH(C*H*3)2), 1.21 (d, 1.8H, CH(C*H*3)2 **2**); 13C{1H} NMR (*d*6-benzene with 3 drops *d*8-THF):  156.1, 145.3, 123.6, 122.3, 67.2 (THF, *d*8-THF), 60.5, (N(*C*H2)2N), 28.0 (*C*H(CH3)2), 25.8 (THF, *d*8-THF), 24.5 (CH(*C*H3)2); Elemental analysis: calculated: C: 55.29%, H: 7.37%, N: 3.79%; found: C: 55.04%, H: 7.40%, N: 3.77%.

### [Y{ArN(CH2)2NAr}{CH(SiMe3)2}(THF)] 11

**10** (0.200g, 0.117mmol) and KCH(SiMe3)2 (0.046g, 0.234mmol) were dissolved in toluene (50mL, 0 °C). The resultant pale yellow suspension was stirred for 3h at room temperature, the solvent removed under reduced pressure and the residue dried *in vacuo* for 1h. Pentane (50mL) was added, and the suspension filtered to yield a clear, pale yellow solution. The solution was cooled to –45 °C overnight to yield the product as colourless crystals (0.089g, 0.127mmol, 54%).

Characterising data for **11**: 1H NMR (*d*6-benzene):  7.20 (m, residual protons from *d*6-benzene, C6*H*3(C3H7)2), 3.80 (m, 12H, C*H*(CH3)2), N(C*H*2)2N, THF), 1.40, 1.22 (m, 28H, CH(C*H*3)2, THF), 0.00 (s, 18H, Si*Me*3), -0.89 (d, 2*J*YH = 1.8 Hz, 1H, C*H*(SiMe3)2;); 1H NMR (*d*6-benzene with 3 drops *d*8-THF):  7.15 (m, 6H, C6*H*3(C3H7)2), 4.17 (sept, 4H, C*H*(CH3)2), 4.00 (s, 4H, N(C*H*2)2N), 3.56 (m, 4H, THF), 1.27 (m, 28H, CH(C*H*3)2, THF), 0.36 (s, 18H, Si*Me*3), -0.97 (d, 2*J*YH = 2.3 Hz, 1H, C*H*(SiMe3)2;); 13C{1H} NMR (*d*6-benzene):  152.8, 144.5, 123.6, 123.3 (*C*6H3(C3H7)2), 71.2 (THF), 58.8 (N(*C*H2)2N), 36.7 (d, 1*J*YC = 42 Hz), 34.4 (unassigned), 28.5 (*C*H(CH3)2), 25.7 (THF), 24.9 (CH(*C*H3)2), 22.7, 14.2 (unassigned), 4.6 (CH(Si*C*H3)2); Elemental analysis: calculated: C: 63.58%, H: 9.37%, N: 4.01%; found: C: 63.56, 63.36%, H: 9.13, 9.16%, N: 4.22, 4.21%.

### [Y{ArN(CH2)2NAr}(CH2C6H5)(THF)2] 12

**10** (0.200g, 0.117mmol) and KCH2C6H5 (0.031g, 0.234mmol) were dissolved in diethyl ether (40mL, 0 °C; the preparation also works with similar yield in THF). The resultant deep red solution rapidly changed to an off-white suspension, which was warmed to room temperature and stirred for 3h. The solvent was removed under reduced pressure and the yellow/green residue dried *in vacuo* for 0.5h. Pentane (50mL) was added and stirred for two hours, yielding a pale yellow/green suspension, which was filtered to give a very pale yellow/green solution. The solvent volume was reduced to 20mL and the product recovered as a pale yellow microcrystalline solid (60g, 0.365mmol, 36.5%), which co-crystallises with approximately a quarter of an equivalent of **2**.

Characterising data for **12**: 1H NMR (*d*6-benzene):  7.00 - 7.30 (m, residual protons from *d*6-benzene, C6*H*3(C3H7)2), 6.83 (m, 2H, *m*-CH2C6*H*5), 6.50 (d, 2H, *o*-CH2C6*H*5), 6.32 (t, 1H, *p*-CH2C6*H*5), 4.50 (s (br), 4H, C*H*(CH3)2), 4.02 (s, 4H, N(C*H*2)2N), 3.40 (m, 11.6H, THF, N(C*H*2)2N **2**, N*H* **2**), 3.07 (m, 0.7H, C*H*(CH3)2 **2**), 2.39 (d, 2*J*YH = 2.09Hz, 2H, YC*H*2C6H5), (m, 41H, THF, CH(C*H*3)2, CH(C*H*3)2 **2**); 1H NMR (*d*6-benzene with three drops *d*8-THF):  7.00 - 7.30 (m, residual protons from *d*6-benzene, C6*H*3(C3H7)2), 6.83 (m, 2H, *m*-CH2C6*H*5), 6.50 (d, 2H, *o*-CH2C6*H*5), 6.32 (t, 1H, *p*-CH2C6*H*5), 4.50 (s (br), 4H, C*H*(CH3)2), 4.02 (s, 4H, N(C*H*2)2N), 3.40 (m, 11.6H, THF, N(C*H*2)2N **2**, N*H* **2**), 3.07 (m, 0.7H, C*H*(CH3)2 **2**, N*H* **2**), 2.39 (d, 2*J*YH = 2.09Hz, YC*H*2C6H5), (m, 41H, THF, CH(C*H*3)2, CH(C*H*3)2 **2**); 13C{1H} NMR (*d*6-benzene with three drops *d*8-THF):  155.7, 153.8, 145.3, 143.7, 142.8, 131.1, 129.3, 124.5, 123.9, 123.7, 123.6, 123.4, 123.3, 122.2, 121.1, 116.0 (*C*6H3(C3H7)2, CH2*C*6H5, *C*6H3(C3H7)2 **2**), 67.1 (m, THF), 60.9 (N(*C*H2)2N), 52.7 (N(*C*H2)2N **2**), 50.8 (d, 1*J*Y-C = 38 Hz, *C*H2C6H5), 28.5 (*C*H(CH3)2), 28.1, (*C*H(CH3)2 **2**), 25.8 (CH(*C*H3)2, CH(*C*H3)2 **2**), 24.4 (m, THF); Elemental analysis: calculated: C: 70.06%, H: 8.75%, N: 3.99%; found: C: 69.49, 69.62%, H: 8.42, 8.59%, N: 4.27, 4.39%.

## [Y{ArN(CH2)2NAr}{N(SiMe3)2}(THF)] 13

**10** (0.200g, 0.117mmol) and KN(SiMe3)2 (0.047g, 0.234mmol) were dissolved in toluene (50mL, 0 °C). The resultant very pale yellow suspension was stirred for 4h at room temperature, the solvent removed under reduced pressure and the residue dried *in vacuo* for 1h. Pentane (50mL) was added, and the suspension filtered to yield a clear, pale yellow solution. The solvent volume was reduced to 20mL and the solution cooled to –85 °C to yield the product as colourless crystals (0.050g, 0.071mmol, 30%) which co-crystallises with approximately an eighth of an equivalent of **2**.

Characterising data for **13**: 1H NMR (*d*6-benzene):  7.10 – 7.25 (m, residual protons from *d*6-benzene, C6*H*3(C3H7)2), 3.84 (s (br), 12H, C*H*(CH3)2), N(C*H*2)2N, THF), 1.41 (s (br), 24H, CH(C*H*3)2), 1.23 (s, 4H, THF), 0.01 (s, 18H, Si*Me*3); 1H NMR (*d*6-benzene with 3 drops *d*8-THF):  7.15 (m, 6H, C6*H*3(C3H7)2), 3.89 (sept, 4H, C*H*(CH3)2), 3.82 (s, 4H, N(C*H*2)2N), 3.52 (m, 4H, THF), 3.42 (m, 1.2H, C*H*(CH3)2, N*H* **2**), 3.08 (m, 0.8H, N(C*H*2)2N **2**), 1.43 (s, 4H, THF), 1.37 (d, 24H, CH(C*H*3)2), 1.21 (d, 6H, CH(C*H*3)2 **2**), 0.02 (s, 18H, Si*Me*3); 13C{1H} NMR (*d*6-benzene):  153.8, 144.7, 143.7, 142.8, 124.5, 124.0, 123.5, 123.2 (*C*6H3(C3H7)2), 71.9 (THF), 59.3 (N(*C*H2)2N), 52.6 (N(*C*H2)2N **2**), 34.4 (unassigned), 28.3 (*C*H(CH3)2), 28.1 (*C*H(CH3)2 **2**), 26.2 (THF), 25.1 (CH(*C*H3)2), 24.0 (CH(*C*H3)2 **2**), 14.2 (unassigned), 4.1 (Si*Me*3); Elemental analysis: calculated: C: 61.77%, H: 9.22%, N: 6.00%; found: C: 61.50, 61.51%, H: 9.00, 9.06%, N: 5.83, 5.79%.

## Crystal Data and Structure Refinements

## [Y{ArN(CH2)3NAr}(CH2C6H5)(THF)2] 7

Identification code sep1702

Empirical formula C42 H63 N2 O2 Y

Formula weight 716.85

Temperature 173(2) K

Wavelength 0.71073 Å

Crystal system Monoclinic

Space group P21  (No.4)

Unit cell dimensions a = 9.1530(2) Å α = 90°.

b = 19.1733(4) Å β = 99.595(1)°.

c = 11.5265(3) Å γ = 90°.

Volume 1994.52(8) Å3

Z 2

Density (calculated) 1.19 Mg/m3

Absorption coefficient 1.50 mm-1

F(000) 768

Crystal size 0.3 x 0.3 x 0.2 mm3

Theta range for data collection 3.74 to 25.02°.

Index ranges -10<=h<=10, -22<=k<=22, -12<=l<=13

Reflections collected 13142

Independent reflections 6240 [R(int) = 0.049]

Reflections with I>2sigma(I) 5548

Completeness to theta = 25.02° 98.5 %

Tmax. and Tmin. 0.724 and 0.622

Refinement method Full-matrix least-squares on F2

Data / restraints / parameters 6240 / 1 / 424

Goodness-of-fit on F2 1.041

Final R indices [I>2sigma(I)] R1 = 0.042, wR2 = 0.092

R indices (all data) R1 = 0.052, wR2 = 0.097

Absolute structure parameter -0.016(6)

Largest diff. peak and hole 0.32 and -0.27 e.Å-3

Data collection KappaCCD , Program package WinGX , Abs correction MULTISCAN

Refinement using SHELXL-97 , Drawing using ORTEP-3 for Windows (20% ellipsoids)

Table 2. Atomic coordinates ( x 104) and equivalent isotropic displacement parameters (Å2x 103)

for sep1702. U(eq) is defined as one third of the trace of the orthogonalized Uij tensor.

________________________________________________________________________________

x y z U(eq)

________________________________________________________________________________

Y 1518(1) 3927(1) 3041(1) 29(1)

O(1) 2703(5) 4620(2) 4720(3) 62(1)

O(2) 3412(4) 3198(2) 4098(3) 55(1)

N(1) 1369(4) 3217(2) 1511(3) 31(1)

N(2) 1147(4) 4858(2) 1927(3) 30(1)

C(1) 442(5) 3450(2) 415(4) 41(1)

C(2) -522(4) 4076(2) 548(3) 32(1)

C(3) 249(5) 4773(2) 741(4) 36(1)

C(4) 1982(4) 2546(2) 1420(4) 32(1)

C(5) 3394(5) 2458(2) 1071(4) 42(1)

C(6) 4012(5) 1794(3) 1110(5) 55(1)

C(7) 3292(5) 1214(3) 1437(5) 52(1)

C(8) 1875(5) 1292(2) 1694(4) 43(1)

C(9) 1205(5) 1941(2) 1680(4) 34(1)

C(10) 4182(5) 3060(3) 582(5) 54(1)

C(11) 5838(6) 3074(4) 990(8) 101(3)

C(12) 3879(8) 3059(3) -788(6) 78(2)

C(13) -389(5) 1974(2) 1887(4) 41(1)

C(14) -558(7) 1679(3) 3090(6) 68(2)

C(15) -1391(5) 1580(3) 916(6) 68(2)

C(16) 1822(5) 5529(2) 2041(4) 31(1)

C(17) 1063(5) 6111(2) 2380(4) 35(1)

C(18) 1771(5) 6755(2) 2510(4) 45(1)

C(19) 3187(6) 6841(3) 2294(5) 54(1)

C(20) 3928(6) 6273(3) 1938(5) 53(1)

C(21) 3284(5) 5620(2) 1809(4) 38(1)

C(22) -519(5) 6062(3) 2593(4) 40(1)

C(23) -1531(6) 6543(3) 1787(7) 79(2)

C(24) -625(9) 6226(4) 3884(6) 88(2)

C(25) 4153(5) 5016(2) 1423(5) 47(1)

C(26) 5623(8) 4899(5) 2241(8) 111(3)

C(27) 4428(10) 5099(4) 169(7) 100(3)

C(28) -772(5) 3617(3) 3772(4) 50(1)

C(29) -1084(4) 3892(4) 4902(3) 43(1)

C(30) -1664(5) 4548(3) 5004(4) 45(1)

C(31) -1901(7) 4815(3) 6062(5) 62(1)

C(32) -1623(9) 4415(4) 7074(5) 80(2)

C(33) -1069(10) 3764(3) 7003(5) 89(2)

C(34) -817(7) 3497(3) 5939(4) 63(2)

C(35) 2568(11) 4392(5) 5890(5) 130(4)

C(36) 3364(14) 4839(6) 6711(6) 150(5)

C(37) 3796(9) 5433(4) 6085(6) 96(2)

C(38) 3469(13) 5269(4) 4871(7) 117(4)

C(39) 3123(11) 2550(4) 4641(9) 102(3)

C(40) 4343(11) 2135(6) 4770(12) 167(5)

C(41) 5581(9) 2532(6) 4509(10) 143(4)

C(42) 4983(7) 3268(5) 4183(10) 124(4)

________________________________________________________________________________

Table 3. Bond lengths [Å] and angles [°] for sep1702.

| Y-N(2) | 2.191(3) | C(32)-C(33) | 1.355(9) | C(4)-C(9)-C(13) | 121.8(4) |
| --- | --- | --- | --- | --- | --- |
| Y-N(1) | 2.215(4) | C(33)-C(34) | 1.383(7) | C(11)-C(10)-C(5) | 114.3(5) |
| Y-O(2) | 2.396(3) | C(35)-C(36) | 1.389(10) | C(11)-C(10)-C(12) | 108.4(5) |
| Y-O(1) | 2.447(3) | C(36)-C(37) | 1.439(12) | C(5)-C(10)-C(12) | 111.1(4) |
| Y-C(28) | 2.458(4) | C(37)-C(38) | 1.417(11) | C(9)-C(13)-C(15) | 109.9(4) |
| O(1)-C(38) | 1.424(9) | C(39)-C(40) | 1.359(12) | C(9)-C(13)-C(14) | 111.9(4) |
| O(1)-C(35) | 1.442(7) | C(40)-C(41) | 1.437(12) | C(15)-C(13)-C(14) | 110.0(5) |
| O(2)-C(42) | 1.431(7) | C(41)-C(42) | 1.537(12) | C(17)-C(16)-C(21) | 118.7(4) |
| O(2)-C(39) | 1.436(8) | N(2)-Y-N(1) | 92.92(14) | C(17)-C(16)-N(2) | 121.1(4) |
| N(1)-C(4) | 1.414(5) | N(2)-Y-O(2) | 143.22(13) | C(21)-C(16)-N(2) | 120.2(4) |
| N(1)-C(1) | 1.469(6) | N(1)-Y-O(2) | 89.37(13) | C(18)-C(17)-C(16) | 119.5(4) |
| N(2)-C(16) | 1.424(5) | N(2)-Y-O(1) | 91.53(12) | C(18)-C(17)-C(22) | 118.7(4) |
| N(2)-C(3) | 1.482(5) | N(1)-Y-O(1) | 157.50(14) | C(16)-C(17)-C(22) | 121.8(4) |
| C(1)-C(2) | 1.513(6) | O(2)-Y-O(1) | 74.12(12) | C(19)-C(18)-C(17) | 121.7(4) |
| C(2)-C(3) | 1.509(6) | N(2)-Y-C(28) | 109.90(16) | C(18)-C(19)-C(20) | 119.0(4) |
| C(4)-C(9) | 1.420(6) | N(1)-Y-C(28) | 100.47(14) | C(21)-C(20)-C(19) | 121.7(5) |
| C(4)-C(5) | 1.427(6) | O(2)-Y-C(28) | 105.72(16) | C(20)-C(21)-C(16) | 119.4(4) |
| C(5)-C(6) | 1.390(7) | O(1)-Y-C(28) | 98.70(15) | C(20)-C(21)-C(25) | 119.3(4) |
| C(5)-C(10) | 1.519(7) | C(38)-O(1)-C(35) | 105.5(5) | C(16)-C(21)-C(25) | 121.3(4) |
| C(6)-C(7) | 1.375(7) | C(38)-O(1)-Y | 135.6(4) | C(23)-C(22)-C(17) | 111.6(4) |
| C(7)-C(8) | 1.387(7) | C(35)-O(1)-Y | 118.7(4) | C(23)-C(22)-C(24) | 109.7(5) |
| C(8)-C(9) | 1.386(6) | C(42)-O(2)-C(39) | 107.8(6) | C(17)-C(22)-C(24) | 111.1(5) |
| C(9)-C(13) | 1.518(6) | C(42)-O(2)-Y | 127.9(4) | C(21)-C(25)-C(27) | 112.3(4) |
| C(10)-C(11) | 1.510(8) | C(39)-O(2)-Y | 123.8(4) | C(21)-C(25)-C(26) | 112.5(5) |
| C(10)-C(12) | 1.557(9) | C(4)-N(1)-C(1) | 113.1(3) | C(27)-C(25)-C(26) | 109.6(6) |
| C(13)-C(15) | 1.524(7) | C(4)-N(1)-Y | 130.2(3) | C(29)-C(28)-Y | 121.2(3) |
| C(13)-C(14) | 1.529(7) | C(1)-N(1)-Y | 116.6(3) | C(30)-C(29)-C(34) | 115.8(4) |
| C(16)-C(17) | 1.404(6) | C(16)-N(2)-C(3) | 110.5(3) | C(30)-C(29)-C(28) | 122.3(5) |
| C(16)-C(21) | 1.419(6) | C(16)-N(2)-Y | 131.3(3) | C(34)-C(29)-C(28) | 121.9(6) |
| C(17)-C(18) | 1.391(6) | C(3)-N(2)-Y | 117.3(3) | C(31)-C(30)-C(29) | 122.4(4) |
| C(17)-C(22) | 1.511(6) | N(1)-C(1)-C(2) | 114.7(3) | C(30)-C(31)-C(32) | 120.5(5) |
| C(18)-C(19) | 1.370(7) | C(3)-C(2)-C(1) | 116.8(4) | C(33)-C(32)-C(31) | 118.5(5) |
| C(19)-C(20) | 1.382(8) | N(2)-C(3)-C(2) | 114.0(3) | C(32)-C(33)-C(34) | 120.9(5) |
| C(20)-C(21) | 1.380(7) | N(1)-C(4)-C(9) | 120.6(4) | C(33)-C(34)-C(29) | 121.7(5) |
| C(21)-C(25) | 1.513(6) | N(1)-C(4)-C(5) | 121.3(4) | C(36)-C(35)-O(1) | 109.5(7) |
| C(22)-C(23) | 1.512(7) | C(9)-C(4)-C(5) | 118.1(4) | C(35)-C(36)-C(37) | 107.7(6) |
| C(22)-C(24) | 1.540(8) | C(6)-C(5)-C(4) | 118.8(5) | C(38)-C(37)-C(36) | 106.8(6) |
| C(25)-C(27) | 1.517(8) | C(6)-C(5)-C(10) | 119.6(4) | C(37)-C(38)-O(1) | 109.5(7) |
| C(25)-C(26) | 1.525(8) | C(4)-C(5)-C(10) | 121.5(4) | C(40)-C(39)-O(2) | 110.3(8) |
| C(28)-C(29) | 1.477(6) | C(7)-C(6)-C(5) | 122.5(5) | C(39)-C(40)-C(41) | 109.2(8) |
| C(29)-C(30) | 1.378(8) | C(6)-C(7)-C(8) | 118.7(4) | C(40)-C(41)-C(42) | 106.1(6) |
| C(29)-C(34) | 1.401(7) | C(9)-C(8)-C(7) | 121.5(4) | O(2)-C(42)-C(41) | 104.1(6) |
| C(30)-C(31) | 1.373(7) | C(8)-C(9)-C(4) | 120.0(4) |  |  |
| C(31)-C(32) | 1.384(8) | C(8)-C(9)-C(13) | 118.1(4) |  |  |

Table 4. Anisotropic displacement parameters (Å2x 103)for sep1702. The anisotropic

displacement factor exponent takes the form: -22[ h2a*2U11 + ... + 2 h k a* b* U12 ]

______________________________________________________________________________

U11 U22 U33 U23 U13 U12

______________________________________________________________________________

Y 37(1) 24(1) 27(1) -1(1) 3(1) -2(1)

O(1) 87(3) 56(2) 36(2) -11(2) -14(2) -22(2)

O(2) 55(2) 49(2) 56(2) 10(2) -6(2) 5(2)

N(1) 38(2) 26(2) 29(2) -1(2) 5(2) 3(2)

N(2) 36(2) 20(2) 34(2) 1(2) 3(2) -6(2)

C(1) 53(3) 32(2) 35(2) -5(2) 3(2) 1(2)

C(2) 32(2) 35(3) 28(2) 0(2) 1(2) -2(2)

C(3) 42(2) 32(2) 32(2) 6(2) 1(2) -2(2)

C(4) 34(2) 27(2) 33(2) -8(2) 1(2) 1(2)

C(5) 36(2) 30(2) 60(3) -14(2) 8(2) -4(2)

C(6) 35(3) 42(3) 88(4) -15(3) 9(3) 3(2)

C(7) 44(3) 31(3) 79(4) -3(3) 6(3) 11(2)

C(8) 52(3) 26(2) 50(3) -3(2) 8(2) 2(2)

C(9) 36(2) 30(2) 35(2) -6(2) 5(2) 1(2)

C(10) 42(3) 32(3) 93(4) -16(3) 27(3) -10(2)

C(11) 47(3) 74(5) 185(8) -18(5) 24(4) -18(3)

C(12) 99(5) 48(4) 102(5) -9(3) 58(4) -11(3)

C(13) 48(3) 28(2) 49(3) -5(2) 16(2) -5(2)

C(14) 82(4) 56(4) 80(4) 13(3) 53(4) 3(3)

C(15) 39(3) 66(4) 99(4) -37(3) 11(3) -6(3)

C(16) 34(2) 23(2) 35(2) 4(2) 5(2) -1(2)

C(17) 40(2) 28(2) 38(2) 0(2) 8(2) 0(2)

C(18) 55(3) 25(2) 58(3) -9(2) 15(2) -3(2)

C(19) 56(3) 27(3) 81(4) -3(2) 14(3) -12(2)

C(20) 38(3) 40(3) 80(4) 4(3) 11(3) -7(2)

C(21) 33(2) 29(2) 52(3) 5(2) 5(2) 1(2)

C(22) 41(3) 35(3) 48(3) -3(2) 20(2) -1(2)

C(23) 44(3) 65(4) 131(6) 28(4) 24(4) 17(3)

C(24) 125(6) 68(4) 88(5) -19(4) 70(4) -33(4)

C(25) 39(3) 29(2) 77(3) 6(2) 22(3) 0(2)

C(26) 75(5) 99(6) 146(7) -2(5) -16(5) 44(4)

C(27) 138(7) 77(5) 99(5) 29(4) 61(5) 53(5)

C(28) 63(3) 48(3) 46(3) -8(2) 29(2) -11(2)

C(29) 59(2) 34(2) 38(2) -9(3) 16(2) -16(3)

C(30) 57(3) 45(3) 35(2) -1(2) 12(2) -8(2)

C(31) 92(4) 36(3) 60(3) -8(2) 19(3) 6(3)

C(32) 152(7) 54(4) 41(3) -11(3) 38(4) -7(4)

C(33) 186(7) 45(5) 41(3) 8(2) 38(4) 0(4)

C(34) 112(5) 35(3) 48(3) 4(2) 29(3) 7(3)

C(35) 190(9) 151(8) 44(4) -4(4) 8(5) -98(7)

C(36) 272(14) 123(8) 47(4) -27(5) 2(6) -52(8)

C(37) 112(6) 84(5) 81(5) -40(4) -15(4) -13(4)

C(38) 198(10) 62(5) 73(5) -2(4) -30(6) -43(6)

C(39) 120(6) 60(5) 116(6) 47(5) -9(5) 3(5)

C(40) 116(8) 106(8) 268(15) 96(9) -1(9) 41(6)

C(41) 75(5) 153(9) 203(10) 94(8) 32(6) 56(6)

C(42) 43(4) 127(8) 198(9) 67(7) 10(5) 7(4)

Table 5. Hydrogen coordinates ( x 104) and isotropic displacement parameters (Å2x 103)

for sep1702.

________________________________________________________________________________

x y z U(eq)

________________________________________________________________________________

H(1A) -204 3059 89 49

H(1B) 1093 3565 -162 49

H(2A) -1284 4111 -168 39

H(2B) -1045 3989 1220 39

H(3A) 903 4832 145 43

H(3B) -506 5147 615 43

H(6) 4967 1738 904 66

H(7) 3758 770 1485 62

H(8) 1351 892 1885 51

H(10) 3767 3503 850 64

H(11A) 6264 3476 640 152

H(11B) 6277 2644 744 152

H(11C) 6048 3112 1849 152

H(12A) 4398 3452 -1080 117

H(12B) 2812 3103 -1068 117

H(12C) 4237 2621 -1077 117

H(13) -704 2474 1856 49

H(14A) -1597 1712 3193 102

H(14B) 61 1947 3709 102

H(14C) -247 1190 3138 102

H(15A) -2419 1606 1052 102

H(15B) -1082 1090 921 102

H(15C) -1318 1789 152 102

H(18) 1259 7145 2754 54

H(19) 3653 7285 2388 65

H(20) 4905 6332 1778 63

H(22) -867 5572 2424 48

H(23A) -2545 6497 1947 118

H(23B) -1507 6418 966 118

H(23C) -1196 7026 1927 118

H(24A) -1660 6188 3998 132

H(24B) -266 6700 4074 132

H(24C) -18 5893 4400 132

H(25) 3543 4586 1450 57

H(26A) 6139 4502 1959 166

H(26B) 5435 4802 3038 166

H(26C) 6238 5318 2252 166

H(27A) 4985 4696 -45 150

H(27B) 4999 5526 105 150

H(27C) 3477 5129 -365 150

H(28A) -1610 3757 3158 60

H(28B) -799 3102 3823 60

H(30) -1909 4826 4317 54

H(31) -2259 5278 6100 75

H(32) -1818 4592 7803 96

H(33) -849 3487 7694 106

H(34) -454 3034 5911 76

H(35A) 1511 4392 5982 156

H(35B) 2953 3911 6019 156

H(36A) 4251 4599 7136 180

H(36B) 2743 4989 7291 180

H(37A) 3239 5852 6258 115

H(37B) 4869 5526 6321 115

H(38A) 4399 5238 4542 140

H(38B) 2848 5641 4446 140

H(39A) 2846 2642 5421 123

H(39B) 2283 2309 4149 123

H(40A) 4160 1731 4230 201

H(40B) 4563 1956 5586 201

H(41A) 5981 2320 3845 171

H(41B) 6379 2550 5203 171

H(42A) 5383 3609 4800 148

H(42B) 5248 3420 3424 148

## [Y{ArN(CH2)3NAr}{N(SiMe3)2}(THF)] 8

Identification code jul1102

Empirical formula C37 H66 N3 O Si2 Y

Formula weight 714.02

Temperature 173(2) K

Wavelength 0.71073 Å

Crystal system Monoclinic

Space group P21 (No.4)

Unit cell dimensions a = 11.0609(4) Å α = 90°.

b = 17.1207(6) Å β = 106.524(2)°.

c = 11.3288(4) Å γ = 90°.

Volume 2056.74(13) Å3

Z 2

Density (calculated) 1.15 Mg/m3

Absorption coefficient 1.51 mm-1

F(000) 768

Crystal size 0.3 x 0.3 x 0.2 mm3

Theta range for data collection 3.75 to 23.52°.

Index ranges -12<=h<=11, -19<=k<=19, -10<=l<=12

Reflections collected 10087

Independent reflections 5629 [R(int) = 0.042]

Reflections with I>2sigma(I) 5132

Completeness to theta = 23.52° 95.9 %

Tmax. and Tmin. 0.79 and 0.59

Refinement method Full-matrix least-squares on F2

Data / restraints / parameters 5629 / 1 / 397

Goodness-of-fit on F2 1.030

Final R indices [I>2sigma(I)] R1 = 0.042, wR2 = 0.096

R indices (all data) R1 = 0.050, wR2 = 0.101

Absolute structure parameter -0.019(6)

Largest diff. peak and hole 0.31 and -0.33 e.Å-3

Data collection KappaCCD , Program package WinGX , Abs correction MULTISCAN

Refinement using SHELXL-97 , Drawing using ORTEP-3 for Windows(20% ellipsoids)

Table 2. Atomic coordinates ( x 104) and equivalent isotropic displacement parameters (Å2x 103)

for jul1102. U(eq) is defined as one third of the trace of the orthogonalized Uij tensor.

________________________________________________________________________________

x y z U(eq)

________________________________________________________________________________

Y 7057(1) 9023(1) 2757(1) 34(1)

Si(1) 7733(2) 8152(1) 5529(1) 52(1)

Si(2) 6243(1) 9597(1) 5463(1) 43(1)

O 5880(3) 7898(2) 2136(4) 53(1)

N(1) 6144(4) 9893(2) 1377(4) 44(1)

N(2) 8725(3) 8878(2) 2095(3) 38(1)

N(3) 7017(3) 8970(3) 4749(3) 41(1)

C(1) 6477(6) 9874(4) 219(5) 62(2)

C(2) 7259(5) 9182(4) 35(4) 59(2)

C(3) 8604(4) 9136(3) 822(4) 45(1)

C(4) 5269(5) 10514(3) 1352(5) 43(1)

C(5) 3959(5) 10386(3) 895(5) 43(1)

C(6) 3133(5) 10996(3) 918(5) 50(1)

C(7) 3569(6) 11722(4) 1361(5) 62(2)

C(8) 4853(6) 11857(3) 1779(5) 60(2)

C(9) 5725(6) 11268(3) 1776(5) 49(1)

C(10) 3418(5) 9600(3) 366(5) 51(1)

C(11) 2386(6) 9308(4) 911(6) 71(2)

C(12) 2879(7) 9624(4) -1033(6) 76(2)

C(13) 7141(6) 11435(4) 2266(6) 64(2)

C(14) 7514(9) 11635(8) 3615(8) 152(5)

C(15) 7519(8) 12100(5) 1537(10) 117(3)

C(16) 9994(4) 8661(3) 2721(4) 36(1)

C(17) 10478(4) 7935(3) 2476(4) 38(1)

C(18) 11691(5) 7722(3) 3151(5) 45(1)

C(19) 12443(5) 8212(4) 4052(5) 52(1)

C(20) 11963(5) 8920(4) 4263(5) 56(2)

C(21) 10756(5) 9166(3) 3616(4) 46(1)

C(22) 9707(4) 7359(3) 1537(4) 39(1)

C(23) 9576(6) 6570(3) 2115(6) 57(1)

C(24) 10279(5) 7233(3) 468(5) 54(1)

C(25) 10304(6) 9973(3) 3867(6) 60(2)

C(26) 10893(9) 10597(4) 3259(9) 103(3)

C(27) 10497(10) 10145(5) 5196(8) 108(3)

C(28) 8800(7) 7709(3) 4698(6) 69(2)

C(29) 8752(7) 8339(5) 7121(6) 81(2)

C(30) 6595(7) 7352(4) 5620(6) 74(2)

C(31) 7373(6) 10297(4) 6480(6) 66(2)

C(32) 5399(5) 9121(4) 6498(4) 57(1)

C(33) 4992(5) 10152(3) 4308(5) 59(2)

C(34) 6121(9) 7232(6) 1478(10) 136(5)

C(35) 5557(9) 6570(5) 1896(12) 123(4)

C(36) 4490(7) 6890(4) 2294(8) 81(2)

C(37) 4658(6) 7753(3) 2338(7) 70(2)

________________________________________________________________________________

Table 3. Bond lengths [Å] and angles [°] for jul1102.

| Y-N(1) | 2.188(4) | C(22)-C(24) | 1.533(7) | C(5)-C(4)-C(9) | 119.6(5) |
| --- | --- | --- | --- | --- | --- |
| Y-N(2) | 2.194(3) | C(25)-C(27) | 1.488(9) | C(5)-C(4)-N(1) | 120.6(5) |
| Y-N(3) | 2.272(3) | C(25)-C(26) | 1.515(9) | C(9)-C(4)-N(1) | 119.8(5) |
| Y-O | 2.320(3) | C(34)-C(35) | 1.437(13) | C(6)-C(5)-C(4) | 119.2(5) |
| Si(1)-N(3) | 1.723(5) | C(35)-C(36) | 1.482(10) | C(6)-C(5)-C(10) | 118.9(5) |
| Si(1)-C(28) | 1.866(6) | C(36)-C(37) | 1.489(8) | C(4)-C(5)-C(10) | 121.9(4) |
| Si(1)-C(29) | 1.862(7) |  |  | C(7)-C(6)-C(5) | 121.4(5) |
| Si(1)-C(30) | 1.883(7) | N(1)-Y-N(2) | 95.43(14) | C(6)-C(7)-C(8) | 119.7(5) |
| Si(2)-N(3) | 1.713(4) | N(1)-Y-N(3) | 127.00(16) | C(7)-C(8)-C(9) | 121.3(6) |
| Si(2)-C(33) | 1.870(6) | N(2)-Y-N(3) | 126.24(13) | C(8)-C(9)-C(4) | 118.7(6) |
| Si(2)-C(31) | 1.873(6) | N(1)-Y-O | 104.09(15) | C(8)-C(9)-C(13) | 120.0(5) |
| Si(2)-C(32) | 1.879(5) | N(2)-Y-O | 104.87(13) | C(4)-C(9)-C(13) | 121.3(5) |
| O-C(34) | 1.428(8) | N(3)-Y-O | 95.74(15) | C(5)-C(10)-C(11) | 112.6(5) |
| O-C(37) | 1.455(6) | N(3)-Si(1)-C(28) | 109.7(2) | C(5)-C(10)-C(12) | 112.2(4) |
| N(1)-C(4) | 1.433(6) | N(3)-Si(1)-C(29) | 114.8(3) | C(11)-C(10)-C(12) | 108.2(5) |
| N(1)-C(1) | 1.460(6) | C(28)-Si(1)-C(29) | 105.3(3) | C(14)-C(13)-C(9) | 111.5(5) |
| N(2)-C(16) | 1.430(6) | N(3)-Si(1)-C(30) | 113.7(3) | C(14)-C(13)-C(15) | 109.9(7) |
| N(2)-C(3) | 1.477(6) | C(28)-Si(1)-C(30) | 105.1(3) | C(9)-C(13)-C(15) | 110.5(6) |
| C(1)-C(2) | 1.516(8) | C(29)-Si(1)-C(30) | 107.6(3) | C(17)-C(16)-C(21) | 119.8(4) |
| C(2)-C(3) | 1.503(7) | N(3)-Si(2)-C(33) | 111.0(2) | C(17)-C(16)-N(2) | 120.3(4) |
| C(4)-C(5) | 1.411(7) | N(3)-Si(2)-C(31) | 110.8(2) | C(21)-C(16)-N(2) | 119.8(4) |
| C(4)-C(9) | 1.418(8) | C(33)-Si(2)-C(31) | 109.7(3) | C(18)-C(17)-C(16) | 118.9(4) |
| C(5)-C(6) | 1.392(7) | N(3)-Si(2)-C(32) | 115.2(3) | C(18)-C(17)-C(22) | 118.4(4) |
| C(5)-C(10) | 1.525(8) | C(33)-Si(2)-C(32) | 104.9(3) | C(16)-C(17)-C(22) | 122.7(4) |
| C(6)-C(7) | 1.375(8) | C(31)-Si(2)-C(32) | 104.8(3) | C(17)-C(18)-C(19) | 121.7(5) |
| C(7)-C(8) | 1.383(8) | C(34)-O-C(37) | 105.5(5) | C(20)-C(19)-C(18) | 118.6(5) |
| C(8)-C(9) | 1.396(8) | C(34)-O-Y | 130.5(4) | C(19)-C(20)-C(21) | 122.4(5) |
| C(9)-C(13) | 1.533(8) | C(37)-O-Y | 124.0(3) | C(20)-C(21)-C(16) | 118.6(5) |
| C(10)-C(11) | 1.527(8) | C(4)-N(1)-C(1) | 110.0(4) | C(20)-C(21)-C(25) | 119.5(5) |
| C(10)-C(12) | 1.527(8) | C(4)-N(1)-Y | 133.7(3) | C(16)-C(21)-C(25) | 121.9(5) |
| C(13)-C(14) | 1.505(10) | C(1)-N(1)-Y | 116.3(3) | C(17)-C(22)-C(23) | 112.1(4) |
| C(13)-C(15) | 1.533(10) | C(16)-N(2)-C(3) | 111.4(3) | C(17)-C(22)-C(24) | 111.6(4) |
| C(16)-C(17) | 1.412(7) | C(16)-N(2)-Y | 131.4(3) | C(23)-C(22)-C(24) | 109.0(4) |
| C(16)-C(21) | 1.413(7) | C(3)-N(2)-Y | 116.6(3) | C(27)-C(25)-C(26) | 111.3(6) |
| C(17)-C(18) | 1.391(7) | Si(2)-N(3)-Si(1) | 119.1(2) | C(27)-C(25)-C(21) | 114.1(6) |
| C(17)-C(22) | 1.522(7) | Si(2)-N(3)-Y | 126.7(2) | C(26)-C(25)-C(21) | 110.4(5) |
| C(18)-C(19) | 1.398(8) | Si(1)-N(3)-Y | 113.9(2) | O-C(34)-C(35) | 107.1(6) |
| C(19)-C(20) | 1.371(8) | N(1)-C(1)-C(2) | 116.2(4) | C(34)-C(35)-C(36) | 105.5(7) |
| C(20)-C(21) | 1.393(7) | C(3)-C(2)-C(1) | 117.7(5) | C(37)-C(36)-C(35) | 105.9(6) |
| C(21)-C(25) | 1.524(7) | N(2)-C(3)-C(2) | 113.2(4) | O-C(37)-C(36) | 106.0(5) |
| C(22)-C(23) | 1.527(7) |  |  |  |  |

Table 4. Anisotropic displacement parameters (Å2x 103)for jul1102. The anisotropic

displacement factor exponent takes the form: -22[ h2a*2U11 + ... + 2 h k a* b* U12 ]

______________________________________________________________________________

U11 U22 U33 U23 U13 U12

______________________________________________________________________________

Y 32(1) 43(1) 33(1) -1(1) 16(1) 1(1)

Si(1) 60(1) 61(1) 42(1) 8(1) 26(1) 10(1)

Si(2) 39(1) 56(1) 37(1) -10(1) 15(1) -1(1)

O 49(2) 55(2) 67(2) -15(2) 34(2) -15(2)

N(1) 41(2) 58(3) 34(2) 2(2) 15(2) 9(2)

N(2) 33(2) 45(3) 39(2) -1(2) 16(2) 3(2)

N(3) 47(2) 46(2) 36(2) -7(2) 19(2) -3(2)

C(1) 58(4) 100(5) 30(3) 14(3) 16(3) 32(3)

C(2) 49(3) 95(5) 35(3) -3(3) 15(2) 16(3)

C(3) 47(3) 50(3) 45(3) 3(3) 24(2) 11(3)

C(4) 47(3) 51(3) 36(3) 6(2) 21(2) 6(2)

C(5) 37(3) 54(3) 41(3) 9(2) 18(2) 7(2)

C(6) 41(3) 60(3) 52(3) 9(3) 18(3) 7(3)

C(7) 73(4) 61(4) 61(4) 0(3) 32(3) 21(3)

C(8) 81(5) 55(4) 51(4) -4(3) 31(3) 1(3)

C(9) 49(3) 61(4) 41(3) -2(3) 21(3) 2(3)

C(10) 42(3) 49(3) 64(4) 15(3) 19(3) 8(2)

C(11) 46(3) 81(5) 88(5) 10(3) 23(3) -8(3)

C(12) 104(5) 57(4) 69(4) -5(3) 25(4) -8(4)

C(13) 57(4) 77(4) 63(4) -13(3) 28(3) -18(3)

C(14) 90(6) 297(14) 71(6) -57(7) 26(5) -84(8)

C(15) 87(6) 121(7) 156(9) 22(6) 55(6) -29(5)

C(16) 28(2) 44(3) 39(3) 0(2) 16(2) -4(2)

C(17) 33(3) 48(3) 37(3) 2(2) 15(2) -4(2)

C(18) 33(3) 56(3) 46(3) 6(2) 15(2) 5(2)

C(19) 33(3) 70(4) 49(3) 1(3) 3(2) -1(3)

C(20) 38(3) 81(4) 47(3) -12(3) 9(2) -15(3)

C(21) 44(3) 50(4) 46(3) -7(2) 18(2) -7(2)

C(22) 34(3) 42(3) 45(3) -1(2) 16(2) 1(2)

C(23) 54(3) 51(3) 67(4) -4(3) 19(3) -2(3)

C(24) 50(3) 65(4) 52(3) -13(3) 19(3) -3(3)

C(25) 51(3) 62(4) 70(4) -28(3) 25(3) -13(3)

C(26) 139(8) 54(4) 140(8) -9(4) 81(7) -1(5)

C(27) 149(8) 96(6) 94(6) -37(5) 59(6) 4(5)

C(28) 94(5) 63(4) 67(4) 24(3) 49(4) 31(3)

C(29) 71(4) 118(6) 51(4) 13(4) 12(3) 32(4)

C(30) 97(5) 63(4) 72(4) 18(3) 40(4) 3(4)

C(31) 66(4) 61(4) 72(4) -26(3) 22(3) -5(3)

C(32) 45(3) 87(4) 40(3) -3(3) 14(2) 3(3)

C(33) 48(3) 67(4) 66(4) 3(3) 24(3) 5(3)

C(34) 103(7) 159(9) 183(10) -129(8) 100(7) -65(6)

C(35) 94(7) 63(5) 227(12) -59(6) 72(7) -13(5)

C(36) 65(4) 71(4) 114(6) -13(4) 36(4) -18(3)

C(37) 46(3) 59(4) 121(6) 4(4) 51(4) 0(3)

Table 5. Hydrogen coordinates ( x 104) and isotropic displacement parameters (Å2x 103)

for jul1102.

________________________________________________________________________________

x y z U(eq)

________________________________________________________________________________

H(1A) 6948 10357 161 74

H(1B) 5688 9882 -467 74

H(2A) 6823 8700 174 70

H(2B) 7263 9178 -838 70

H(3A) 9071 8769 439 54

H(3B) 8998 9658 848 54

H(6) 2250 10909 622 60

H(7) 2990 12128 1380 75

H(8) 5149 12362 2075 71

H(10) 4119 9209 571 61

H(11A) 2072 8803 545 106

H(11B) 1692 9686 733 106

H(11C) 2733 9250 1804 106

H(12A) 2548 9107 -1333 115

H(12B) 3547 9769 -1404 115

H(12C) 2198 10010 -1259 115

H(13) 7609 10954 2155 76

H(14A) 8424 11731 3901 228

H(14B) 7300 11199 4079 228

H(14C) 7061 12104 3744 228

H(15A) 8430 12190 1847 176

H(15B) 7068 12577 1633 176

H(15C) 7302 11957 663 176

H(18) 12018 7232 2996 53

H(19) 13268 8058 4509 63

H(20) 12472 9255 4873 67

H(22) 8843 7582 1192 47

H(23A) 9065 6220 1484 85

H(23B) 9166 6642 2769 85

H(23C) 10414 6341 2465 85

H(24A) 9756 6865 -123 82

H(24B) 11134 7021 785 82

H(24C) 10315 7733 57 82

H(25) 9374 9990 3463 72

H(26A) 10733 10476 2383 154

H(26B) 11805 10614 3653 154

H(26C) 10523 11106 3349 154

H(27A) 10183 10670 5285 162

H(27B) 11398 10116 5632 162

H(27C) 10037 9761 5544 162

H(28A) 8318 7593 3847 104

H(28B) 9161 7224 5112 104

H(28C) 9480 8076 4700 104

H(29A) 9354 8756 7103 122

H(29B) 9212 7862 7453 122

H(29C) 8225 8498 7643 122

H(30A) 6047 7238 4793 110

H(30B) 6079 7521 6148 110

H(30C) 7066 6881 5968 110

H(31A) 8023 10004 7089 99

H(31B) 6917 10635 6905 99

H(31C) 7772 10617 5979 99

H(32A) 6002 8817 7133 85

H(32B) 4740 8775 6011 85

H(32C) 5016 9524 6890 85

H(33A) 5368 10421 3735 88

H(33B) 4610 10536 4734 88

H(33C) 4342 9789 3850 88

H(34A) 7041 7151 1643 163

H(34B) 5748 7306 581 163

H(35A) 6174 6309 2592 147

H(35B) 5252 6187 1223 147

H(36A) 3676 6746 1700 97

H(36B) 4507 6685 3116 97

H(37A) 3979 8008 1689 84

H(37B) 4640 7960 3149 84

## [Y{ArN(CH2)3NAr}{OAr*}(THF)] (OAr* = OC6H2-2,6-tBu-4-Me)

Identification code mar902

Empirical formula C46 H63 N2 O2 Y

Formula weight 764.89

Temperature 173(2) K

Wavelength 0.71073 Å

Crystal system Monoclinic

Space group P21/n (No.14)

Unit cell dimensions a = 9.7063(2) Å α = 90°.

b = 24.9099(6) Å β = 97.802(1)°.

c = 18.6024(4) Å γ = 90°.

Volume 4456.1(2) Å3

Z 4

Density (calculated) 1.14 Mg/m3

Absorption coefficient 1.34 mm-1

F(000) 1632

Crystal size 0.2 x 0.2 x 0.2 mm3

Theta range for data collection 3.76 to 24.14°.

Index ranges -11<=h<=10, -28<=k<=28, -20<=l<=21

Reflections collected 26024

Independent reflections 6731 [R(int) = 0.097]

Reflections with I>2sigma(I) 4644

Completeness to theta = 24.14° 94.6 %

Tmax. and Tmin. 0.796 and 0.723

Refinement method Full-matrix least-squares on F2

Data / restraints / parameters 6731 / 0 / 461

Goodness-of-fit on F2 1.053

Final R indices [I>2sigma(I)] R1 = 0.061, wR2 = 0.116

R indices (all data) R1 = 0.106, wR2 = 0.136

Extinction coefficient 0.0012(4)

Largest diff. peak and hole 0.48 and -0.37 e.Å-3

Data collection KappaCCD , Program package WinGX , Abs correction MULTISCAN

Refinement using SHELXL-97 , Drawing using ORTEP-3 for Windows (20% ellipsoids)

Table 2. Atomic coordinates ( x 104) and equivalent isotropic displacement parameters (Å2x 103)

for mar902. U(eq) is defined as one third of the trace of the orthogonalized Uij tensor.

________________________________________________________________________________

x y z U(eq)

________________________________________________________________________________

Y 5064(1) 1414(1) 2513(1) 28(1)

O(1) 6247(3) 1224(1) 1688(2) 33(1)

O(2) 2931(3) 1207(1) 1846(2) 41(1)

N(1) 5320(4) 958(2) 3510(2) 34(1)

N(2) 4707(4) 2186(2) 3015(2) 39(1)

C(1) 4721(6) 1194(2) 4132(3) 44(1)

C(2) 3634(6) 1615(2) 3910(3) 45(1)

C(3) 4164(7) 2166(2) 3722(3) 57(2)

C(4) 6109(6) 487(2) 3718(2) 40(1)

C(5) 5415(7) -11(2) 3731(3) 49(2)

C(6) 6190(9) -471(2) 3899(3) 69(2)

C(7) 7606(10) -447(3) 4063(4) 80(2)

C(8) 8312(8) 39(3) 4071(3) 69(2)

C(9) 7561(6) 514(2) 3905(3) 46(1)

C(10) 3842(7) -52(2) 3570(3) 58(2)

C(11) 3185(8) -309(3) 4176(3) 73(2)

C(12) 3350(10) -345(4) 2868(4) 129(4)

C(13) 8314(6) 1046(3) 3941(3) 56(2)

C(14) 9379(8) 1086(4) 3413(4) 106(3)

C(15) 8998(10) 1185(4) 4703(4) 107(3)

C(16) 5016(5) 2722(2) 2812(3) 37(1)

C(17) 6264(6) 2968(2) 3096(3) 43(1)

C(18) 6574(7) 3477(2) 2829(3) 55(2)

C(19) 5654(7) 3741(2) 2322(3) 58(2)

C(20) 4397(6) 3507(2) 2069(3) 47(1)

C(21) 4047(6) 3001(2) 2303(3) 40(1)

C(22) 7254(6) 2716(2) 3699(3) 53(2)

C(23) 8775(7) 2713(3) 3571(3) 84(2)

C(24) 7143(7) 3002(3) 4422(3) 64(2)

C(25) 2638(6) 2773(2) 2029(3) 55(2)

C(26) 1554(8) 2980(5) 2478(4) 128(4)

C(27) 2146(7) 2882(3) 1236(3) 68(2)

C(28) 6827(5) 1144(2) 1069(2) 31(1)

C(29) 7230(5) 1588(2) 674(2) 35(1)

C(30) 7780(5) 1485(2) 27(2) 40(1)

C(31) 7963(5) 976(2) -227(3) 41(1)

C(32) 7582(5) 551(2) 179(3) 43(1)

C(33) 7015(5) 611(2) 826(2) 37(1)

C(34) 7099(5) 2168(2) 937(3) 38(1)

C(35) 7949(6) 2243(2) 1689(3) 54(2)

C(36) 5573(6) 2315(2) 949(3) 50(2)

C(37) 7664(7) 2577(2) 435(3) 60(2)

C(38) 8546(7) 884(3) -934(3) 59(2)

C(39) 6597(6) 112(2) 1237(3) 45(1)

C(40) 5034(6) 111(3) 1284(3) 63(2)

C(41) 7426(7) 89(2) 2001(3) 61(2)

C(42) 6890(9) -415(2) 857(3) 77(2)

C(43) 2661(6) 1282(3) 1057(3) 60(2)

C(44) 1363(8) 957(4) 830(4) 114(4)

C(45) 688(8) 850(4) 1472(4) 104(3)

C(46) 1650(6) 1054(4) 2116(4) 88(3)

________________________________________________________________________________

Table 3. Bond lengths [Å] and angles [°] for mar902.

| Y-O(1) | 2.092(3) | C(34)-C(36) | 1.529(7) | C(17)-C(16)-N(2) | 120.8(5) |
| --- | --- | --- | --- | --- | --- |
| Y-N(1) | 2.160(4) | C(34)-C(37) | 1.531(7) | C(21)-C(16)-N(2) | 119.3(4) |
| Y-N(2) | 2.186(4) | C(34)-C(35) | 1.536(7) | C(16)-C(17)-C(18) | 118.5(5) |
| Y-O(2) | 2.324(3) | C(39)-C(40) | 1.531(8) | C(16)-C(17)-C(22) | 122.0(5) |
| O(1)-C(28) | 1.364(5) | C(39)-C(42) | 1.536(7) | C(18)-C(17)-C(22) | 119.4(5) |
| O(2)-C(46) | 1.453(7) | C(39)-C(41) | 1.537(7) | C(19)-C(18)-C(17) | 121.5(5) |
| O(2)-C(43) | 1.467(6) | C(43)-C(44) | 1.509(9) | C(20)-C(19)-C(18) | 119.7(5) |
| N(1)-C(4) | 1.426(6) | C(44)-C(45) | 1.462(10) | C(19)-C(20)-C(21) | 121.3(5) |
| N(1)-C(1) | 1.485(6) | C(45)-C(46) | 1.504(9) | C(20)-C(21)-C(16) | 119.0(5) |
| N(2)-C(16) | 1.430(6) | O(1)-Y-N(1) | 120.08(14) | C(20)-C(21)-C(25) | 119.0(5) |
| N(2)-C(3) | 1.481(6) | O(1)-Y-N(2) | 130.28(14) | C(16)-C(21)-C(25) | 122.0(5) |
| C(1)-C(2) | 1.506(7) | N(1)-Y-N(2) | 95.87(14) | C(17)-C(22)-C(23) | 114.6(5) |
| C(2)-C(3) | 1.523(7) | O(1)-Y-O(2) | 95.48(12) | C(17)-C(22)-C(24) | 110.1(5) |
| C(4)-C(9) | 1.406(7) | N(1)-Y-O(2) | 109.42(13) | C(23)-C(22)-C(24) | 108.9(5) |
| C(4)-C(5) | 1.412(7) | N(2)-Y-O(2) | 103.99(14) | C(21)-C(25)-C(27) | 114.6(5) |
| C(5)-C(6) | 1.384(8) | C(28)-O(1)-Y | 169.6(3) | C(21)-C(25)-C(26) | 110.6(5) |
| C(5)-C(10) | 1.519(8) | C(46)-O(2)-C(43) | 109.5(4) | C(27)-C(25)-C(26) | 109.0(6) |
| C(6)-C(7) | 1.368(10) | C(46)-O(2)-Y | 128.0(3) | O(1)-C(28)-C(29) | 120.0(4) |
| C(7)-C(8) | 1.390(10) | C(43)-O(2)-Y | 122.1(3) | O(1)-C(28)-C(33) | 119.4(4) |
| C(8)-C(9) | 1.402(8) | C(4)-N(1)-C(1) | 111.6(4) | C(29)-C(28)-C(33) | 120.6(4) |
| C(9)-C(13) | 1.511(8) | C(4)-N(1)-Y | 131.3(3) | C(30)-C(29)-C(28) | 117.9(5) |
| C(10)-C(11) | 1.510(8) | C(1)-N(1)-Y | 116.7(3) | C(30)-C(29)-C(34) | 120.1(4) |
| C(10)-C(12) | 1.516(8) | C(16)-N(2)-C(3) | 112.2(4) | C(28)-C(29)-C(34) | 122.0(4) |
| C(13)-C(15) | 1.522(8) | C(16)-N(2)-Y | 131.0(3) | C(31)-C(30)-C(29) | 123.1(5) |
| C(13)-C(14) | 1.523(8) | C(3)-N(2)-Y | 116.5(3) | C(30)-C(31)-C(32) | 117.6(4) |
| C(16)-C(17) | 1.397(7) | N(1)-C(1)-C(2) | 113.3(4) | C(30)-C(31)-C(38) | 121.3(5) |
| C(16)-C(21) | 1.421(7) | C(1)-C(2)-C(3) | 116.5(5) | C(32)-C(31)-C(38) | 121.1(5) |
| C(17)-C(18) | 1.408(7) | N(2)-C(3)-C(2) | 114.0(4) | C(31)-C(32)-C(33) | 123.7(5) |
| C(17)-C(22) | 1.511(7) | C(9)-C(4)-C(5) | 120.2(5) | C(32)-C(33)-C(28) | 117.2(5) |
| C(18)-C(19) | 1.376(8) | C(9)-C(4)-N(1) | 120.7(5) | C(32)-C(33)-C(39) | 120.1(5) |
| C(19)-C(20) | 1.376(8) | C(5)-C(4)-N(1) | 119.1(5) | C(28)-C(33)-C(39) | 122.7(4) |
| C(20)-C(21) | 1.392(7) | C(6)-C(5)-C(4) | 119.0(6) | C(36)-C(34)-C(37) | 106.2(5) |
| C(21)-C(25) | 1.504(7) | C(6)-C(5)-C(10) | 119.2(6) | C(36)-C(34)-C(35) | 111.0(4) |
| C(22)-C(23) | 1.527(8) | C(4)-C(5)-C(10) | 121.7(5) | C(37)-C(34)-C(35) | 106.4(4) |
| C(22)-C(24) | 1.538(7) | C(7)-C(6)-C(5) | 120.8(7) | C(36)-C(34)-C(29) | 110.6(4) |
| C(25)-C(27) | 1.512(8) | C(6)-C(7)-C(8) | 121.3(6) | C(37)-C(34)-C(29) | 112.3(4) |
| C(25)-C(26) | 1.520(9) | C(7)-C(8)-C(9) | 119.5(7) | C(35)-C(34)-C(29) | 110.3(4) |
| C(28)-C(29) | 1.412(7) | C(8)-C(9)-C(4) | 119.1(6) | C(40)-C(39)-C(42) | 105.8(5) |
| C(28)-C(33) | 1.422(7) | C(8)-C(9)-C(13) | 119.8(6) | C(40)-C(39)-C(41) | 110.2(5) |
| C(29)-C(30) | 1.403(7) | C(4)-C(9)-C(13) | 121.1(5) | C(42)-C(39)-C(41) | 106.7(5) |
| C(29)-C(34) | 1.537(7) | C(11)-C(10)-C(12) | 108.9(5) | C(40)-C(39)-C(33) | 111.1(4) |
| C(30)-C(31) | 1.373(7) | C(11)-C(10)-C(5) | 113.4(5) | C(42)-C(39)-C(33) | 112.5(4) |
| C(31)-C(32) | 1.381(7) | C(12)-C(10)-C(5) | 113.2(6) | C(41)-C(39)-C(33) | 110.4(5) |
| C(31)-C(38) | 1.519(7) | C(9)-C(13)-C(15) | 112.8(5) | O(2)-C(43)-C(44) | 103.9(5) |
| C(32)-C(33) | 1.397(7) | C(9)-C(13)-C(14) | 113.3(6) | C(45)-C(44)-C(43) | 108.6(6) |
| C(33)-C(39) | 1.541(7) | C(15)-C(13)-C(14) | 109.7(6) | C(44)-C(45)-C(46) | 106.9(6) |
|  |  | C(17)-C(16)-C(21) | 119.9(5) | O(2)-C(46)-C(45) | 106.3(5) |

Table 4. Anisotropic displacement parameters (Å2x 103)for mar902. The anisotropic

displacement factor exponent takes the form: -22[ h2a*2U11 + ... + 2 h k a* b* U12 ]

______________________________________________________________________________

U11 U22 U33 U23 U13 U12

______________________________________________________________________________

Y 35(1) 30(1) 21(1) 0(1) 8(1) -2(1)

O(1) 36(2) 38(2) 26(2) 0(2) 9(1) 1(2)

O(2) 39(2) 51(2) 31(2) -2(2) 2(2) -3(2)

N(1) 46(3) 34(2) 24(2) 2(2) 9(2) 0(2)

N(2) 61(3) 29(2) 28(2) -1(2) 15(2) -2(2)

C(1) 67(4) 44(3) 26(3) 7(2) 23(3) -2(3)

C(2) 61(4) 41(3) 39(3) 4(3) 23(3) 4(3)

C(3) 105(5) 34(3) 41(3) 2(3) 35(3) -3(3)

C(4) 59(4) 43(3) 19(2) 1(2) 10(2) 6(3)

C(5) 78(4) 43(4) 26(3) 1(2) 10(3) -3(3)

C(6) 123(7) 39(4) 49(4) 4(3) 20(4) 10(4)

C(7) 117(7) 58(5) 69(5) 11(4) 28(5) 41(5)

C(8) 74(5) 92(6) 43(4) 12(4) 17(3) 29(4)

C(9) 50(4) 62(4) 29(3) 5(3) 15(3) 11(3)

C(10) 83(5) 54(4) 34(3) 10(3) 0(3) -25(3)

C(11) 105(6) 70(5) 43(4) 4(3) 11(4) -18(4)

C(12) 155(9) 188(10) 46(4) -19(5) 25(5) -96(8)

C(13) 41(3) 84(5) 44(3) 7(3) 10(3) -6(3)

C(14) 97(6) 146(8) 85(6) -27(5) 49(5) -52(6)

C(15) 146(8) 124(7) 48(4) -4(4) 4(5) -50(6)

C(16) 52(3) 33(3) 29(2) -9(2) 15(2) -6(3)

C(17) 63(4) 43(3) 24(3) -7(2) 7(3) -7(3)

C(18) 69(4) 49(4) 46(3) -10(3) 7(3) -29(3)

C(19) 91(5) 40(3) 44(3) 3(3) 14(3) -15(3)

C(20) 69(4) 35(3) 37(3) 0(3) 7(3) 0(3)

C(21) 56(3) 30(3) 36(3) 2(2) 10(3) -2(3)

C(22) 71(4) 57(4) 30(3) -6(3) 1(3) -8(3)

C(23) 75(5) 120(7) 52(4) -12(4) 0(4) -6(5)

C(24) 95(5) 64(4) 31(3) -7(3) 3(3) -8(4)

C(25) 61(4) 40(3) 63(4) 5(3) -3(3) -9(3)

C(26) 71(5) 239(12) 80(6) -34(7) 34(5) -59(7)

C(27) 58(4) 77(5) 63(4) -7(4) -7(3) 9(4)

C(28) 32(3) 42(3) 20(2) -4(2) 7(2) 3(2)

C(29) 33(3) 45(3) 27(3) -1(2) 5(2) -1(2)

C(30) 42(3) 53(4) 26(3) -1(3) 13(2) -8(3)

C(31) 42(3) 55(4) 29(3) -5(3) 13(2) -4(3)

C(32) 48(3) 45(3) 34(3) -9(3) 5(3) 4(3)

C(33) 41(3) 50(3) 21(2) 1(2) 8(2) 4(3)

C(34) 45(3) 38(3) 33(3) -4(2) 15(2) -5(2)

C(35) 58(4) 63(4) 43(3) -10(3) 12(3) -10(3)

C(36) 64(4) 48(4) 40(3) 7(3) 12(3) 3(3)

C(37) 82(5) 50(4) 54(4) 3(3) 29(3) -12(3)

C(38) 74(4) 71(4) 39(3) -7(3) 28(3) 0(4)

C(39) 69(4) 40(3) 26(3) 2(2) 13(3) 9(3)

C(40) 64(4) 58(4) 70(4) 2(3) 22(3) -19(3)

C(41) 88(5) 62(4) 34(3) 12(3) 11(3) 18(4)

C(42) 146(7) 38(4) 53(4) 1(3) 37(4) 14(4)

C(43) 61(4) 85(5) 29(3) 3(3) -7(3) -13(3)

C(44) 64(5) 224(11) 56(4) -37(6) 8(4) -61(6)

C(45) 69(5) 165(9) 75(5) -1(5) -5(4) -38(6)

C(46) 34(3) 169(8) 64(4) 7(5) 13(3) -28(4)

______________________________________________________________________________

Table 5. Hydrogen coordinates ( x 104) and isotropic displacement parameters (Å2x 103)

for mar902.

________________________________________________________________________________

x y z U(eq)

________________________________________________________________________________

H(1A) 5479 1355 4473 53

H(1B) 4299 903 4393 53

H(2A) 3068 1660 4310 55

H(2B) 3010 1480 3484 55

H(3A) 3396 2429 3713 69

H(3B) 4912 2277 4109 69

H(6) 5732 -808 3900 83

H(7) 8116 -768 4175 96

H(8) 9295 49 4187 82

H(10) 3474 323 3514 70

H(11A) 2174 -321 4042 109

H(11B) 3411 -97 4621 109

H(11C) 3544 -674 4259 109

H(12A) 3761 -178 2470 193

H(12B) 2334 -325 2766 193

H(12C) 3637 -722 2915 193

H(13) 7597 1328 3796 67

H(14A) 9823 1440 3457 160

H(14B) 8914 1037 2916 160

H(14C) 10087 807 3525 160

H(15A) 9459 1535 4697 160

H(15B) 9688 910 4873 160

H(15C) 8289 1200 5030 160

H(18) 7438 3641 3004 66

H(19) 5886 4082 2146 70

H(20) 3755 3695 1729 57

H(22) 6961 2335 3749 64

H(23A) 9342 2538 3981 125

H(23B) 9095 3083 3526 125

H(23C) 8863 2516 3123 125

H(24A) 7775 2831 4811 96

H(24B) 6186 2976 4532 96

H(24C) 7397 3381 4384 96

H(25) 2695 2375 2094 67

H(26A) 647 2824 2296 192

H(26B) 1501 3372 2441 192

H(26C) 1817 2876 2987 192

H(27A) 1233 2716 1099 102

H(27B) 2812 2730 940 102

H(27C) 2075 3270 1155 102

H(30) 8038 1782 -247 48

H(32) 7712 197 9 51

H(35A) 7623 1989 2031 81

H(35B) 7831 2611 1858 81

H(35C) 8934 2177 1658 81

H(36A) 5158 2063 1263 75

H(36B) 5071 2295 456 75

H(36C) 5511 2680 1136 75

H(37A) 7558 2940 623 90

H(37B) 7146 2547 -53 90

H(37C) 8651 2505 416 90

H(38A) 8599 498 -1026 89

H(38B) 9479 1041 -900 89

H(38C) 7938 1054 -1333 89

H(38D) 8745 1231 -1147 89

H(38E) 7865 688 -1273 89

H(38F) 9406 674 -840 89

H(40A) 4796 -210 1546 94

H(40B) 4516 109 794 94

H(40C) 4791 433 1543 94

H(41A) 7148 -229 2255 92

H(41B) 7236 412 2272 92

H(41C) 8422 70 1963 92

H(42A) 6605 -719 1136 115

H(42B) 7887 -441 824 115

H(42C) 6367 -420 368 115

## [Y{ArN(CH2)3NAr}2K(Toluene)] 9

Identification code nov1502

Empirical formula C61 H88 K N4 Y

Formula weight 1005.36

Temperature 223(2) K

Wavelength 0.71073 Å

Crystal system Monoclinic

Space group P21/c (No.14)

Unit cell dimensions a = 12.2379(2) Å α = 90°.

b = 13.0294(2) Å β = 98.851(1)°.

c = 36.6872(6) Å γ = 90°.

Volume 5780.2(2) Å3

Z 4

Density (calculated) 1.16 Mg/m3

Absorption coefficient 1.12 mm-1

F(000) 2160

Crystal size 0.20 x 0.15 x 0.05 mm3

Theta range for data collection 3.72 to 22.61°.

Index ranges -10<=h<=13, -14<=k<=13, -39<=l<=38

Reflections collected 24408

Independent reflections 7471 [R(int) = 0.075]

Reflections with I>2sigma(I) 5283

Completeness to theta = 22.61° 97.6 %

Tmax. and Tmin. 0.906 and 0.833

Refinement method Full-matrix least-squares on F2

Data / restraints / parameters 7471 / 0 / 592

Goodness-of-fit on F2 1.062

Final R indices [I>2sigma(I)] R1 = 0.068, wR2 = 0.131

R indices (all data) R1 = 0.110, wR2 = 0.148

Largest diff. peak and hole 0.58 and -0.44 e.Å-3

The C6 ring of the toluene was included as a rigid body.

The molecules form an infinite chain along the ‘a’ axis .

Data collection KappaCCD , Program package WinGX , Abs correction MULTISCAN

Refinement using SHELXL-97 , Drawing using ORTEP-3 for Windows (20% ellipsoids)

Table 2. Atomic coordinates ( x 104) and equivalent isotropic displacement parameters (Å2x 103)

for nov1502. U(eq) is defined as one third of the trace of the orthogonalized Uij tensor.

________________________________________________________________________________

x y z U(eq)

________________________________________________________________________________

Y 2591(1) 3499(1) 8730(1) 37(1)

K 7205(2) 929(2) 8994(1) 103(1)

N(1) 2971(4) 4879(3) 9078(1) 43(1)

N(2) 4291(4) 2817(4) 8910(1) 42(1)

N(3) 2175(4) 3743(3) 8118(1) 47(1)

N(4) 1130(4) 2493(3) 8779(1) 44(1)

C(1) 4156(5) 5018(5) 9225(2) 51(2)

C(2) 4907(5) 4657(5) 8954(2) 55(2)

C(3) 5228(4) 3528(5) 8956(2) 51(2)

C(4) 2280(4) 5573(4) 9235(2) 44(1)

C(5) 1890(5) 6462(5) 9039(2) 60(2)

C(6) 1194(6) 7129(5) 9194(2) 72(2)

C(7) 903(6) 6943(5) 9534(2) 68(2)

C(8) 1290(5) 6086(5) 9726(2) 59(2)

C(9) 1972(5) 5389(4) 9583(1) 45(2)

C(10) 2205(9) 6732(5) 8661(2) 96(3)

C(11) 1381(9) 7422(6) 8419(2) 129(4)

C(12) 3344(8) 7231(7) 8704(3) 130(4)

C(13) 2388(5) 4450(4) 9808(1) 48(2)

C(14) 1454(5) 3829(5) 9927(2) 66(2)

C(15) 3216(5) 4760(5) 10149(2) 62(2)

C(16) 4621(5) 1804(5) 9010(2) 47(2)

C(17) 4617(5) 1014(5) 8741(2) 55(2)

C(18) 4858(6) 18(6) 8849(2) 75(2)

C(19) 5153(7) -241(5) 9216(2) 88(2)

C(20) 5213(6) 521(5) 9477(2) 74(2)

C(21) 4956(5) 1530(5) 9389(2) 52(2)

C(22) 4425(5) 1286(5) 8330(2) 68(2)

C(23) 3828(6) 432(6) 8089(2) 98(3)

C(24) 5536(6) 1526(7) 8208(2) 96(3)

C(25) 4994(5) 2310(5) 9701(1) 53(2)

C(26) 4161(6) 2059(5) 9955(2) 83(2)

C(27) 6150(6) 2388(5) 9924(2) 76(2)

C(28) 1779(5) 2812(5) 7918(2) 57(2)

C(29) 1534(5) 1929(4) 8164(2) 49(2)

C(30) 643(5) 2112(5) 8408(1) 51(2)

C(31) 2181(5) 4615(5) 7886(1) 53(2)

C(32) 1185(6) 5102(5) 7730(2) 57(2)

C(33) 1231(7) 5972(6) 7515(2) 75(2)

C(34) 2228(8) 6386(6) 7453(2) 90(2)

C(35) 3176(7) 5917(7) 7606(2) 88(2)

C(36) 3192(6) 5023(6) 7811(2) 68(2)

C(37) 63(6) 4711(5) 7791(2) 71(2)

C(38) -637(6) 5536(6) 7938(2) 104(3)

C(39) -586(7) 4253(6) 7428(2) 103(3)

C(40) 4286(6) 4479(7) 7927(2) 90(3)

C(41) 4513(7) 3754(8) 7618(2) 124(3)

C(42) 5260(7) 5214(8) 8033(2) 136(4)

C(43) 427(5) 2300(4) 9043(1) 42(1)

C(44) 677(5) 1504(5) 9303(2) 55(2)

C(45) -24(6) 1315(5) 9559(2) 63(2)

C(46) -965(6) 1895(6) 9565(2) 69(2)

C(47) -1213(5) 2676(5) 9317(2) 64(2)

C(48) -533(5) 2897(5) 9054(1) 47(2)

C(49) 1723(6) 865(5) 9310(2) 71(2)

C(50) 2059(7) 258(6) 9672(2) 105(3)

C(51) 1688(7) 121(6) 8991(2) 103(3)

C(52) -841(5) 3774(5) 8789(2) 56(2)

C(53) -976(6) 4786(5) 8990(2) 84(2)

C(54) -1893(5) 3514(6) 8518(2) 82(2)

C(55) 8763(10) -804(13) 8894(5) 306(17)

C(56) 8619(11) -507(8) 8525(5) 276(14)

C(57) 7797(13) -960(12) 8273(3) 196(6)

C(58) 7118(9) -1709(12) 8389(5) 224(8)

C(59) 7262(13) -2006(8) 8757(6) 212(9)

C(60) 8084(16) -1554(14) 9009(3) 370(20)

C(61) 6800(30) -2670(20) 8937(9) 500(30)

Table 3. Bond lengths [Å] and angles [°] for nov1502.

| Y-N(1) | 2.213(4) | C(40)-C(41) | 1.533(11) | C(18)-C(17)-C(16) | 120.1(6) |
| --- | --- | --- | --- | --- | --- |
| Y-N(3) | 2.246(4) | C(43)-C(44) | 1.410(8) | C(18)-C(17)-C(22) | 119.8(6) |
| Y-N(4) | 2.246(4) | C(43)-C(48) | 1.415(8) | C(16)-C(17)-C(22) | 120.0(6) |
| Y-N(2) | 2.265(4) | C(44)-C(45) | 1.388(8) | C(17)-C(18)-C(19) | 121.7(6) |
| K-C(55) | 3.014(11) | C(44)-C(49) | 1.525(9) | C(20)-C(19)-C(18) | 118.8(7) |
| K-C(18) | 3.078(8) | C(45)-C(46) | 1.381(9) | C(19)-C(20)-C(21) | 122.6(6) |
| K-C(46)’ | 3.090(7) | C(46)-C(47) | 1.368(9) | C(20)-C(21)-C(16) | 119.1(5) |
| K-C(47)’ | 3.102(7) | C(47)-C(48) | 1.399(8) | C(20)-C(21)-C(25) | 118.7(5) |
| K-C(19) | 3.150(8) | C(48)-C(52) | 1.510(8) | C(16)-C(21)-C(25) | 122.2(5) |
| K-C(17) | 3.163(6) | C(49)-C(51) | 1.518(9) | C(24)-C(22)-C(17) | 109.1(5) |
| K-C(56) | 3.219(11) | C(49)-C(50) | 1.544(9) | C(24)-C(22)-C(23) | 110.3(6) |
| K-C(20) | 3.272(7) | C(52)-C(53) | 1.532(8) | C(17)-C(22)-C(23) | 112.7(6) |
| K-C(24) | 3.358(7) | C(52)-C(54) | 1.538(8) | C(26)-C(25)-C(21) | 111.8(5) |
| K-C(16) | 3.371(6) | C(55)-C(56) | 1.39 | C(26)-C(25)-C(27) | 109.8(5) |
| K-C(21) | 3.394(6) | C(55)-C(60) | 1.39 | C(21)-C(25)-C(27) | 111.5(5) |
| N(1)-C(4) | 1.419(6) | C(56)-C(57) | 1.39 | N(3)-C(28)-C(29) | 114.2(4) |
| N(1)-C(1) | 1.478(7) | C(57)-C(58) | 1.39 | C(28)-C(29)-C(30) | 116.9(5) |
| N(2)-C(16) | 1.414(7) | C(58)-C(59) | 1.39 | N(4)-C(30)-C(29) | 111.5(4) |
| N(2)-C(3) | 1.463(7) | C(59)-C(61) | 1.27(2) | C(36)-C(31)-C(32) | 118.7(6) |
| N(3)-C(31) | 1.422(7) | C(59)-C(60) | 1.39 | C(36)-C(31)-N(3) | 120.2(6) |
| N(3)-C(28) | 1.461(7) | N(1)-Y-N(3) | 117.20(16) | C(32)-C(31)-N(3) | 121.2(5) |
| N(4)-C(43) | 1.413(6) | N(1)-Y-N(4) | 121.81(15) | C(33)-C(32)-C(31) | 119.2(6) |
| N(4)-C(30) | 1.484(6) | N(3)-Y-N(4) | 95.80(16) | C(33)-C(32)-C(37) | 118.5(6) |
| C(1)-C(2) | 1.529(7) | N(1)-Y-N(2) | 92.80(16) | C(31)-C(32)-C(37) | 122.3(6) |
| C(2)-C(3) | 1.522(8) | N(3)-Y-N(2) | 113.77(15) | C(34)-C(33)-C(32) | 121.7(7) |
| C(4)-C(9) | 1.405(7) | N(4)-Y-N(2) | 117.06(17) | C(35)-C(34)-C(33) | 118.6(7) |
| C(4)-C(5) | 1.407(8) | C(4)-N(1)-C(1) | 112.7(4) | C(34)-C(35)-C(36) | 122.9(7) |
| C(5)-C(6) | 1.397(9) | C(4)-N(1)-Y | 131.8(3) | C(35)-C(36)-C(31) | 118.8(7) |
| C(5)-C(10) | 1.539(9) | C(1)-N(1)-Y | 114.6(3) | C(35)-C(36)-C(40) | 118.9(7) |
| C(6)-C(7) | 1.371(9) | C(16)-N(2)-C(3) | 111.9(4) | C(31)-C(36)-C(40) | 122.2(6) |
| C(7)-C(8) | 1.364(8) | C(16)-N(2)-Y | 130.9(4) | C(32)-C(37)-C(38) | 112.8(6) |
| C(8)-C(9) | 1.390(8) | C(3)-N(2)-Y | 117.0(3) | C(32)-C(37)-C(39) | 110.8(6) |
| C(9)-C(13) | 1.521(8) | C(31)-N(3)-C(28) | 113.2(4) | C(38)-C(37)-C(39) | 109.3(6) |
| C(10)-C(12) | 1.524(11) | C(31)-N(3)-Y | 133.7(3) | C(36)-C(40)-C(42) | 113.4(8) |
| C(10)-C(11) | 1.529(11) | C(28)-N(3)-Y | 113.1(3) | C(36)-C(40)-C(41) | 109.5(6) |
| C(13)-C(14) | 1.517(8) | C(43)-N(4)-C(30) | 111.6(4) | C(42)-C(40)-C(41) | 110.6(7) |
| C(13)-C(15) | 1.535(7) | C(43)-N(4)-Y | 137.2(3) | C(44)-C(43)-N(4) | 120.2(5) |
| C(16)-C(17) | 1.427(8) | C(30)-N(4)-Y | 109.5(3) | C(44)-C(43)-C(48) | 118.6(5) |
| C(16)-C(21) | 1.431(7) | N(1)-C(1)-C(2) | 112.3(4) | N(4)-C(43)-C(48) | 121.2(5) |
| C(17)-C(18) | 1.377(9) | C(3)-C(2)-C(1) | 118.3(5) | C(45)-C(44)-C(43) | 119.8(6) |
| C(17)-C(22) | 1.530(8) | N(2)-C(3)-C(2) | 114.5(5) | C(45)-C(44)-C(49) | 119.7(6) |
| C(18)-C(19) | 1.379(9) | C(9)-C(4)-C(5) | 119.0(5) | C(43)-C(44)-C(49) | 120.5(5) |
| C(19)-C(20) | 1.374(9) | C(9)-C(4)-N(1) | 121.4(5) | C(46)-C(45)-C(44) | 121.2(6) |
| C(20)-C(21) | 1.379(8) | C(5)-C(4)-N(1) | 119.6(5) | C(47)-C(46)-C(45) | 119.7(6) |
| C(21)-C(25) | 1.524(8) | C(6)-C(5)-C(4) | 119.0(6) | C(46)-C(47)-C(48) | 121.2(6) |
| C(22)-C(24) | 1.528(9) | C(6)-C(5)-C(10) | 118.6(6) | C(47)-C(48)-C(43) | 119.5(6) |
| C(22)-C(23) | 1.533(9) | C(4)-C(5)-C(10) | 122.4(6) | C(47)-C(48)-C(52) | 118.9(6) |
| C(25)-C(26) | 1.520(8) | C(7)-C(6)-C(5) | 121.3(6) | C(43)-C(48)-C(52) | 121.6(5) |
| C(25)-C(27) | 1.526(8) | C(8)-C(7)-C(6) | 119.7(6) | C(51)-C(49)-C(44) | 114.2(6) |
| C(28)-C(29) | 1.520(8) | C(7)-C(8)-C(9) | 121.4(6) | C(51)-C(49)-C(50) | 108.0(6) |
| C(29)-C(30) | 1.532(7) | C(8)-C(9)-C(4) | 119.5(5) | C(44)-C(49)-C(50) | 114.1(6) |
| C(31)-C(36) | 1.412(8) | C(8)-C(9)-C(13) | 119.3(5) | C(48)-C(52)-C(53) | 112.1(5) |
| C(31)-C(32) | 1.415(8) | C(4)-C(9)-C(13) | 121.1(5) | C(48)-C(52)-C(54) | 110.5(5) |
| C(32)-C(33) | 1.387(9) | C(12)-C(10)-C(11) | 108.7(7) | C(53)-C(52)-C(54) | 111.0(5) |
| C(32)-C(37) | 1.514(9) | C(12)-C(10)-C(5) | 110.8(7) | C(56)-C(55)-C(60) | 120 |
| C(33)-C(34) | 1.383(10) | C(11)-C(10)-C(5) | 115.0(7) | C(57)-C(56)-C(55) | 120 |
| C(34)-C(35) | 1.354(10) | C(14)-C(13)-C(9) | 112.4(5) | C(56)-C(57)-C(58) | 120 |
| C(35)-C(36) | 1.387(9) | C(14)-C(13)-C(15) | 109.9(5) | C(57)-C(58)-C(59) | 120 |
| C(36)-C(40) | 1.516(9) | C(9)-C(13)-C(15) | 110.8(5) | C(61)-C(59)-C(60) | 106(2) |
| C(37)-C(38) | 1.523(9) | N(2)-C(16)-C(17) | 121.4(5) | C(61)-C(59)-C(58) | 134(2) |
| C(37)-C(39) | 1.560(9) | N(2)-C(16)-C(21) | 121.0(5) | C(60)-C(59)-C(58) | 120 |
| C(40)-C(42) | 1.532(11) | C(17)-C(16)-C(21) | 117.6(5) | C(59)-C(60)-C(55) | 120 |

Symmetry transformations used to generate equivalent atoms:

‘ x+1,y,z

Table 4. Anisotropic displacement parameters (Å2x 103)for nov1502. The anisotropic

displacement factor exponent takes the form: -22[ h2a*2U11 + ... + 2 h k a* b* U12 ]

______________________________________________________________________________

U11 U22 U33 U23 U13 U12

______________________________________________________________________________

Y 39(1) 44(1) 28(1) -2(1) 3(1) -1(1)

K 88(1) 95(1) 116(2) -15(1) -18(1) 12(1)

N(1) 41(3) 41(3) 46(3) -9(2) 6(2) -3(2)

N(2) 34(3) 56(3) 37(3) -4(2) 6(2) 2(3)

N(3) 54(3) 54(3) 32(2) 2(2) 0(2) -4(2)

N(4) 46(3) 50(3) 35(3) -11(2) 3(2) -6(2)

C(1) 51(4) 57(4) 46(3) -3(3) 6(3) -14(3)

C(2) 47(4) 70(5) 49(4) 10(3) 10(3) -5(3)

C(3) 35(3) 71(4) 47(3) 11(3) 11(3) 7(4)

C(4) 44(4) 39(4) 48(3) -12(3) -1(3) -3(3)

C(5) 84(5) 39(4) 56(4) -13(4) 7(3) -1(4)

C(6) 111(6) 37(4) 62(5) -1(4) -1(4) 9(4)

C(7) 74(5) 63(5) 65(5) -11(4) 4(4) 16(4)

C(8) 60(4) 68(5) 50(4) -13(4) 12(3) 5(4)

C(9) 44(4) 50(4) 41(3) -8(3) 4(3) -6(3)

C(10) 184(10) 46(5) 66(5) 4(4) 41(6) 13(5)

C(11) 225(12) 97(7) 56(5) 14(5) -12(6) 6(7)

C(12) 144(9) 117(8) 142(8) 56(7) 67(7) 13(7)

C(13) 52(4) 52(4) 42(3) -7(3) 10(3) 5(3)

C(14) 74(5) 68(5) 60(4) -2(3) 17(3) -14(4)

C(15) 66(5) 66(4) 51(4) -2(3) -2(3) 3(4)

C(16) 42(4) 53(4) 46(4) -4(3) 9(3) 5(3)

C(17) 50(4) 64(4) 50(4) -15(4) 9(3) 6(3)

C(18) 95(6) 63(5) 68(5) -21(4) 18(4) 10(4)

C(19) 136(7) 54(5) 72(5) -4(4) 12(5) 16(5)

C(20) 113(6) 57(5) 54(4) -2(4) 13(4) 22(4)

C(21) 63(4) 49(4) 44(3) 2(3) 9(3) 9(3)

C(22) 68(5) 90(5) 44(4) -17(4) 4(3) 19(4)

C(23) 98(6) 115(7) 76(5) -47(5) -7(4) 35(5)

C(24) 90(6) 145(7) 56(4) 2(5) 26(4) 24(6)

C(25) 74(5) 47(4) 37(3) -2(3) 9(3) 9(3)

C(26) 121(7) 70(5) 65(4) -8(4) 37(4) 12(5)

C(27) 92(6) 71(5) 57(4) -5(4) -16(4) 14(4)

C(28) 58(4) 74(5) 38(3) -9(3) 4(3) 6(4)

C(29) 51(4) 53(4) 42(3) -13(3) 6(3) -3(3)

C(30) 53(4) 53(4) 46(3) -16(3) 6(3) -11(3)

C(31) 65(5) 66(4) 27(3) 4(3) 3(3) -13(4)

C(32) 71(5) 59(4) 39(3) 2(3) 1(3) -2(4)

C(33) 84(6) 80(5) 56(4) 16(4) -1(4) 2(4)

C(34) 122(8) 96(6) 53(4) 27(4) 20(5) -8(6)

C(35) 90(6) 118(7) 57(5) 26(5) 12(4) -27(5)

C(36) 72(5) 98(6) 32(3) 21(4) 4(3) -13(4)

C(37) 69(5) 60(5) 80(5) 17(4) 2(4) 4(4)

C(38) 87(6) 90(6) 141(8) 24(6) 37(5) 10(5)

C(39) 91(6) 89(6) 110(6) 15(5) -44(5) -11(5)

C(40) 60(5) 151(8) 60(5) 46(5) 11(4) -7(5)

C(41) 96(7) 174(10) 111(7) 50(7) 48(5) 34(6)

C(42) 74(6) 248(12) 86(6) 71(7) 8(5) -44(7)

C(43) 47(4) 43(4) 36(3) -8(3) 3(3) -8(3)

C(44) 61(4) 53(4) 53(4) -5(4) 12(3) -9(4)

C(45) 79(5) 57(4) 51(4) 2(3) 6(4) -17(4)

C(46) 71(5) 88(6) 54(4) -1(4) 22(4) -21(4)

C(47) 60(5) 79(5) 56(4) -8(4) 19(3) -6(4)

C(48) 42(4) 56(4) 42(3) -8(3) 7(3) -15(3)

C(49) 87(6) 55(4) 70(5) 12(4) 11(4) -8(4)

C(50) 100(7) 89(6) 124(7) 56(5) 15(5) 12(5)

C(51) 122(7) 66(5) 125(7) -2(5) 33(6) 21(5)

C(52) 45(4) 67(5) 56(4) 0(3) 13(3) 2(3)

C(53) 88(6) 80(5) 88(5) 0(4) 20(4) 16(4)

C(54) 53(4) 113(6) 76(5) 14(5) 0(4) -6(4)

C(55) 270(30) 330(30) 300(30) -170(20) -40(20) 140(30)

C(56) 164(19) 178(15) 490(40) -150(20) 70(20) -39(13)

C(57) 198(17) 164(14) 230(17) 14(14) 40(15) 10(11)

C(58) 227(18) 181(17) 290(30) 20(15) 136(17) -10(14)

C(59) 230(20) 130(12) 320(20) 84(16) 160(20) 61(13)

C(60) 126(16) 166(19) 850(70) 20(30) 140(30) 35(14)

C(61) 600(50) 290(30) 760(60) 250(30) 550(50) 170(30)

## [{Y{ArN(CH2)2NAr}I(THF)2}2(C6H5CH3)2.5] 10

Identification code sep2002

Empirical formula C68 H108 I2 N4 O4 Y2 . 2.5(C7 H8)

Formula weight 1707.54

Temperature 223(2) K

Wavelength 0.71073 Å

Crystal system Triclinic

Space group P-1 (No.2)

Unit cell dimensions a = 12.2250(4) Å α = 78.418(1)°.

b = 14.2440(4) Å β = 80.205(1)°.

c = 25.3516(9) Å γ = 85.201(2)°.

Volume 4256.0(2) Å3

Z 2

Density (calculated) 1.33 Mg/m3

Absorption coefficient 2.13 mm-1

F(000) 1770

Crystal size 0.20 x 0.15 x 0.05 mm3

Theta range for data collection 3.76 to 23.05°.

Index ranges -13<=h<=12, -15<=k<=15, -27<=l<=27

Reflections collected 34631

Independent reflections 11404 [R(int) = 0.073]

Reflections with I>2sigma(I) 9046

Completeness to theta = 23.05° 95.7 %

Tmax. and Tmin. 0.821 and 0.706

Refinement method Full-matrix least-squares on F2

Data / restraints / parameters 11404 / 27 / 760

Goodness-of-fit on F2 1.266

Final R indices [I>2sigma(I)] R1 = 0.103, wR2 = 0.208

R indices (all data) R1 = 0.129, wR2 = 0.217

Largest diff. peak and hole 1.21 and -1.10 e.Å-3

There are two independent dimers both lying on inversion centers. In one molecule, one of the thf groups is disordered, only the major components are shown in the Figure. There are two poorly defined toluene solvate molecules in general positions and one disordered across an inversion center.

Data collection KappaCCD , Program package WinGX , Abs correction MULTISCAN

Refinement using SHELXL-97 , Drawing using ORTEP-3 for Windows (20% ellipsoids)

Table 2. Atomic coordinates ( x 104) and equivalent isotropic displacement parameters (Å2x 103)

for sep2002. U(eq) is defined as one third of the trace of the orthogonalized Uij tensor.

________________________________________________________________________________

x y z U(eq)

________________________________________________________________________________

I 669(1) 4162(1) 600(1) 47(1)

Y -542(1) 6169(1) 615(1) 33(1)

O(1) -1860(8) 7403(6) 302(4) 46(3)

O(2) -2228(7) 5354(7) 930(4) 46(2)

N(1) 969(8) 7000(7) 492(4) 32(3)

N(2) -640(9) 6497(8) 1441(4) 37(3)

C(1) 867(12) 7544(11) 937(6) 47(4)

C(2) 354(13) 7000(12) 1476(6) 57(4)

C(3) 2013(11) 7099(10) 147(6) 40(3)

C(4) 2082(11) 7734(10) -366(6) 43(4)

C(5) 3129(15) 7858(12) -705(8) 71(5)

C(6) 4071(14) 7317(15) -523(8) 71(5)

C(7) 3976(13) 6773(14) -45(9) 69(5)

C(8) 2990(11) 6603(11) 310(6) 47(4)

C(9) 1093(13) 8333(10) -566(7) 55(4)

C(10) 992(18) 8334(15) -1156(8) 88(6)

C(11) 1065(18) 9354(11) -468(8) 81(6)

C(12) 2962(13) 5893(12) 837(7) 57(4)

C(13) 3439(15) 6341(15) 1253(8) 86(6)

C(14) 3560(15) 4947(13) 782(9) 81(6)

C(15) -1261(11) 6224(11) 1977(6) 44(4)

C(16) -1031(12) 5320(11) 2304(6) 43(4)

C(17) -1595(16) 5128(14) 2823(7) 71(5)

C(18) -2391(18) 5750(18) 3050(8) 85(7)

C(19) -2585(14) 6580(17) 2724(8) 74(6)

C(20) -2074(12) 6876(13) 2192(7) 60(5)

C(21) -191(14) 4584(12) 2107(7) 62(5)

C(22) -680(16) 3620(12) 2150(8) 75(5)

C(23) 824(17) 4460(17) 2383(11) 111(8)

C(24) -2386(19) 7784(17) 1872(9) 96(7)

C(25) -1910(20) 8657(17) 2035(11) 131(10)

C(26) -3641(19) 8010(20) 1868(12) 142(12)

C(27) -1754(12) 8409(10) 278(7) 55(4)

C(30) -2815(13) 7338(13) 39(8) 69(5)

C(31) -3170(13) 5731(13) 1274(8) 69(5)

C(32) -3584(15) 4899(16) 1678(8) 84(6)

C(33) -3355(16) 4069(16) 1371(8) 88(6)

C(34) -2524(15) 4420(12) 895(8) 71(6)

C(28) -2050(30) 8850(30) -318(17) 104(14)

C(29) -2740(40) 8090(30) -461(19) 119(16)

C(28A) -2950(30) 8810(20) 407(15) 45(10)

C(29A) -3600(30) 8090(20) 268(15) 48(11)

I(1B) -4042(1) -405(1) 4369(1) 46(1)

Y(1B) -5132(1) 1639(1) 4433(1) 31(1)

O(1B) -6683(8) 1132(6) 4101(4) 47(3)

O(2B) -6628(7) 2660(6) 4775(4) 46(3)

N(1B) -4658(8) 2571(7) 3629(4) 31(2)

N(2B) -3703(9) 2338(7) 4577(4) 32(3)

C(1B) -3654(11) 3094(10) 3594(5) 38(3)

C(2B) -3496(11) 3223(8) 4152(5) 34(3)

C(3B) -5012(11) 2722(9) 3116(5) 34(3)

C(4B) -5697(11) 3538(9) 2936(5) 35(3)

C(5B) -6077(11) 3641(10) 2443(6) 43(4)

C(6B) -5800(13) 2958(11) 2118(6) 49(4)

C(7B) -5121(13) 2185(10) 2278(6) 46(4)

C(8B) -4719(12) 2047(9) 2755(6) 42(4)

C(9B) -5982(11) 4320(9) 3278(6) 47(4)

C(10B) -7234(13) 4523(12) 3420(8) 64(5)

C(11B) -5461(14) 5257(11) 2974(7) 61(5)

C(12B) -3948(13) 1180(10) 2911(6) 53(4)

C(13B) -2784(15) 1359(16) 2573(9) 97(7)

C(14B) -4333(18) 250(12) 2818(8) 86(6)

C(15B) -2872(11) 2129(9) 4919(6) 37(3)

C(16B) -3066(12) 2336(9) 5453(6) 40(3)

C(17B) -2192(16) 2146(12) 5764(6) 56(5)

C(18B) -1226(14) 1799(10) 5573(7) 48(4)

C(19B) -989(12) 1576(11) 5072(7) 56(4)

C(20B) -1821(11) 1722(9) 4733(6) 40(4)

C(21B) -4170(12) 2814(9) 5663(6) 44(4)

C(22B) -4066(16) 3921(10) 5553(7) 66(5)

C(23B) -4599(16) 2436(12) 6264(7) 72(5)

C(24B) -1540(12) 1432(10) 4182(6) 47(4)

C(25B) -749(14) 2124(14) 3773(8) 78(6)

C(26B) -1001(14) 407(12) 4220(8) 72(5)

C(27B) -7438(12) 1798(11) 3803(7) 54(4)

C(28B) -7640(13) 1333(13) 3357(7) 63(5)

C(29B) -7596(15) 267(14) 3621(8) 73(5)

C(30B) -7033(15) 186(12) 4096(8) 73(6)

C(31B) -7745(12) 2431(12) 5044(7) 63(5)

C(32B) -7862(16) 2853(16) 5561(8) 92(7)

C(33B) -7129(16) 3706(14) 5399(8) 76(6)

C(34B) -6494(12) 3626(8) 4850(5) 52(4)

C(1C) -2624(12) 9385(8) -1413(5) 480(50)

C(2C) -2207(12) 10065(8) -1187(5) 360(30)

C(3C) -2929(12) 10649(8) -893(5) 360(30)

C(4C) -4070(12) 10553(8) -824(5) 260(20)

C(5C) -4487(12) 9873(8) -1050(5) 440(50)

C(6C) -3765(12) 9289(8) -1344(5) 310(30)

C(7C) -1892(15) 8846(14) -1752(7) 440(50)

C(8C) 2060(15) 8117(14) 2577(7) 226(19)

C(9C) 1647(15) 7207(14) 2744(7) 235(19)

C(10C) 556(15) 7099(14) 3005(7) 211(17)

C(11C) -121(15) 7901(14) 3099(7) 270(20)

C(12C) 293(15) 8812(14) 2932(7) 270(20)

C(13C) 1383(15) 8919(14) 2671(7) 200(16)

C(14C) 3180(30) 8223(18) 2340(20) 300(30)

C(15C) 0(30) 5070(20) 5269(9) 105(15)a

C(16C) 620(30) 5790(20) 5245(13) 70(10)a

C(17C) 170(20) 5270(20) 5733(10) 139(10)

C(18C) -450(30) 4530(20) 5722(9) 98(14)a

C(19C) -587(18) 4340(15) 5248(9) 91(6)

a occupancy 0.5

Table 3. Bond lengths [Å] and angles [°] for sep2002.

| I-Y | 3.112(2) | C(20B)-C(24B) | 1.51(2) | C(29)-C(30)-C(29A) | 82(2) |
| --- | --- | --- | --- | --- | --- |
| I-Y’ | 3.239(2) | C(21B)-C(23B) | 1.53(2) | O(2)-C(31)-C(32) | 105.1(14) |
| Y-N(2) | 2.216(10) | C(21B)-C(22B) | 1.556(19) | C(31)-C(32)-C(33) | 104.2(15) |
| Y-N(1) | 2.220(10) | C(24B)-C(26B) | 1.54(2) | C(34)-C(33)-C(32) | 104.4(15) |
| Y-O(2) | 2.388(9) | C(24B)-C(25B) | 1.55(2) | O(2)-C(34)-C(33) | 108.9(14) |
| Y-O(1) | 2.391(9) | C(27B)-C(28B) | 1.48(2) | C(29)-C(28)-C(27) | 106(3) |
| O(1)-C(27) | 1.437(17) | C(28B)-C(29B) | 1.53(2) | C(30)-C(29)-C(28) | 102(3) |
| O(1)-C(30) | 1.457(17) | C(29B)-C(30B) | 1.47(2) | C(29A)-C(28A)-C(27) | 102(2) |
| O(2)-C(34) | 1.431(16) | C(31B)-C(32B) | 1.53(3) | C(28A)-C(29A)-C(30) | 110(3) |
| O(2)-C(31) | 1.456(16) | C(32B)-C(33B) | 1.52(3) | Y(1B)-I(1B)-Y(1B)” | 103.33(4) |
| N(1)-C(3) | 1.419(16) | C(33B)-C(34B) | 1.49(2) | N(2B)-Y(1B)-N(1B) | 78.7(4) |
| N(1)-C(1) | 1.475(16) | Y-I-Y’ | 102.69(4) | N(2B)-Y(1B)-O(2B) | 100.4(3) |
| N(2)-C(15) | 1.436(18) | N(2)-Y-N(1) | 79.8(4) | N(1B)-Y(1B)-O(2B) | 97.3(3) |
| N(2)-C(2) | 1.485(18) | N(2)-Y-O(2) | 88.4(4) | N(2B)-Y(1B)-O(1B) | 167.8(3) |
| C(1)-C(2) | 1.49(2) | N(1)-Y-O(2) | 168.2(3) | N(1B)-Y(1B)-O(1B) | 89.3(4) |
| C(3)-C(8) | 1.42(2) | N(2)-Y-O(1) | 96.7(4) | O(2B)-Y(1B)-O(1B) | 78.3(3) |
| C(3)-C(4) | 1.42(2) | N(1)-Y-O(1) | 100.8(4) | N(2B)-Y(1B)-I(1B) | 99.7(2) |
| C(4)-C(5) | 1.42(2) | O(2)-Y-O(1) | 79.6(3) | N(1B)-Y(1B)-I(1B) | 107.5(3) |
| C(4)-C(9) | 1.52(2) | N(2)-Y-I | 108.5(3) | O(2B)-Y(1B)-I(1B) | 150.6(2) |
| C(5)-C(6) | 1.42(2) | N(1)-Y-I | 97.1(3) | O(1B)-Y(1B)-I(1B) | 86.4(2) |
| C(6)-C(7) | 1.29(2) | O(2)-Y-I | 87.3(2) | N(2B)-Y(1B)-I(1B)” | 101.6(3) |
| C(7)-C(8) | 1.38(2) | O(1)-Y-I | 151.3(2) | N(1B)-Y(1B)-I(1B)” | 175.7(3) |
| C(8)-C(12) | 1.50(2) | N(2)-Y-I’ | 173.3(3) | O(2B)-Y(1B)-I(1B)” | 78.4(2) |
| C(9)-C(10) | 1.52(2) | N(1)-Y-I’ | 103.1(3) | O(1B)-Y(1B)-I(1B)” | 90.1(2) |
| C(9)-C(11) | 1.52(2) | O(2)-Y-I’ | 88.5(2) | I(1B)-Y(1B)-I(1B)” | 76.67(4) |
| C(12)-C(14) | 1.50(2) | O(1)-Y-I’ | 76.9(2) | C(30B)-O(1B)-C(27B) | 104.9(11) |
| C(12)-C(13) | 1.55(2) | I-Y-I’ | 77.31(4) | C(30B)-O(1B)-Y(1B) | 131.7(9) |
| C(15)-C(20) | 1.42(2) | C(27)-O(1)-C(30) | 105.9(11) | C(27B)-O(1B)-Y(1B) | 123.2(8) |
| C(15)-C(16) | 1.42(2) | C(27)-O(1)-Y | 124.3(8) | C(31B)-O(2B)-C(34B) | 105.2(10) |
| C(16)-C(17) | 1.36(2) | C(30)-O(1)-Y | 129.3(9) | C(31B)-O(2B)-Y(1B) | 129.9(8) |
| C(16)-C(21) | 1.50(2) | C(34)-O(2)-C(31) | 105.1(11) | C(34B)-O(2B)-Y(1B) | 123.8(7) |
| C(17)-C(18) | 1.39(3) | C(34)-O(2)-Y | 131.7(9) | C(3B)-N(1B)-C(1B) | 110.4(10) |
| C(18)-C(19) | 1.33(3) | C(31)-O(2)-Y | 122.9(9) | C(3B)-N(1B)-Y(1B) | 135.8(8) |
| C(19)-C(20) | 1.38(2) | C(3)-N(1)-C(1) | 112.3(10) | C(1B)-N(1B)-Y(1B) | 113.4(8) |
| C(20)-C(24) | 1.44(3) | C(3)-N(1)-Y | 139.2(8) | C(15B)-N(2B)-C(2B) | 112.7(10) |
| C(21)-C(23) | 1.51(2) | C(1)-N(1)-Y | 108.2(8) | C(15B)-N(2B)-Y(1B) | 137.7(8) |
| C(21)-C(22) | 1.52(2) | C(15)-N(2)-C(2) | 109.4(11) | C(2B)-N(2B)-Y(1B) | 109.2(7) |
| C(24)-C(26) | 1.54(3) | C(15)-N(2)-Y | 138.9(8) | N(1B)-C(1B)-C(2B) | 110.5(11) |
| C(24)-C(25) | 1.57(3) | C(2)-N(2)-Y | 110.5(8) | N(2B)-C(2B)-C(1B) | 112.9(10) |
| C(27)-C(28A) | 1.53(4) | N(1)-C(1)-C(2) | 113.4(12) | N(1B)-C(3B)-C(4B) | 121.5(11) |
| C(27)-C(28) | 1.60(4) | N(2)-C(2)-C(1) | 112.8(12) | N(1B)-C(3B)-C(8B) | 121.8(11) |
| C(30)-C(29) | 1.48(4) | C(8)-C(3)-N(1) | 121.5(13) | C(4B)-C(3B)-C(8B) | 116.7(12) |
| C(30)-C(29A) | 1.51(4) | C(8)-C(3)-C(4) | 119.4(12) | C(5B)-C(4B)-C(3B) | 120.1(12) |
| C(31)-C(32) | 1.46(2) | N(1)-C(3)-C(4) | 119.0(12) | C(5B)-C(4B)-C(9B) | 119.9(12) |
| C(32)-C(33) | 1.52(3) | C(5)-C(4)-C(3) | 119.3(14) | C(3B)-C(4B)-C(9B) | 119.9(12) |
| C(33)-C(34) | 1.47(2) | C(5)-C(4)-C(9) | 117.2(15) | C(4B)-C(5B)-C(6B) | 121.0(13) |
| C(28)-C(29) | 1.55(5) | C(3)-C(4)-C(9) | 123.4(12) | C(7B)-C(6B)-C(5B) | 119.6(13) |
| C(28A)-C(29A) | 1.48(5) | C(4)-C(5)-C(6) | 118.3(17) | C(8B)-C(7B)-C(6B) | 122.0(13) |
| I(1B)-Y(1B) | 3.122(2) | C(7)-C(6)-C(5) | 120.1(16) | C(7B)-C(8B)-C(3B) | 120.5(13) |
| I(1B)-Y(1B)” | 3.232(2) | C(6)-C(7)-C(8) | 125.3(17) | C(7B)-C(8B)-C(12B) | 120.0(13) |
| Y(1B)-N(2B) | 2.198(11) | C(7)-C(8)-C(3) | 117.4(15) | C(3B)-C(8B)-C(12B) | 119.5(13) |
| Y(1B)-N(1B) | 2.212(10) | C(7)-C(8)-C(12) | 120.8(15) | C(10B)-C(9B)-C(4B) | 112.7(12) |
| Y(1B)-O(2B) | 2.394(8) | C(3)-C(8)-C(12) | 121.8(13) | C(10B)-C(9B)-C(11B) | 108.2(12) |
| Y(1B)-O(1B) | 2.417(9) | C(10)-C(9)-C(4) | 114.6(13) | C(4B)-C(9B)-C(11B) | 110.4(12) |
| O(1B)-C(30B) | 1.450(17) | C(10)-C(9)-C(11) | 110.6(15) | C(14B)-C(12B)-C(8B) | 113.7(14) |
| O(1B)-C(27B) | 1.459(16) | C(4)-C(9)-C(11) | 111.7(14) | C(14B)-C(12B)-C(13B) | 108.6(14) |
| O(2B)-C(31B) | 1.451(17) | C(14)-C(12)-C(8) | 114.4(14) | C(8B)-C(12B)-C(13B) | 108.7(13) |
| O(2B)-C(34B) | 1.452(15) | C(14)-C(12)-C(13) | 110.0(14) | C(20B)-C(15B)-N(2B) | 120.7(12) |
| N(1B)-C(3B) | 1.411(16) | C(8)-C(12)-C(13) | 109.4(14) | C(20B)-C(15B)-C(16B) | 118.1(12) |
| N(1B)-C(1B) | 1.469(16) | C(20)-C(15)-C(16) | 119.6(14) | N(2B)-C(15B)-C(16B) | 121.2(12) |
| N(2B)-C(15B) | 1.420(16) | C(20)-C(15)-N(2) | 120.0(14) | C(17B)-C(16B)-C(15B) | 118.4(14) |
| N(2B)-C(2B) | 1.493(15) | C(16)-C(15)-N(2) | 120.4(12) | C(17B)-C(16B)-C(21B) | 121.6(14) |
| C(1B)-C(2B) | 1.511(18) | C(17)-C(16)-C(15) | 117.7(14) | C(15B)-C(16B)-C(21B) | 119.9(12) |
| C(3B)-C(4B) | 1.419(18) | C(17)-C(16)-C(21) | 119.3(15) | C(18B)-C(17B)-C(16B) | 121.8(15) |
| C(3B)-C(8B) | 1.440(18) | C(15)-C(16)-C(21) | 123.0(13) | C(17B)-C(18B)-C(19B) | 123.0(14) |
| C(4B)-C(5B) | 1.381(19) | C(16)-C(17)-C(18) | 124.5(18) | C(18B)-C(19B)-C(20B) | 119.5(14) |
| C(4B)-C(9B) | 1.528(19) | C(19)-C(18)-C(17) | 115.3(17) | C(15B)-C(20B)-C(19B) | 119.2(14) |
| C(5B)-C(6B) | 1.38(2) | C(18)-C(19)-C(20) | 126.6(18) | C(15B)-C(20B)-C(24B) | 122.6(12) |
| C(6B)-C(7B) | 1.36(2) | C(19)-C(20)-C(15) | 116.3(17) | C(19B)-C(20B)-C(24B) | 118.2(13) |
| C(7B)-C(8B) | 1.355(19) | C(19)-C(20)-C(24) | 121.3(16) | C(16B)-C(21B)-C(23B) | 113.7(13) |
| C(8B)-C(12B) | 1.519(19) | C(15)-C(20)-C(24) | 122.4(16) | C(16B)-C(21B)-C(22B) | 109.5(12) |
| C(9B)-C(10B) | 1.53(2) | C(16)-C(21)-C(23) | 112.7(15) | C(23B)-C(21B)-C(22B) | 110.8(12) |
| C(9B)-C(11B) | 1.53(2) | C(16)-C(21)-C(22) | 112.9(14) | C(20B)-C(24B)-C(26B) | 112.2(13) |
| C(12B)-C(14B) | 1.52(2) | C(23)-C(21)-C(22) | 110.5(16) | C(20B)-C(24B)-C(25B) | 112.3(13) |
| C(12B)-C(13B) | 1.54(2) | C(20)-C(24)-C(26) | 116(2) | C(26B)-C(24B)-C(25B) | 108.2(13) |
| C(15B)-C(20B) | 1.410(18) | C(20)-C(24)-C(25) | 112.8(18) | O(1B)-C(27B)-C(28B) | 105.5(12) |
| C(15B)-C(16B) | 1.421(19) | C(26)-C(24)-C(25) | 107.5(18) | C(27B)-C(28B)-C(29B) | 102.2(13) |
| C(16B)-C(17B) | 1.41(2) | O(1)-C(27)-C(28A) | 104.5(16) | C(30B)-C(29B)-C(28B) | 106.4(14) |
| C(16B)-C(21B) | 1.521(19) | O(1)-C(27)-C(28) | 100.8(18) | O(1B)-C(30B)-C(29B) | 107.6(14) |
| C(17B)-C(18B) | 1.29(2) | C(28A)-C(27)-C(28) | 78(2) | O(2B)-C(31B)-C(32B) | 103.2(14) |
| C(18B)-C(19B) | 1.35(2) | O(1)-C(30)-C(29) | 108(2) | C(33B)-C(32B)-C(31B) | 104.3(15) |
| C(19B)-C(20B) | 1.42(2) | O(1)-C(30)-C(29A) | 99.9(17) | C(34B)-C(33B)-C(32B) | 105.4(14) |
|  |  |  |  | O(2B)-C(34B)-C(33B) | 106.3(12) |

Symmetry transformations used to generate equivalent atoms: ‘ -x,-y+1,-z “ -x-1,-y,-z+1

Table 4. Anisotropic displacement parameters (Å2x 103)for sep2002. The anisotropic

displacement factor exponent takes the form: -22[ h2a*2U11 + ... + 2 h k a* b* U12 ]

______________________________________________________________________________

U11 U22 U33 U23 U13 U12

______________________________________________________________________________

I 57(1) 43(1) 43(1) -17(1) -10(1) 9(1)

Y 28(1) 35(1) 38(1) -17(1) -2(1) -3(1)

O(1) 47(6) 39(6) 59(7) -24(5) -14(5) 12(5)

O(2) 38(6) 49(6) 53(6) -24(5) 10(5) -14(5)

N(1) 19(6) 44(7) 37(7) -20(5) -5(5) -1(5)

N(2) 34(7) 44(7) 34(7) -13(5) -1(5) -3(5)

C(1) 42(9) 52(9) 52(10) -25(8) 2(7) -8(7)

C(2) 60(11) 67(11) 54(11) -30(9) -14(8) -5(9)

C(3) 37(9) 46(9) 38(9) -15(7) 7(7) -14(7)

C(4) 31(8) 39(8) 65(11) -31(8) 9(7) -14(7)

C(5) 76(14) 54(11) 74(13) -1(9) 7(10) -15(10)

C(6) 37(10) 120(17) 47(11) -9(11) 9(8) 7(10)

C(7) 34(10) 85(14) 95(16) -40(12) -13(10) 6(9)

C(8) 29(9) 50(9) 63(11) -16(8) 0(7) -8(7)

C(9) 57(11) 41(9) 57(11) -7(8) 16(8) -4(8)

C(10) 106(17) 87(15) 72(14) -18(12) -17(12) 5(12)

C(11) 121(17) 37(10) 83(14) -17(9) -6(12) 13(10)

C(12) 38(9) 68(11) 59(11) -3(9) -4(8) 9(8)

C(13) 59(12) 120(17) 87(15) -18(13) -36(11) -6(12)

C(14) 58(12) 81(14) 106(16) -16(12) -29(11) 11(10)

C(15) 39(9) 59(10) 44(9) -30(8) -6(7) -6(7)

C(16) 42(9) 51(9) 37(9) -16(7) 2(7) -14(7)

C(17) 85(14) 74(13) 46(11) -4(9) 8(10) -16(11)

C(18) 90(16) 121(19) 47(12) -31(13) 20(11) -44(14)

C(19) 57(12) 122(18) 45(12) -45(12) 18(9) 9(12)

C(20) 37(9) 88(13) 59(11) -29(10) -14(8) 21(9)

C(21) 73(12) 67(12) 47(10) -13(9) -3(9) -7(9)

C(22) 83(14) 55(11) 86(14) -14(10) -13(11) 1(10)

C(23) 69(14) 122(19) 160(20) -46(17) -54(15) 28(13)

C(24) 115(18) 110(17) 69(13) -52(13) -17(12) 48(15)

C(25) 140(20) 96(19) 140(20) -13(17) 12(18) 34(17)

C(26) 101(19) 170(30) 190(30) -110(20) -79(19) 97(19)

C(27) 30(8) 49(10) 86(13) -21(9) -8(8) 15(7)

C(30) 42(10) 82(13) 96(15) -42(12) -22(10) 15(9)

C(31) 37(10) 90(14) 84(14) -49(12) 16(9) -3(9)

C(32) 58(12) 128(18) 61(13) -24(13) 24(10) -38(12)

C(33) 70(14) 107(17) 82(15) -6(13) 7(11) -37(12)

C(34) 68(12) 56(11) 94(14) -38(10) 21(10) -36(9)

I(1B) 55(1) 32(1) 44(1) -4(1) 8(1) 4(1)

Y(1B) 26(1) 26(1) 39(1) -7(1) -2(1) -1(1)

O(1B) 40(6) 40(6) 63(7) -6(5) -15(5) -4(5)

O(2B) 38(6) 34(6) 55(6) -3(5) 14(5) 8(4)

N(1B) 24(6) 36(6) 31(6) -8(5) 1(5) 1(5)

N(2B) 41(7) 22(6) 33(6) -4(5) -9(5) 10(5)

C(1B) 35(8) 36(8) 40(9) 1(6) -5(6) -2(6)

C(2B) 32(8) 19(7) 47(9) -1(6) -5(6) 2(6)

C(3B) 41(8) 31(8) 26(8) -2(6) 4(6) -2(6)

C(4B) 38(8) 36(8) 26(8) -2(6) 2(6) -7(6)

C(5B) 36(8) 34(8) 54(10) 9(7) -12(7) -1(6)

C(6B) 63(11) 56(10) 32(9) -7(8) -14(7) -23(8)

C(7B) 76(11) 33(8) 28(8) -6(7) -6(8) 1(8)

C(8B) 49(9) 25(7) 46(10) 0(7) 4(7) -13(6)

C(9B) 37(9) 28(8) 69(11) -5(7) 5(7) 2(6)

C(10B) 49(10) 57(11) 84(13) -20(9) -2(9) 12(8)

C(11B) 67(11) 51(10) 76(12) -26(9) -23(9) -6(8)

C(12B) 73(12) 38(9) 43(9) -7(7) 2(8) 6(8)

C(13B) 63(13) 109(17) 105(17) -21(14) 10(12) 25(12)

C(14B) 113(17) 51(11) 88(15) -22(10) 7(12) -1(11)

C(15B) 34(8) 29(7) 47(9) 0(6) -10(7) -13(6)

C(16B) 52(9) 23(7) 46(9) -13(6) -2(7) -5(6)

C(17B) 79(13) 61(11) 36(9) 4(8) -28(9) -40(10)

C(18B) 58(11) 43(9) 44(10) 14(8) -38(9) -9(8)

C(19B) 32(9) 52(10) 79(13) 1(9) -14(8) 2(7)

C(20B) 24(8) 37(8) 55(10) 2(7) -4(7) -2(6)

C(21B) 61(10) 35(8) 41(9) -16(7) -8(7) -14(7)

C(22B) 103(15) 39(9) 58(11) -21(8) 2(10) -13(9)

C(23B) 89(14) 64(12) 56(11) -20(9) 25(10) -19(10)

C(24B) 33(8) 51(9) 57(10) -5(8) -18(7) 1(7)

C(25B) 47(11) 99(15) 75(13) 9(11) 2(9) -12(10)

C(26B) 60(12) 76(13) 74(13) -15(10) -7(10) 23(10)

C(27B) 34(9) 52(10) 72(12) -1(9) -12(8) 3(7)

C(28B) 41(10) 96(14) 50(11) -4(10) -10(8) -15(9)

C(29B) 63(12) 84(14) 79(14) -27(11) -14(10) -19(10)

C(30B) 73(13) 51(11) 105(16) -4(10) -40(12) -26(9)

C(31B) 27(9) 60(11) 91(14) -4(10) 3(9) 4(8)

C(32B) 69(14) 100(16) 84(15) -16(13) 24(11) 43(13)

C(33B) 67(13) 85(14) 73(13) -32(11) 2(10) 19(11)

C(34B) 71(11) 26(8) 53(10) -13(7) 0(8) 14(7)

Table 5. Hydrogen coordinates ( x 104) and isotropic displacement parameters (Å2x 103)

for sep2002.

________________________________________________________________________________

x y z U(eq)

________________________________________________________________________________

H(1A) 417 8138 844 57

H(1B) 1608 7722 967 57

H(2A) 907 6527 1624 68

H(2B) 141 7445 1728 68

H(5) 3198 8287 -1042 85

H(6) 4764 7354 -751 85

H(7) 4629 6469 71 82

H(9) 420 8041 -341 66

H(10A) 334 8719 -1248 132

H(10B) 932 7682 -1201 132

H(10C) 1645 8603 -1393 132

H(11A) 418 9712 -594 122

H(11B) 1733 9661 -666 122

H(11C) 1027 9342 -81 122

H(12) 2174 5769 985 69

H(13A) 3414 5885 1595 129

H(13B) 2999 6919 1315 129

H(13C) 4203 6500 1110 129

H(14A) 3496 4526 1137 121

H(14B) 4338 5045 639 121

H(14C) 3231 4656 535 121

H(17) -1434 4534 3042 85

H(18) -2766 5594 3410 102

H(19) -3124 7009 2869 89

H(21) 63 4828 1715 75

H(22A) -1314 3709 1958 112

H(22B) -917 3345 2531 112

H(22C) -122 3191 1989 112

H(23A) 1344 3988 2237 167

H(23B) 607 4242 2772 167

H(23C) 1173 5068 2318 167

H(24) -2044 7773 1490 115

H(25A) -2139 9247 1805 196

H(25B) -1108 8585 1985 196

H(25C) -2199 8677 2413 196

H(26A) -3757 8631 1643 213

H(26B) -4017 8007 2237 213

H(26C) -3939 7520 1722 213

H(27A) -997 8546 307 66

H(27B) -2280 8651 563 66

H(30A) -3507 7438 285 83

H(30B) -2808 6703 -55 83

H(31A) -3746 6026 1059 83

H(31B) -2936 6213 1454 83

H(32A) -4381 4991 1805 100

H(32B) -3188 4785 1992 100

H(33A) -3061 3496 1599 106

H(33B) -4033 3913 1257 106

H(34A) -1863 3980 888 86

H(34B) -2831 4451 559 86

H(28A) -2490 9455 -316 125

H(28B) -1374 8959 -584 125

H(29A) -3476 8360 -530 142

H(29B) -2353 7841 -780 142

H(28C) -3148 8855 793 54

H(28D) -3067 9446 183 54

H(29C) -4067 8402 -3 57

H(29D) -4088 7783 594 57

H(1B1) -3718 3723 3356 46

H(1B2) -3004 2736 3433 46

H(2B1) -2734 3408 4136 40

H(2B2) -4003 3747 4258 40

H(5B) -6532 4183 2328 52

H(6B) -6079 3028 1788 59

H(7B) -4923 1732 2050 55

H(8B) -5370 1674 2941 50

H(10D) -7370 5024 3636 97

H(10E) -7576 3944 3628 97

H(10F) -7550 4731 3088 97

H(11D) -5651 5746 3196 91

H(11E) -5741 5465 2632 91

H(11F) -4659 5153 2903 91

H(12B) -3890 1108 3302 64

H(13D) -2280 815 2674 145

H(13E) -2510 1934 2644 145

H(13F) -2831 1441 2188 145

H(14D) -3809 -273 2928 129

H(14E) -4375 304 2434 129

H(14F) -5061 124 3031 129

H(17B) -2313 2275 6119 67

H(18B) -666 1697 5793 57

H(19B) -276 1325 4949 67

H(21B) -4727 2682 5449 52

H(22D) -4772 4226 5683 99

H(22E) -3866 4154 5164 99

H(22F) -3496 4071 5742 99

H(23D) -5305 2766 6370 109

H(23E) -4066 2551 6485 109

H(23F) -4698 1753 6320 109

H(24B) -2240 1447 4033 56

H(25D) -598 1915 3425 118

H(25E) -58 2125 3912 118

H(25F) -1095 2767 3724 118

H(26D) -846 247 3859 108

H(26E) -1506 -44 4457 108

H(26F) -313 374 4367 108

H(27C) -7101 2416 3654 65

H(27D) -8137 1907 4042 65

H(28E) -7061 1471 3037 75

H(28F) -8367 1540 3248 75

H(29E) -8349 36 3734 87

H(29F) -7183 -114 3363 87

H(30C) -7541 -45 4431 88

H(30D) -6388 -268 4071 88

H(31C) -7826 1736 5133 75

H(31D) -8299 2730 4816 75

H(32C) -8636 3057 5676 110

H(32D) -7606 2382 5859 110

H(33C) -7582 4309 5381 91

H(33D) -6622 3682 5662 91

H(34C) -6789 4102 4566 62

H(34D) -5707 3734 4834 62

H(2C) -1436 10131 -1234 428

H(3C) -2647 11109 -740 431

H(4C) -4558 10947 -624 314

H(5C) -5258 9807 -1003 526

H(6C) -4047 8829 -1497 369

H(7C1) -2320 8459 -1908 657

H(7C2) -1395 8431 -1536 657

H(7C3) -1461 9280 -2042 657

H(7C4) -1131 8987 -1749 657

H(7C5) -2056 9016 -2121 657

H(7C6) -1990 8167 -1615 657

H(9C) 2105 6664 2681 282

H(10G) 277 6483 3118 253

H(11G) -858 7829 3275 328

H(12C) -165 9354 2995 327

H(13G) 1663 9535 2558 240

H(14G) 3339 8898 2252 455

H(14H) 3320 7965 2003 455

H(14I) 3660 7878 2587 455

H(14J) 3541 7597 2310 455

H(14K) 3559 8529 2559 455

H(14L) 3219 8616 1974 455

________________________________________________________________________________

## [{Y{ArN(CH2)2NAr}{CH(SiMe3)2}(THF)( C5H12)0.5] 11

Identification code dec602

Empirical formula C37 H65 N2 O Si2 Y . ½(C5 H12)

Formula weight 735.07

Temperature 173(2) K

Wavelength 0.71073 Å

Crystal system Monoclinic

Space group P21/n (No.14)

Unit cell dimensions a = 12.5573(2) Å α = 90°.

b = 17.9434(3) Å β = 99.444(1)°.

c = 19.4501(3) Å γ = 90°.

Volume 4323.1(1) Å3

Z 4

Density (calculated) 1.13 Mg/m3

Absorption coefficient 1.43 mm-1

F(000) 1588

Crystal size 0.10 x 0.10 x 0.05 mm3

Theta range for data collection 3.78 to 25.02°.

Index ranges -14<=h<=14, -21<=k<=20, -23<=l<=21

Reflections collected 44698

Independent reflections 7568 [R(int) = 0.115]

Reflections with I>2sigma(I) 5579

Completeness to theta = 25.02° 99.2 %

Tmax. and Tmin. 0.973 and 0.826

Refinement method Full-matrix least-squares on F2

Data / restraints / parameters 7568 / 7 / 408

Goodness-of-fit on F2 1.061

Final R indices [I>2sigma(I)] R1 = 0.058, wR2 = 0.109

R indices (all data) R1 = 0.092, wR2 = 0.121

Largest diff. peak and hole 0.98 and -0.45 e.Å-3

Data collection KappaCCD , Program package WinGX , Abs correction MULTISCAN

Refinement using SHELXL-97 , Drawing using ORTEP-3 for Windows (20% ellipsoids)

Table 2. Atomic coordinates ( x 104) and equivalent isotropic displacement parameters (Å2x 103)

for dec602. U(eq) is defined as one third of the trace of the orthogonalized Uij tensor.

________________________________________________________________________________

x y z U(eq)

________________________________________________________________________________

Y 286(1) 2287(1) 2281(1) 18(1)

Si(1) -1054(1) 892(1) 1396(1) 28(1)

Si(2) -359(1) 2042(1) 323(1) 33(1)

O 1922(2) 1671(2) 2600(2) 32(1)

N(1) 690(3) 3451(2) 2361(2) 22(1)

N(2) -351(3) 2566(2) 3226(2) 22(1)

C(1) 752(4) 3688(2) 3090(2) 30(1)

C(2) -120(4) 3341(2) 3439(2) 34(1)

C(3) 841(3) 4012(2) 1868(2) 21(1)

C(4) 1840(3) 4070(2) 1626(2) 23(1)

C(5) 1943(4) 4582(2) 1098(2) 30(1)

C(6) 1108(4) 5038(2) 818(2) 34(1)

C(7) 136(3) 4992(2) 1068(2) 30(1)

C(8) -12(3) 4490(2) 1585(2) 26(1)

C(9) 2797(3) 3603(2) 1952(2) 30(1)

C(10) 3495(5) 3321(4) 1442(3) 77(2)

C(11) 3481(5) 4038(4) 2543(3) 70(2)

C(12) -1104(3) 4454(3) 1833(2) 33(1)

C(13) -1313(4) 5137(3) 2246(3) 56(2)

C(14) -2043(4) 4331(4) 1234(3) 61(2)

C(15) -1082(3) 2225(2) 3620(2) 23(1)

C(16) -685(3) 1775(2) 4206(2) 30(1)

C(17) -1403(4) 1437(3) 4575(2) 38(1)

C(18) -2507(4) 1549(3) 4404(2) 38(1)

C(19) -2888(4) 1993(3) 3842(2) 33(1)

C(20) -2206(3) 2334(2) 3442(2) 26(1)

C(21) 530(4) 1674(3) 4445(3) 49(1)

C(22) 905(5) 2042(4) 5152(3) 76(2)

C(23) 854(5) 862(4) 4467(3) 72(2)

C(24) -2685(3) 2807(2) 2819(2) 33(1)

C(25) -3407(4) 2347(3) 2269(3) 52(1)

C(26) -3303(5) 3476(3) 3047(3) 62(2)

C(27) -732(3) 1853(2) 1180(2) 26(1)

C(28) -221(4) 173(3) 1038(2) 40(1)

C(29) -748(4) 766(2) 2378(2) 32(1)

C(30) -2498(4) 635(3) 1110(3) 48(1)

C(31) -400(5) 3062(3) 119(2) 47(1)

C(32) 1038(4) 1714(3) 264(3) 60(2)

C(33) -1291(5) 1596(3) -423(2) 54(2)

C(34) 2691(4) 1830(3) 3229(2) 44(1)

C(35) 3777(4) 1735(3) 3010(3) 44(1)

C(36) 3589(4) 1156(4) 2446(3) 67(2)

C(37) 2444(5) 1178(4) 2173(4) 78(2)

C(38) -6113(15) 755(11) 579(10) 113(6)a

C(39) -5405(15) 568(9) 68(10) 124(7)a

C(40) -5009(10) -212(6) 160(6) 62(3)a

C(41) -4340(15) -395(9) -444(9) 106(6)a

C(42) -4144(15) -1232(10) -452(10) 118(6)a

a occupancy 0.5

Table 3. Bond lengths [Å] and angles [°] for dec602.

_____________________________________________________

| Y-N(1) | 2.149(3) | C(21)-C(22) | 1.528(8) | C(5)-C(4)-C(9) | 120.5(4) |
| --- | --- | --- | --- | --- | --- |
| Y-N(2) | 2.180(3) | C(24)-C(25) | 1.526(7) | C(3)-C(4)-C(9) | 120.3(3) |
| Y-O | 2.327(3) | C(24)-C(26) | 1.534(7) | C(6)-C(5)-C(4) | 121.8(4) |
| Y-C(27) | 2.434(4) | C(34)-C(35) | 1.502(6) | C(5)-C(6)-C(7) | 119.0(4) |
| Y-C(1) | 2.972(4) | C(35)-C(36) | 1.502(7) | C(8)-C(7)-C(6) | 121.5(4) |
| Si(1)-C(27) | 1.835(4) | C(36)-C(37) | 1.449(7) | C(7)-C(8)-C(3) | 119.7(4) |
| Si(1)-C(28) | 1.865(5) |  |  | C(7)-C(8)-C(12) | 119.5(4) |
| Si(1)-C(30) | 1.866(5) | N(1)-Y-N(2) | 80.32(12) | C(3)-C(8)-C(12) | 120.8(4) |
| Si(1)-C(29) | 1.900(4) | N(1)-Y-O | 104.78(11) | C(10)-C(9)-C(4) | 114.5(4) |
| Si(2)-C(27) | 1.837(4) | N(2)-Y-O | 108.31(11) | C(10)-C(9)-C(11) | 110.4(4) |
| Si(2)-C(31) | 1.871(5) | N(1)-Y-C(27) | 117.26(13) | C(4)-C(9)-C(11) | 109.9(4) |
| Si(2)-C(32) | 1.872(5) | N(2)-Y-C(27) | 127.08(13) | C(13)-C(12)-C(8) | 112.1(4) |
| Si(2)-C(33) | 1.886(5) | O-Y-C(27) | 113.29(12) | C(13)-C(12)-C(14) | 110.1(4) |
| O-C(37) | 1.442(6) | C(27)-Si(1)-C(28) | 114.0(2) | C(8)-C(12)-C(14) | 112.5(4) |
| O-C(34) | 1.457(5) | C(27)-Si(1)-C(30) | 113.8(2) | C(20)-C(15)-C(16) | 118.8(4) |
| N(1)-C(3) | 1.422(5) | C(28)-Si(1)-C(30) | 107.2(2) | C(20)-C(15)-N(2) | 121.0(4) |
| N(1)-C(1) | 1.471(5) | C(27)-Si(1)-C(29) | 109.01(18) | C(16)-C(15)-N(2) | 120.2(3) |
| N(2)-C(15) | 1.426(5) | C(28)-Si(1)-C(29) | 105.1(2) | C(17)-C(16)-C(15) | 119.6(4) |
| N(2)-C(2) | 1.467(5) | C(30)-Si(1)-C(29) | 107.2(2) | C(17)-C(16)-C(21) | 119.5(4) |
| C(1)-C(2) | 1.514(6) | C(27)-Si(2)-C(31) | 111.8(2) | C(15)-C(16)-C(21) | 120.9(4) |
| C(3)-C(8) | 1.413(6) | C(27)-Si(2)-C(32) | 112.2(2) | C(16)-C(17)-C(18) | 121.6(4) |
| C(3)-C(4) | 1.414(5) | C(31)-Si(2)-C(32) | 106.7(3) | C(19)-C(18)-C(17) | 118.6(4) |
| C(4)-C(5) | 1.398(6) | C(27)-Si(2)-C(33) | 113.7(2) | C(18)-C(19)-C(20) | 122.3(4) |
| C(4)-C(9) | 1.517(6) | C(31)-Si(2)-C(33) | 105.1(2) | C(19)-C(20)-C(15) | 119.1(4) |
| C(5)-C(6) | 1.370(6) | C(32)-Si(2)-C(33) | 106.8(3) | C(19)-C(20)-C(24) | 119.5(4) |
| C(6)-C(7) | 1.387(6) | C(37)-O-C(34) | 107.6(4) | C(15)-C(20)-C(24) | 121.4(4) |
| C(7)-C(8) | 1.385(6) | C(37)-O-Y | 127.1(3) | C(23)-C(21)-C(22) | 110.5(4) |
| C(8)-C(12) | 1.529(6) | C(34)-O-Y | 124.4(3) | C(23)-C(21)-C(16) | 111.9(5) |
| C(9)-C(10) | 1.515(6) | C(3)-N(1)-C(1) | 116.9(3) | C(22)-C(21)-C(16) | 111.5(4) |
| C(9)-C(11) | 1.530(7) | C(3)-N(1)-Y | 134.0(2) | C(20)-C(24)-C(25) | 111.7(4) |
| C(12)-C(13) | 1.511(6) | C(1)-N(1)-Y | 109.0(2) | C(20)-C(24)-C(26) | 111.1(4) |
| C(12)-C(14) | 1.532(6) | C(15)-N(2)-C(2) | 111.7(3) | C(25)-C(24)-C(26) | 110.8(4) |
| C(15)-C(20) | 1.411(5) | C(15)-N(2)-Y | 135.5(2) | Si(1)-C(27)-Si(2) | 118.6(2) |
| C(15)-C(16) | 1.418(6) | C(2)-N(2)-Y | 111.8(2) | Si(1)-C(27)-Y | 101.75(17) |
| C(16)-C(17) | 1.381(6) | N(1)-C(1)-C(2) | 112.7(3) | Si(2)-C(27)-Y | 124.4(2) |
| C(16)-C(21) | 1.531(6) | N(2)-C(2)-C(1) | 112.9(3) | O-C(34)-C(35) | 104.4(4) |
| C(17)-C(18) | 1.387(6) | C(8)-C(3)-C(4) | 118.8(4) | C(34)-C(35)-C(36) | 104.1(4) |
| C(18)-C(19) | 1.374(6) | C(8)-C(3)-N(1) | 121.1(3) | C(37)-C(36)-C(35) | 106.0(4) |
| C(19)-C(20) | 1.389(6) | C(4)-C(3)-N(1) | 120.1(3) | O-C(37)-C(36) | 108.9(5) |
| C(20)-C(24) | 1.520(6) | C(5)-C(4)-C(3) | 119.2(4) |  |  |
| C(21)-C(23) | 1.511(8) |  |  |  |  |

## [Y3{ArNH(CH2)2NAr}2{ArN(CH2)2NAr}H5(THF)] 14

Identification code apr1203

Empirical formula C87 H141 N6 O Y3

Formula weight 1553.79

Temperature 173(2) K

Wavelength 0.71073 Å

Crystal system Monoclinic

Space group P21/c (No.14)

Unit cell dimensions a = 25.4497(7) Å α = 90°.

b = 14.2389(3) Å β=105.140(1)°.

c = 25.1449(5) Å γ = 90°.

Volume 8795.6(4) Å3

Z 4

Density (calculated) 1.17 Mg/m3

Absorption coefficient 2.01 mm-1

F(000) 3320

Crystal size 0.10 x 0.10 x 0.05 mm3

Theta range for data collection 3.74 to 24.13°.

Index ranges -29<=h<=26, -13<=k<=16, -28<=l<=25

Reflections collected 41296

Independent reflections 13369 [R(int) = 0.186]

Reflections with I>2sigma(I) 7396

Completeness to theta = 24.13° 95.3 %

Tmax. and Tmin. 0.966 and 0.851

Refinement method Full-matrix least-squares on F2

Data / restraints / parameters 13369 / 0 / 902

Goodness-of-fit on F2 1.055

Final R indices [I>2sigma(I)] R1 = 0.084, wR2 = 0.140

R indices (all data) R1 = 0.173, wR2 = 0.172

Largest diff. peak and hole 0.81 and -0.55 e.Å-3

The diffraction was weak , particularly at higher angle.

The hydride H atoms and the two H atoms bonded to nitrogen were refined isotropic; other hydrogens were in riding mode.

Data collection KappaCCD , Program package WinGX , Abs correction MULTISCAN

Refinement using SHELXL-97 , Drawing using ORTEP-3 for Windows (20% ellipsoids)

Table 2. Atomic coordinates ( x 104) and equivalent isotropic displacement parameters (Å2x 103)

for apr1203. U(eq) is defined as one third of the trace of the orthogonalized Uij tensor.

________________________________________________________________________________

x y z U(eq)

________________________________________________________________________________

Y(1) 2502(1) 5491(1) 3240(1) 28(1)

Y(2) 3046(1) 3338(1) 3767(1) 26(1)

Y(3) 1815(1) 4085(1) 3968(1) 30(1)

O 2742(2) 2015(4) 3194(2) 36(2)

N(1) 2202(3) 6162(5) 2437(3) 33(2)

N(2) 2964(3) 6802(5) 3413(3) 34(2)

N(3) 3943(3) 2648(5) 3632(3) 34(2)

N(4) 3705(3) 3287(5) 4543(2) 27(2)

N(5) 1043(3) 3370(5) 3589(3) 35(2)

N(6) 1051(3) 4959(6) 4295(3) 38(2)

C(1) 2580(5) 6928(8) 2414(4) 75(4)

C(2) 2887(6) 7319(10) 2896(4) 122(7)

C(3) 1734(4) 6153(6) 1976(3) 35(2)

C(4) 1239(4) 6509(7) 2034(4) 42(2)

C(5) 777(4) 6440(7) 1578(4) 56(3)

C(6) 808(4) 6063(8) 1083(4) 57(3)

C(7) 1302(4) 5744(7) 1035(4) 48(3)

C(8) 1776(4) 5764(6) 1469(4) 42(2)

C(9) 1187(4) 6968(7) 2555(4) 44(3)

C(10) 737(4) 6563(8) 2781(4) 69(3)

C(11) 1111(5) 8043(7) 2469(4) 69(3)

C(12) 2300(4) 5355(8) 1386(3) 48(3)

C(13) 2470(5) 5864(8) 929(4) 73(3)

C(14) 2248(5) 4311(8) 1277(5) 72(3)

C(15) 3268(4) 7309(6) 3881(3) 36(2)

C(16) 2998(5) 7787(6) 4226(4) 48(3)

C(17) 3307(5) 8260(7) 4689(4) 64(3)

C(18) 3864(5) 8251(7) 4820(5) 67(3)

C(19) 4141(5) 7799(7) 4485(4) 57(3)

C(20) 3833(4) 7327(6) 4003(4) 39(2)

C(21) 2378(5) 7771(8) 4103(4) 63(3)

C(22) 2131(6) 8714(10) 3998(8) 158(8)

C(23) 2185(6) 7252(13) 4547(7) 138(7)

C(24) 4145(4) 6795(7) 3660(4) 54(3)

C(25) 4622(7) 7326(11) 3565(9) 165(9)

C(26) 4327(7) 5878(8) 3901(5) 119(6)

C(27) 4369(3) 3226(6) 4009(3) 37(2)

C(28) 4279(3) 3170(7) 4573(3) 39(2)

C(29) 4102(3) 2209(6) 3178(3) 31(2)

C(30) 4187(3) 2744(6) 2745(3) 31(2)

C(31) 4345(3) 2263(7) 2331(3) 39(2)

C(32) 4412(4) 1311(8) 2336(4) 51(3)

C(33) 4316(4) 801(7) 2760(4) 53(3)

C(34) 4159(4) 1223(7) 3191(4) 44(2)

C(35) 4096(4) 3796(6) 2700(3) 40(2)

C(36) 4635(4) 4323(7) 2747(4) 60(3)

C(37) 3675(4) 4084(7) 2178(4) 53(3)

C(38) 4070(5) 611(7) 3656(5) 71(4)

C(39) 3770(6) -290(10) 3472(6) 127(6)

C(40) 4583(6) 422(10) 4086(5) 107(5)

C(41) 3615(3) 3302(6) 5083(3) 34(2)

C(42) 3486(4) 2467(6) 5317(3) 38(2)

C(43) 3375(4) 2491(7) 5838(4) 48(3)

C(44) 3417(4) 3319(8) 6129(4) 50(3)

C(45) 3569(4) 4124(7) 5912(4) 46(3)

C(47) 3481(4) 1525(7) 5041(4) 55(3)

C(48) 2915(5) 1048(7) 4910(4) 76(4)

C(49) 3916(5) 859(8) 5384(5) 84(4)

C(50) 3825(4) 5052(6) 5167(4) 43(2)

C(51) 3389(4) 5787(7) 5102(4) 50(3)

C(52) 4370(4) 5453(8) 5521(5) 73(3)

C(92) 3676(3) 4141(6) 5393(3) 37(2)

C(53) 529(4) 3871(8) 3566(4) 56(3)

C(54) 552(4) 4358(8) 4097(4) 57(3)

C(55) 953(3) 2563(7) 3248(4) 38(2)

C(56) 983(4) 1671(7) 3493(4) 46(2)

C(57) 891(4) 883(8) 3148(5) 59(3)

C(58) 774(4) 942(8) 2584(5) 60(3)

C(59) 753(4) 1812(8) 2359(4) 53(3)

C(60) 845(3) 2628(6) 2670(4) 40(2)

C(61) 1119(4) 1554(8) 4111(4) 57(3)

C(62) 640(5) 1665(13) 4341(5) 121(6)

C(63) 1450(6) 728(11) 4352(5) 117(6)

C(64) 824(4) 3581(7) 2382(4) 46(3)

C(65) 250(4) 3848(8) 2060(4) 62(3)

C(66) 1208(4) 3621(7) 2000(4) 60(3)

C(67) 1071(4) 5303(7) 4849(3) 38(2)

C(68) 1357(4) 4732(7) 5285(3) 44(2)

C(69) 1369(5) 5013(9) 5816(4) 72(3)

C(70) 1122(5) 5843(10) 5917(5) 90(4)

C(71) 847(5) 6387(9) 5484(5) 81(4)

C(72) 813(4) 6123(7) 4933(4) 50(3)

C(73) 1681(4) 3895(7) 5186(4) 43(2)

C(74) 2230(4) 4223(7) 5131(4) 48(3)

C(75) 1759(5) 3121(8) 5617(4) 73(4)

C(76) 479(4) 6743(8) 4475(4) 58(3)

C(77) -118(4) 6712(9) 4468(5) 81(4)

C(78) 670(6) 7762(9) 4526(6) 107(5)

C(79) 2368(4) 1282(7) 3282(4) 61(3)

C(80) 2262(4) 672(7) 2770(4) 64(3)

C(81) 2277(5) 1395(9) 2326(5) 78(4)

C(82) 2713(4) 2090(8) 2612(4) 59(3)

C(83) 4162(8) 6405(18) 1480(8) 163(8)

C(84) 4175(7) 7319(15) 1700(10) 156(9)

C(85) 3617(9) 7832(15) 1626(7) 129(7)

C(86) 3657(11) 8633(16) 1874(9) 174(10)

C(87) 3063(8) 9156(13) 1784(7) 155(8)

Table 3. Bond lengths [Å] and angles [°] for apr1203.

| Y(1)-N(1) | 2.184(7) | C(72)-C(76) | 1.524(13) | C(4)-C(9)-C(11) | 110.1(8) |
| --- | --- | --- | --- | --- | --- |
| Y(1)-N(2) | 2.189(7) | C(73)-C(74) | 1.514(12) | C(10)-C(9)-C(11) | 110.5(8) |
| Y(1)-H(1X) | 2.18(6) | C(73)-C(75) | 1.521(12) | C(14)-C(12)-C(13) | 111.2(8) |
| Y(1)-H(3X) | 2.15(7) | C(76)-C(77) | 1.515(14) | C(14)-C(12)-C(8) | 111.4(8) |
| Y(1)-H(4X) | 2.30(8) | C(76)-C(78) | 1.525(16) | C(13)-C(12)-C(8) | 110.8(8) |
| Y(1)-H(5X) | 2.13(10) | C(79)-C(80) | 1.518(13) | C(20)-C(15)-C(16) | 119.8(8) |
| Y(2)-N(4) | 2.218(6) | C(80)-C(81) | 1.526(14) | C(20)-C(15)-N(2) | 120.0(8) |
| Y(2)-O | 2.375(5) | C(81)-C(82) | 1.521(13) | C(16)-C(15)-N(2) | 120.3(8) |
| Y(2)…N(3) | 2.589(7) | C(83)-C(84) | 1.41(2) | C(17)-C(16)-C(15) | 119.1(10) |
| Y(2)-H(2X) | 2.14(5) | C(84)-C(85) | 1.56(2) | C(17)-C(16)-C(21) | 120.2(10) |
| Y(2)-H(3X) | 1.98(6) | C(85)-C(86) | 1.29(2) | C(15)-C(16)-C(21) | 120.7(8) |
| Y(2)-H(4X) | 2.39(8) | C(86)-C(87) | 1.65(3) | C(18)-C(17)-C(16) | 121.2(11) |
| Y(2)-H(5X) | 1.94(10) |  |  | C(17)-C(18)-C(19) | 121.1(10) |
| Y(3)-N(5) | 2.196(7) | N(1)-Y(1)-N(2) | 81.4(2) | C(18)-C(19)-C(20) | 118.7(10) |
| Y(3)…N(6) | 2.615(7) | N(1)-Y(1)-H(1X) | 109.2(15) | C(15)-C(20)-C(19) | 120.2(9) |
| Y(3)-H(1X) | 1.98(6) | N(2)-Y(1)-H(1X) | 116.1(15) | C(15)-C(20)-C(24) | 122.0(8) |
| Y(3)-H(2X) | 2.06(5) | N(1)-Y(1)-H(3X) | 116.0(17) | C(19)-C(20)-C(24) | 117.7(9) |
| Y(3)-H(4X) | 2.07(7) | N(2)-Y(1)-H(3X) | 104.4(18) | C(22)-C(21)-C(23) | 111.6(12) |
| Y(3)-H(5X) | 2.38(10) | H(1X)-Y(1)-H(3X) | 122(2) | C(22)-C(21)-C(16) | 113.0(11) |
| O-C(82) | 1.448(10) | N(1)-Y(1)-H(4X) | 116.2(18) | C(23)-C(21)-C(16) | 111.9(10) |
| O-C(79) | 1.468(10) | N(2)-Y(1)-H(4X) | 162.3(18) | C(26)-C(24)-C(25) | 109.5(12) |
| N(1)-C(3) | 1.429(10) | H(1X)-Y(1)-H(4X) | 62(2) | C(26)-C(24)-C(20) | 111.5(9) |
| N(1)-C(1) | 1.466(11) | H(3X)-Y(1)-H(4X) | 67(3) | C(25)-C(24)-C(20) | 113.8(10) |
| N(2)-C(15) | 1.424(10) | N(1)-Y(1)-H(5X) | 164(3) | N(3)-C(27)-C(28) | 108.0(7) |
| N(2)-C(2) | 1.463(11) | N(2)-Y(1)-H(5X) | 114(3) | N(4)-C(28)-C(27) | 110.1(7) |
| N(3)-C(29) | 1.449(10) | H(1X)-Y(1)-H(5X) | 69(3) | C(30)-C(29)-C(34) | 121.8(8) |
| N(3)-C(27) | 1.487(10) | H(3X)-Y(1)-H(5X) | 58(3) | C(30)-C(29)-N(3) | 120.8(8) |
| N(3)-H(3N) | 0.89(7) | H(4X)-Y(1)-H(5X) | 49(3) | C(34)-C(29)-N(3) | 117.3(8) |
| N(4)-C(41) | 1.437(10) | N(4)-Y(2)-O | 124.0(2) | C(31)-C(30)-C(29) | 116.7(8) |
| N(4)-C(28) | 1.453(10) | N(4)-Y(2)-N(3) | 67.1(2) | C(31)-C(30)-C(35) | 120.0(8) |
| N(5)-C(55) | 1.416(11) | O-Y(2)-N(3) | 77.1(2) | C(29)-C(30)-C(35) | 123.3(8) |
| N(5)-C(53) | 1.478(11) | N(4)-Y(2)-H(2X) | 96.1(14) | C(32)-C(31)-C(30) | 122.8(9) |
| N(6)-C(67) | 1.465(10) | O-Y(2)-H(2X) | 86.5(14) | C(33)-C(32)-C(31) | 119.2(9) |
| N(6)-C(54) | 1.505(11) | N(3)-Y(2)-H(2X) | 142.1(14) | C(32)-C(33)-C(34) | 121.9(9) |
| N(6)-H(6N) | 0.90(8) | N(4)-Y(2)-H(3X) | 112.9(19) | C(33)-C(34)-C(29) | 117.5(9) |
| C(1)-C(2) | 1.376(13) | O-Y(2)-H(3X) | 108.6(18) | C(33)-C(34)-C(38) | 119.0(9) |
| C(3)-C(4) | 1.399(12) | N(3)-Y(2)-H(3X) | 90.0(19) | C(29)-C(34)-C(38) | 123.5(9) |
| C(3)-C(8) | 1.419(11) | H(2X)-Y(2)-H(3X) | 128(2) | C(30)-C(35)-C(37) | 113.0(7) |
| C(4)-C(5) | 1.416(12) | N(4)-Y(2)-H(4X) | 144.8(18) | C(30)-C(35)-C(36) | 111.2(8) |
| C(4)-C(9) | 1.502(12) | O-Y(2)-H(4X) | 85.3(18) | C(37)-C(35)-C(36) | 110.4(8) |
| C(5)-C(6) | 1.377(12) | N(3)-Y(2)-H(4X) | 145.8(18) | C(40)-C(38)-C(39) | 110.3(10) |
| C(6)-C(7) | 1.369(13) | H(2X)-Y(2)-H(4X) | 64(2) | C(40)-C(38)-C(34) | 112.5(10) |
| C(7)-C(8) | 1.400(12) | H(3X)-Y(2)-H(4X) | 68(3) | C(39)-C(38)-C(34) | 114.8(10) |
| C(8)-C(12) | 1.517(12) | N(4)-Y(2)-H(5X) | 99(3) | C(42)-C(41)-C(92) | 119.4(8) |
| C(9)-C(10) | 1.517(13) | O-Y(2)-H(5X) | 134(3) | C(42)-C(41)-N(4) | 119.8(7) |
| C(9)-C(11) | 1.551(13) | N(3)-Y(2)-H(5X) | 143(3) | C(92)-C(41)-N(4) | 120.8(8) |
| C(12)-C(14) | 1.511(14) | H(2X)-Y(2)-H(5X) | 70(3) | C(41)-C(42)-C(43) | 119.6(8) |
| C(12)-C(13) | 1.515(13) | H(3X)-Y(2)-H(5X) | 63(3) | C(41)-C(42)-C(47) | 122.4(8) |
| C(15)-C(20) | 1.389(12) | H(4X)-Y(2)-H(5X) | 49(3) | C(43)-C(42)-C(47) | 118.0(8) |
| C(15)-C(16) | 1.413(13) | N(5)-Y(3)-N(6) | 72.8(3) | C(44)-C(43)-C(42) | 120.5(9) |
| C(16)-C(17) | 1.397(13) | N(5)-Y(3)-H(1X) | 110.3(17) | C(45)-C(44)-C(43) | 119.8(9) |
| C(16)-C(21) | 1.527(14) | N(6)-Y(3)-H(1X) | 79.2(17) | C(44)-C(45)-C(92) | 122.0(9) |
| C(17)-C(18) | 1.368(15) | N(5)-Y(3)-H(2X) | 105.4(15) | C(42)-C(47)-C(49) | 111.8(8) |
| C(18)-C(19) | 1.389(15) | N(6)-Y(3)-H(2X) | 146.2(15) | C(42)-C(47)-C(48) | 112.6(9) |
| C(19)-C(20) | 1.428(12) | H(1X)-Y(3)-H(2X) | 130(2) | C(49)-C(47)-C(48) | 110.0(9) |
| C(20)-C(24) | 1.518(13) | N(5)-Y(3)-H(4X) | 100(2) | C(51)-C(50)-C(92) | 112.9(7) |
| C(21)-C(22) | 1.477(16) | N(6)-Y(3)-H(4X) | 143(2) | C(51)-C(50)-C(52) | 109.2(8) |
| C(21)-C(23) | 1.523(16) | H(1X)-Y(3)-H(4X) | 69(3) | C(92)-C(50)-C(52) | 112.2(8) |
| C(24)-C(26) | 1.464(14) | H(2X)-Y(3)-H(4X) | 71(3) | C(45)-C(92)-C(41) | 118.6(8) |
| C(24)-C(25) | 1.501(15) | N(5)-Y(3)-H(5X) | 147(2) | C(45)-C(92)-C(50) | 119.8(8) |
| C(27)-C(28) | 1.497(11) | N(6)-Y(3)-H(5X) | 134(2) | C(41)-C(92)-C(50) | 121.6(7) |
| C(29)-C(30) | 1.391(11) | H(1X)-Y(3)-H(5X) | 67(3) | N(5)-C(53)-C(54) | 111.3(7) |
| C(29)-C(34) | 1.411(12) | H(2X)-Y(3)-H(5X) | 64(3) | C(53)-C(54)-N(6) | 113.2(7) |
| C(30)-C(31) | 1.391(12) | H(4X)-Y(3)-H(5X) | 48(3) | C(56)-C(55)-C(60) | 119.1(9) |
| C(30)-C(35) | 1.515(12) | C(82)-O-C(79) | 109.9(7) | C(56)-C(55)-N(5) | 119.0(8) |
| C(31)-C(32) | 1.366(13) | C(82)-O-Y(2) | 118.5(5) | C(60)-C(55)-N(5) | 121.9(8) |
| C(32)-C(33) | 1.364(13) | C(79)-O-Y(2) | 126.4(5) | C(57)-C(56)-C(55) | 118.1(9) |
| C(33)-C(34) | 1.385(13) | C(3)-N(1)-C(1) | 113.1(7) | C(57)-C(56)-C(61) | 120.4(9) |
| C(34)-C(38) | 1.521(13) | C(3)-N(1)-Y(1) | 139.7(5) | C(55)-C(56)-C(61) | 121.6(9) |
| C(35)-C(37) | 1.519(11) | C(1)-N(1)-Y(1) | 106.7(5) | C(58)-C(57)-C(56) | 123.2(10) |
| C(35)-C(36) | 1.540(12) | C(15)-N(2)-C(2) | 113.4(7) | C(59)-C(58)-C(57) | 117.4(10) |
| C(38)-C(40) | 1.487(15) | C(15)-N(2)-Y(1) | 138.1(5) | C(58)-C(59)-C(60) | 123.3(10) |
| C(38)-C(39) | 1.502(16) | C(2)-N(2)-Y(1) | 108.2(6) | C(59)-C(60)-C(55) | 119.0(9) |
| C(41)-C(42) | 1.403(11) | C(29)-N(3)-C(27) | 115.7(7) | C(59)-C(60)-C(64) | 119.8(9) |
| C(41)-C(92) | 1.412(11) | C(29)-N(3)-Y(2) | 134.8(5) | C(55)-C(60)-C(64) | 121.3(8) |
| C(42)-C(43) | 1.410(12) | C(27)-N(3)-Y(2) | 103.1(5) | C(63)-C(61)-C(62) | 111.3(11) |
| C(42)-C(47) | 1.508(12) | C(29)-N(3)-H(3N) | 105(5) | C(63)-C(61)-C(56) | 117.4(10) |
| C(43)-C(44) | 1.378(13) | C(27)-N(3)-H(3N) | 94(5) | C(62)-C(61)-C(56) | 113.4(9) |
| C(44)-C(45) | 1.368(12) | Y(2)-N(3)-H(3N) | 94(5) | C(65)-C(64)-C(60) | 112.5(8) |
| C(45)-C(92) | 1.401(12) | C(41)-N(4)-C(28) | 110.9(6) | C(65)-C(64)-C(66) | 109.7(8) |
| C(47)-C(49) | 1.540(13) | C(41)-N(4)-Y(2) | 124.2(5) | C(60)-C(64)-C(66) | 112.2(8) |
| C(47)-C(48) | 1.549(14) | C(28)-N(4)-Y(2) | 124.8(5) | C(72)-C(67)-C(68) | 122.6(8) |
| C(50)-C(51) | 1.502(12) | C(55)-N(5)-C(53) | 111.5(7) | C(72)-C(67)-N(6) | 121.9(8) |
| C(50)-C(92) | 1.504(12) | C(55)-N(5)-Y(3) | 128.5(5) | C(68)-C(67)-N(6) | 115.4(8) |
| C(50)-C(52) | 1.548(12) | C(53)-N(5)-Y(3) | 118.4(6) | C(69)-C(68)-C(67) | 117.4(9) |
| C(53)-C(54) | 1.492(12) | C(67)-N(6)-C(54) | 108.8(7) | C(69)-C(68)-C(73) | 120.9(9) |
| C(55)-C(56) | 1.405(12) | C(67)-N(6)-Y(3) | 128.0(5) | C(67)-C(68)-C(73) | 121.5(8) |
| C(55)-C(60) | 1.410(12) | C(54)-N(6)-Y(3) | 104.9(5) | C(68)-C(69)-C(70) | 121.5(10) |
| C(56)-C(57) | 1.402(14) | C(67)-N(6)-H(6N) | 111(6) | C(71)-C(70)-C(69) | 119.7(10) |
| C(56)-C(61) | 1.511(13) | C(54)-N(6)-H(6N) | 96(6) | C(70)-C(71)-C(72) | 120.9(11) |
| C(57)-C(58) | 1.371(13) | Y(3)-N(6)-H(6N) | 104(6) | C(67)-C(72)-C(71) | 117.7(9) |
| C(58)-C(59) | 1.358(13) | C(2)-C(1)-N(1) | 119.7(9) | C(67)-C(72)-C(76) | 124.6(8) |
| C(59)-C(60) | 1.385(12) | C(1)-C(2)-N(2) | 119.5(9) | C(71)-C(72)-C(76) | 117.7(9) |
| C(60)-C(64) | 1.532(12) | C(4)-C(3)-C(8) | 121.1(8) | C(68)-C(73)-C(74) | 109.2(8) |
| C(61)-C(63) | 1.481(15) | C(4)-C(3)-N(1) | 119.6(7) | C(68)-C(73)-C(75) | 115.4(8) |
| C(61)-C(62) | 1.488(15) | C(8)-C(3)-N(1) | 119.3(8) | C(74)-C(73)-C(75) | 109.7(8) |
| C(64)-C(65) | 1.522(12) | C(3)-C(4)-C(5) | 118.0(8) | C(77)-C(76)-C(72) | 110.6(9) |
| C(64)-C(66) | 1.539(13) | C(3)-C(4)-C(9) | 122.5(8) | C(77)-C(76)-C(78) | 109.0(10) |
| C(67)-C(72) | 1.381(12) | C(5)-C(4)-C(9) | 119.5(8) | C(72)-C(76)-C(78) | 112.7(10) |
| C(67)-C(68) | 1.407(12) | C(6)-C(5)-C(4) | 121.8(9) | O-C(79)-C(80) | 104.9(8) |
| C(68)-C(69) | 1.386(13) | C(7)-C(6)-C(5) | 118.6(9) | C(79)-C(80)-C(81) | 101.6(8) |
| C(68)-C(73) | 1.507(12) | C(6)-C(7)-C(8) | 123.3(9) | C(82)-C(81)-C(80) | 104.3(8) |
| C(69)-C(70) | 1.393(15) | C(7)-C(8)-C(3) | 117.0(8) | O-C(82)-C(81) | 105.6(8) |
| C(70)-C(71) | 1.370(15) | C(7)-C(8)-C(12) | 119.7(8) | C(83)-C(84)-C(85) | 117.1(17) |
| C(71)-C(72) | 1.417(13) | C(3)-C(8)-C(12) | 123.2(8) | C(86)-C(85)-C(84) | 114(2) |
|  |  | C(4)-C(9)-C(10) | 114.1(8) | C(85)-C(86)-C(87) | 112(2) |

Least-squares planes (x,y,z in crystal coordinates) and deviations from them

(* indicates atom used to define plane)

6.9470 (0.0079) x + 6.3743 (0.0040) y + 18.8755 (0.0054) z = 11.3536 (0.0007)

* 0.0000 (0.0000) Y1

* 0.0000 (0.0000) Y2

* 0.0000 (0.0000) Y3

-1.2966 (0.0066) N1 1.4839 (0.0067) N2

-0.0702 (0.0071) N3 1.8897 (0.0062) N4

-1.7070 (0.0067) N5 0.6453 (0.0075) N6

0.1613 (0.0556) H1X 0.0514 (0.0514) H2X

-0.1553 (0.0630) H3X -1.0118 (0.0735) H4X

0.7544 (0.0989) H5X

Rms deviation of fitted atoms = 0.0000

## [{Y{ArN(CH2)2NAr}(OAr*)(THF)] (OAr* = OC6H2-2,6-tBu-4-Me) 15

Identification code mar2103

Empirical formula C45 H69 N2 O2 Y

Formula weight 758.93

Temperature 173(2) K

Wavelength 0.71073 Å

Crystal system Monoclinic

Space group P21/n (No.14)

Unit cell dimensions a = 10.2131(3) Å α = 90°.

b = 23.5543(6) Å β = 101.190(1)°.

c = 18.5374(7) Å γ = 90°.

Volume 4374.6(2) Å3

Z 4

Density (calculated) 1.15 Mg/m3

Absorption coefficient 1.37 mm-1

F(000) 1632

Crystal size 0.20 x 0.15 x 0.02 mm3

Theta range for data collection 3.76 to 22.98°.

Index ranges -10<=h<=11, -25<=k<=23, -17<=l<=18

Reflections collected 19710

Independent reflections 5660 [R(int) = 0.100]

Reflections with I>2sigma(I) 3978

Completeness to theta = 22.98° 93.1 %

Tmax. and Tmin. 0.955 and 0.809

Refinement method Full-matrix least-squares on F2

Data / restraints / parameters 5660 / 0 / 451

Goodness-of-fit on F2 1.044

Final R indices [I>2sigma(I)] R1 = 0.061, wR2 = 0.122

R indices (all data) R1 = 0.102, wR2 = 0.142

Largest diff. peak and hole 0.69 and -0.31 e.Å-3

Data collection KappaCCD , Program package WinGX , Abs correction MULTISCAN

Refinement using SHELXL-97 , Drawing using ORTEP-3 for Windows(20% ellipsoids)

Table 2. Atomic coordinates ( x 104) and equivalent isotropic displacement parameters (Å2x 103)

for mar2103. U(eq) is defined as one third of the trace of the orthogonalized Uij tensor.

________________________________________________________________________________

x y z U(eq)

________________________________________________________________________________

Y 1328(1) 1642(1) 2355(1) 33(1)

O(1) 817(4) 1197(1) 3220(2) 42(1)

O(2) -740(4) 1658(2) 1572(2) 52(1)

N(1) 2149(4) 2496(2) 2390(3) 36(1)

N(2) 2909(4) 1468(2) 1757(2) 30(1)

C(1) 2618(6) 2510(2) 1687(3) 46(2)

C(2) 3496(6) 2014(2) 1591(4) 45(2)

C(3) 2206(6) 3020(2) 2783(4) 41(2)

C(4) 3332(6) 3143(2) 3327(4) 44(2)

C(5) 3337(7) 3652(3) 3719(4) 58(2)

C(6) 2282(8) 4026(3) 3580(4) 64(2)

C(7) 1227(8) 3906(3) 3043(5) 68(2)

C(8) 1150(6) 3409(2) 2623(4) 53(2)

C(9) 4535(6) 2763(3) 3467(4) 49(2)

C(10) 5114(8) 2659(3) 4279(4) 71(2)

C(11) 5628(7) 2994(3) 3082(4) 66(2)

C(12) -30(6) 3313(3) 2007(5) 69(2)

C(13) 59(9) 3689(4) 1340(6) 114(4)

C(14) -1370(8) 3392(4) 2248(7) 126(4)

C(15) 3756(5) 1007(2) 1676(3) 32(1)

C(16) 4692(5) 804(2) 2294(3) 34(1)

C(17) 5546(5) 364(2) 2194(4) 44(2)

C(18) 5484(6) 119(2) 1513(4) 45(2)

C(19) 4565(6) 306(2) 925(4) 48(2)

C(20) 3698(5) 750(2) 983(3) 39(1)

C(21) 4809(6) 1053(2) 3052(3) 44(2)

C(22) 4599(7) 613(3) 3632(4) 74(2)

C(23) 6145(6) 1349(3) 3299(4) 53(2)

C(24) 2719(6) 951(3) 310(3) 50(2)

C(25) 3439(8) 1171(3) -290(4) 74(2)

C(26) 1729(7) 478(3) 10(4) 77(2)

C(27) 89(5) 882(2) 3611(3) 31(1)

C(28) -274(5) 318(2) 3398(3) 32(1)

C(29) -1070(5) 32(2) 3812(3) 37(1)

C(30) -1483(5) 261(2) 4412(3) 41(2)

C(31) -1071(5) 814(2) 4617(3) 41(1)

C(32) -278(5) 1133(2) 4227(3) 35(1)

C(33) 180(6) -16(2) 2773(3) 40(2)

C(34) 947(8) 305(3) 2269(4) 77(2)

C(35) 1162(8) -487(3) 3128(5) 82(2)

C(36) -976(8) -295(4) 2286(5) 91(3)

C(37) -2327(6) -69(3) 4851(4) 53(2)

C(38) 161(6) 1738(2) 4485(4) 45(2)

C(39) 1694(6) 1771(3) 4671(4) 67(2)

C(40) -395(7) 2178(2) 3900(4) 60(2)

C(41) -344(8) 1910(3) 5185(4) 76(2)

C(42) -1055(8) 1624(5) 792(5) 115(4)

C(43) -2440(9) 1422(5) 606(5) 116(4)

C(44) -3055(7) 1609(4) 1197(4) 77(2)

C(45) -1962(6) 1617(3) 1864(4) 69(2)

________________________________________________________________________________

Table 3. Bond lengths [Å] and angles [°] for mar2103.

| Y-O(1) | 2.066(4) | C(33)-C(35) | 1.554(9) | C(17)-C(16)-C(21) | 118.4(5) |
| --- | --- | --- | --- | --- | --- |
| Y-N(2) | 2.168(4) | C(38)-C(40) | 1.529(9) | C(15)-C(16)-C(21) | 122.7(5) |
| Y-N(1) | 2.173(4) | C(38)-C(39) | 1.539(8) | C(18)-C(17)-C(16) | 121.0(5) |
| Y-O(2) | 2.319(4) | C(38)-C(41) | 1.540(9) | C(19)-C(18)-C(17) | 119.9(5) |
| O(1)-C(27) | 1.356(6) | C(42)-C(43) | 1.469(11) | C(18)-C(19)-C(20) | 122.1(6) |
| O(2)-C(42) | 1.421(9) | C(43)-C(44) | 1.435(11) | C(19)-C(20)-C(15) | 118.6(5) |
| O(2)-C(45) | 1.457(7) | C(44)-C(45) | 1.496(10) | C(19)-C(20)-C(24) | 120.0(5) |
| N(1)-C(3) | 1.428(7) | O(1)-Y-N(2) | 128.75(14) | C(15)-C(20)-C(24) | 121.4(5) |
| N(1)-C(1) | 1.475(7) | O(1)-Y-N(1) | 126.86(16) | C(16)-C(21)-C(23) | 111.3(5) |
| N(2)-C(15) | 1.414(6) | N(2)-Y-N(1) | 82.53(15) | C(16)-C(21)-C(22) | 113.3(5) |
| N(2)-C(2) | 1.477(6) | O(1)-Y-O(2) | 98.99(15) | C(23)-C(21)-C(22) | 109.7(5) |
| C(1)-C(2) | 1.506(7) | N(2)-Y-O(2) | 111.21(15) | C(20)-C(24)-C(26) | 110.8(5) |
| C(3)-C(8) | 1.403(8) | N(1)-Y-O(2) | 107.70(16) | C(20)-C(24)-C(25) | 111.6(5) |
| C(3)-C(4) | 1.405(9) | C(27)-O(1)-Y | 160.1(4) | C(26)-C(24)-C(25) | 111.0(6) |
| C(4)-C(5) | 1.400(8) | C(42)-O(2)-C(45) | 109.4(5) | O(1)-C(27)-C(32) | 117.8(5) |
| C(4)-C(9) | 1.502(8) | C(42)-O(2)-Y | 129.4(4) | O(1)-C(27)-C(28) | 120.4(5) |
| C(5)-C(6) | 1.377(9) | C(45)-O(2)-Y | 120.6(4) | C(32)-C(27)-C(28) | 121.8(5) |
| C(6)-C(7) | 1.347(10) | C(3)-N(1)-C(1) | 116.2(4) | C(29)-C(28)-C(27) | 116.8(5) |
| C(7)-C(8) | 1.400(9) | C(3)-N(1)-Y | 142.4(4) | C(29)-C(28)-C(33) | 117.2(5) |
| C(8)-C(12) | 1.508(10) | C(1)-N(1)-Y | 100.6(3) | C(27)-C(28)-C(33) | 125.9(5) |
| C(9)-C(10) | 1.527(9) | C(15)-N(2)-C(2) | 111.4(4) | C(30)-C(29)-C(28) | 123.9(5) |
| C(9)-C(11) | 1.536(8) | C(15)-N(2)-Y | 137.0(3) | C(29)-C(30)-C(31) | 117.5(5) |
| C(12)-C(14) | 1.531(10) | C(2)-N(2)-Y | 108.3(3) | C(29)-C(30)-C(37) | 122.0(5) |
| C(12)-C(13) | 1.537(11) | N(1)-C(1)-C(2) | 112.9(5) | C(31)-C(30)-C(37) | 120.5(6) |
| C(15)-C(20) | 1.411(8) | N(2)-C(2)-C(1) | 112.1(4) | C(30)-C(31)-C(32) | 122.1(5) |
| C(15)-C(16) | 1.425(7) | C(8)-C(3)-C(4) | 120.3(5) | C(27)-C(32)-C(31) | 117.9(5) |
| C(16)-C(17) | 1.390(7) | C(8)-C(3)-N(1) | 120.2(6) | C(27)-C(32)-C(38) | 122.4(5) |
| C(16)-C(21) | 1.506(8) | C(4)-C(3)-N(1) | 119.5(5) | C(31)-C(32)-C(38) | 119.7(5) |
| C(17)-C(18) | 1.378(8) | C(5)-C(4)-C(3) | 118.0(6) | C(36)-C(33)-C(34) | 106.6(6) |
| C(18)-C(19) | 1.366(8) | C(5)-C(4)-C(9) | 120.0(6) | C(36)-C(33)-C(28) | 111.2(5) |
| C(19)-C(20) | 1.387(7) | C(3)-C(4)-C(9) | 121.8(5) | C(34)-C(33)-C(28) | 118.1(5) |
| C(20)-C(24) | 1.516(8) | C(6)-C(5)-C(4) | 121.7(7) | C(36)-C(33)-C(35) | 108.1(6) |
| C(21)-C(23) | 1.522(8) | C(7)-C(6)-C(5) | 119.3(6) | C(34)-C(33)-C(35) | 104.3(5) |
| C(21)-C(22) | 1.536(8) | C(6)-C(7)-C(8) | 122.5(7) | C(28)-C(33)-C(35) | 108.0(5) |
| C(24)-C(26) | 1.533(9) | C(7)-C(8)-C(3) | 118.1(7) | C(40)-C(38)-C(39) | 110.2(5) |
| C(24)-C(25) | 1.537(9) | C(7)-C(8)-C(12) | 119.8(6) | C(40)-C(38)-C(41) | 106.3(5) |
| C(27)-C(32) | 1.399(7) | C(3)-C(8)-C(12) | 122.1(6) | C(39)-C(38)-C(41) | 106.9(6) |
| C(27)-C(28) | 1.414(7) | C(4)-C(9)-C(10) | 114.4(5) | C(40)-C(38)-C(32) | 111.2(5) |
| C(28)-C(29) | 1.395(7) | C(4)-C(9)-C(11) | 110.7(5) | C(39)-C(38)-C(32) | 109.8(4) |
| C(28)-C(33) | 1.545(8) | C(10)-C(9)-C(11) | 109.7(6) | C(41)-C(38)-C(32) | 112.3(5) |
| C(29)-C(30) | 1.375(8) | C(8)-C(12)-C(14) | 112.9(7) | O(2)-C(42)-C(43) | 106.0(7) |
| C(30)-C(31) | 1.399(8) | C(8)-C(12)-C(13) | 111.1(6) | C(44)-C(43)-C(42) | 105.4(8) |
| C(30)-C(37) | 1.510(7) | C(14)-C(12)-C(13) | 111.1(7) | C(43)-C(44)-C(45) | 105.5(6) |
| C(31)-C(32) | 1.404(8) | C(20)-C(15)-N(2) | 120.5(5) | O(2)-C(45)-C(44) | 104.5(6) |
| C(32)-C(38) | 1.542(7) | C(20)-C(15)-C(16) | 119.4(5) |  |  |
| C(33)-C(36) | 1.493(9) | N(2)-C(15)-C(16) | 120.0(5) |  |  |
| C(33)-C(34) | 1.531(8) | C(17)-C(16)-C(15) | 118.9(5) |  |  |

## [Si{ArN(CH2)2NAr}HPh] 16

Identification code jun1203

Empirical formula C32 H44 N2 Si

Formula weight 484.78

Temperature 173(2) K

Wavelength 0.71073 Å

Crystal system Monoclinic

Space group P21/n (No.14)

Unit cell dimensions a = 16.7778(3) Å α = 90°.

b = 9.6378(1) Å β = 109.171(1)°.

c = 19.7477(3) Å γ = 90°.

Volume 3016.14(8) Å3

Z 4

Density (calculated) 1.07 Mg/m3

Absorption coefficient 0.10 mm-1

F(000) 1056

Crystal size 0.35 x 0.35 x 0.30 mm3

Theta range for data collection 3.75 to 25.02°.

Index ranges -19<=h<=19, -11<=k<=11, -23<=l<=20

Reflections collected 27657

Independent reflections 5266 [R(int) = 0.061]

Reflections with I>2sigma(I) 4375

Completeness to theta = 25.02° 99.1 %

Refinement method Full-matrix least-squares on F2

Data / restraints / parameters 5266 / 0 / 320

Goodness-of-fit on F2 1.037

Final R indices [I>2sigma(I)] R1 = 0.041, wR2 = 0.098

R indices (all data) R1 = 0.054, wR2 = 0.106

Largest diff. peak and hole 0.20 and -0.26 e.Å-3

Data collection KappaCCD , Program package WinGX , Abs correction not applied ,

Refinement using SHELXL-97 , Drawing using ORTEP-3 for Windows

Table 2. Atomic coordinates ( x 104) and equivalent isotropic displacement parameters (Å2x 103)

for jun1203. U(eq) is defined as one third of the trace of the orthogonalized Uij tensor.

________________________________________________________________________________

x y z U(eq)

________________________________________________________________________________

Si 2888(1) 4835(1) 239(1) 27(1)

N(1) 2579(1) 6534(1) 128(1) 30(1)

N(2) 2076(1) 4353(1) 540(1) 29(1)

C(1) 1901(1) 6843(2) 424(1) 37(1)

C(2) 1456(1) 5475(2) 456(1) 36(1)

C(3) 2812(1) 7558(2) -301(1) 32(1)

C(4) 2406(1) 7564(2) -1048(1) 37(1)

C(5) 2670(1) 8523(2) -1460(1) 47(1)

C(6) 3305(1) 9453(2) -1146(1) 49(1)

C(7) 3683(1) 9465(2) -413(1) 45(1)

C(8) 3446(1) 8531(2) 24(1) 36(1)

C(9) 1687(1) 6580(2) -1412(1) 48(1)

C(10) 1861(2) 5709(3) -1991(1) 75(1)

C(11) 855(1) 7380(3) -1717(1) 82(1)

C(12) 3888(1) 8577(2) 826(1) 43(1)

C(13) 3872(2) 10042(2) 1125(1) 70(1)

C(14) 4791(1) 8028(2) 1019(1) 59(1)

C(15) 1775(1) 2978(2) 613(1) 30(1)

C(16) 1368(1) 2182(2) -3(1) 36(1)

C(17) 1083(1) 857(2) 93(1) 45(1)

C(18) 1172(1) 347(2) 763(1) 46(1)

C(19) 1553(1) 1144(2) 1361(1) 40(1)

C(20) 1862(1) 2468(2) 1299(1) 32(1)

C(21) 1230(1) 2704(2) -756(1) 40(1)

C(22) 1724(1) 1846(2) -1133(1) 56(1)

C(23) 293(1) 2745(2) -1207(1) 60(1)

C(24) 2279(1) 3299(2) 1978(1) 33(1)

C(25) 1665(1) 3594(2) 2386(1) 50(1)

C(26) 3068(1) 2570(2) 2465(1) 47(1)

C(27) 3954(1) 4445(2) 876(1) 32(1)

C(28) 4195(1) 4738(2) 1606(1) 42(1)

C(29) 5011(1) 4477(2) 2056(1) 58(1)

C(30) 5597(1) 3935(3) 1779(1) 67(1)

C(31) 5380(1) 3647(2) 1063(1) 62(1)

C(32) 4564(1) 3892(2) 613(1) 43(1)

________________________________________________________________________________

Table 3. Bond lengths [Å] and angles [°] for jun1203.

| Si-N(1) | 1.7098(13) | C(24)-C(25) | 1.529(2) | C(4)-C(9)-C(10) | 112.42(17) |
| --- | --- | --- | --- | --- | --- |
| Si-N(2) | 1.7196(13) | C(27)-C(28) | 1.393(2) | C(4)-C(9)-C(11) | 110.58(17) |
| Si-C(27) | 1.8557(16) | C(27)-C(32) | 1.397(2) | C(10)-C(9)-C(11) | 110.86(18) |
| N(1)-C(3) | 1.435(2) | C(28)-C(29) | 1.388(3) | C(8)-C(12)-C(14) | 110.89(15) |
| N(1)-C(1) | 1.4704(19) | C(29)-C(30) | 1.377(3) | C(8)-C(12)-C(13) | 111.40(16) |
| N(2)-C(15) | 1.4418(19) | C(30)-C(31) | 1.368(3) | C(14)-C(12)-C(13) | 111.34(17) |
| N(2)-C(2) | 1.4725(19) | C(31)-C(32) | 1.385(3) | C(20)-C(15)-C(16) | 120.64(14) |
| C(1)-C(2) | 1.527(2) |  |  | C(20)-C(15)-N(2) | 119.26(13) |
| C(3)-C(8) | 1.405(2) | N(1)-Si-N(2) | 93.59(6) | C(16)-C(15)-N(2) | 120.06(14) |
| C(3)-C(4) | 1.408(2) | N(1)-Si-C(27) | 117.70(7) | C(17)-C(16)-C(15) | 118.05(16) |
| C(4)-C(5) | 1.396(2) | N(2)-Si-C(27) | 114.02(7) | C(17)-C(16)-C(21) | 119.21(15) |
| C(4)-C(9) | 1.517(2) | C(3)-N(1)-C(1) | 119.44(12) | C(15)-C(16)-C(21) | 122.74(15) |
| C(5)-C(6) | 1.374(3) | C(3)-N(1)-Si | 127.22(10) | C(18)-C(17)-C(16) | 121.64(16) |
| C(6)-C(7) | 1.377(3) | C(1)-N(1)-Si | 112.56(10) | C(17)-C(18)-C(19) | 119.92(16) |
| C(7)-C(8) | 1.393(2) | C(15)-N(2)-C(2) | 115.35(12) | C(18)-C(19)-C(20) | 121.07(17) |
| C(8)-C(12) | 1.512(2) | C(15)-N(2)-Si | 128.76(10) | C(19)-C(20)-C(15) | 118.65(15) |
| C(9)-C(10) | 1.523(3) | C(2)-N(2)-Si | 111.92(10) | C(19)-C(20)-C(24) | 118.78(15) |
| C(9)-C(11) | 1.534(3) | N(1)-C(1)-C(2) | 107.17(12) | C(15)-C(20)-C(24) | 122.57(14) |
| C(12)-C(14) | 1.528(3) | N(2)-C(2)-C(1) | 107.51(12) | C(16)-C(21)-C(22) | 111.49(15) |
| C(12)-C(13) | 1.534(3) | C(8)-C(3)-C(4) | 120.60(15) | C(16)-C(21)-C(23) | 112.12(15) |
| C(15)-C(20) | 1.404(2) | C(8)-C(3)-N(1) | 120.10(14) | C(22)-C(21)-C(23) | 110.41(15) |
| C(15)-C(16) | 1.410(2) | C(4)-C(3)-N(1) | 119.29(14) | C(20)-C(24)-C(26) | 111.41(13) |
| C(16)-C(17) | 1.398(2) | C(5)-C(4)-C(3) | 118.45(16) | C(20)-C(24)-C(25) | 111.57(14) |
| C(16)-C(21) | 1.515(2) | C(5)-C(4)-C(9) | 119.56(15) | C(26)-C(24)-C(25) | 110.39(15) |
| C(17)-C(18) | 1.372(3) | C(3)-C(4)-C(9) | 121.98(15) | C(28)-C(27)-C(32) | 117.54(15) |
| C(18)-C(19) | 1.377(3) | C(6)-C(5)-C(4) | 121.15(17) | C(28)-C(27)-Si | 123.27(13) |
| C(19)-C(20) | 1.398(2) | C(5)-C(6)-C(7) | 120.01(17) | C(32)-C(27)-Si | 119.12(13) |
| C(20)-C(24) | 1.520(2) | C(6)-C(7)-C(8) | 121.33(17) | C(29)-C(28)-C(27) | 121.08(18) |
| C(21)-C(22) | 1.527(3) | C(7)-C(8)-C(3) | 118.40(15) | C(30)-C(29)-C(28) | 119.83(19) |
| C(21)-C(23) | 1.532(2) | C(7)-C(8)-C(12) | 119.23(15) | C(31)-C(30)-C(29) | 120.39(18) |
| C(24)-C(26) | 1.529(2) | C(3)-C(8)-C(12) | 122.36(14) | C(30)-C(31)-C(32) | 119.93(19) |
|  |  |  |  | C(31)-C(32)-C(27) | 121.22(18) |

Distance X..Y

1.382 (0.015) Si - H1

Angle XYZ

110.7 ( 0.6) N1 - Si - H1

117.7 ( 0.6) N2 - Si - H1

103.7 ( 0.6) C27 - Si - H1
